# Supplementary material for: A Complete Set of Nascent Transcription Rates for Yeast Genes
Source: PLOS journal article supplement (doi:10.1371/journal.pone.0015442), 2010-11-16

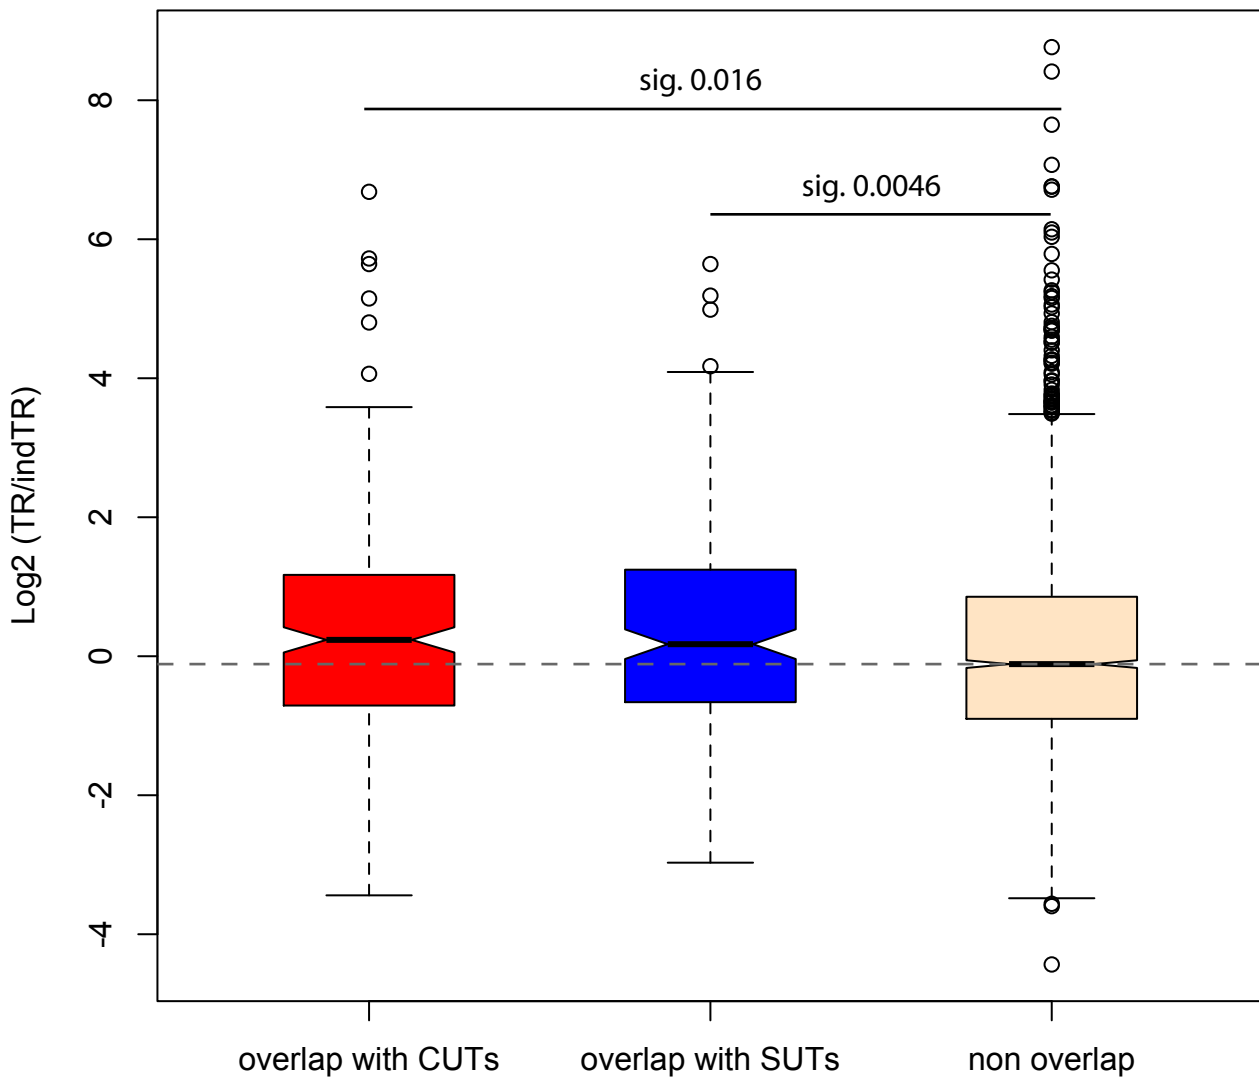

Supplement: S8 (10.1371/journal.pone.0015442.s008) [file journal.pone.0015442.s008]
