# Supplementary material for: A Complete Set of Nascent Transcription Rates for Yeast Genes
Source: PLOS journal article supplement (doi:10.1371/journal.pone.0015442), 2010-11-16
Supplement: S10 (10.1371/journal.pone.0015442.s010) [file journal.pone.0015442.s010]

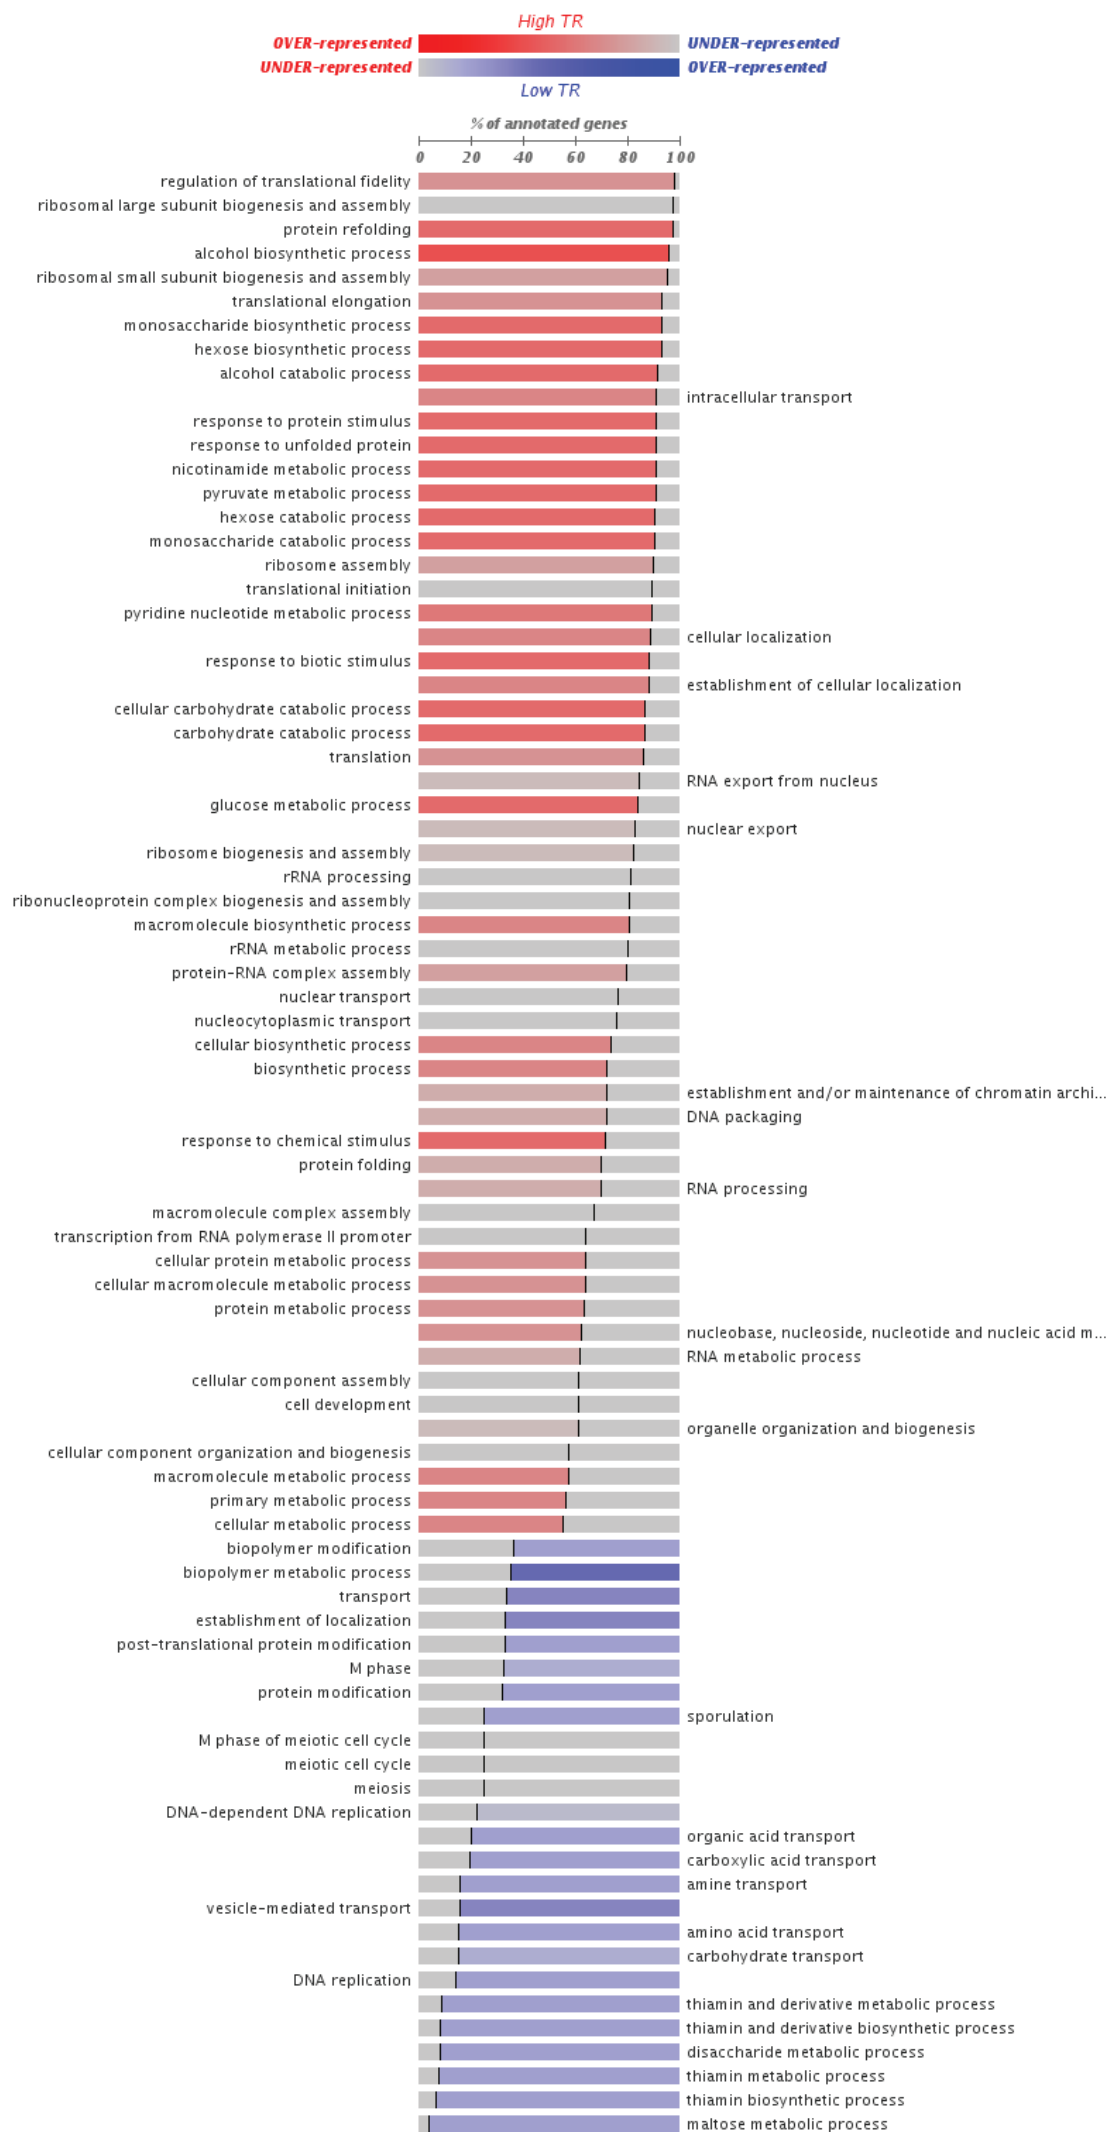

Over/Under term representation in GO biological process between levels 3 to 9

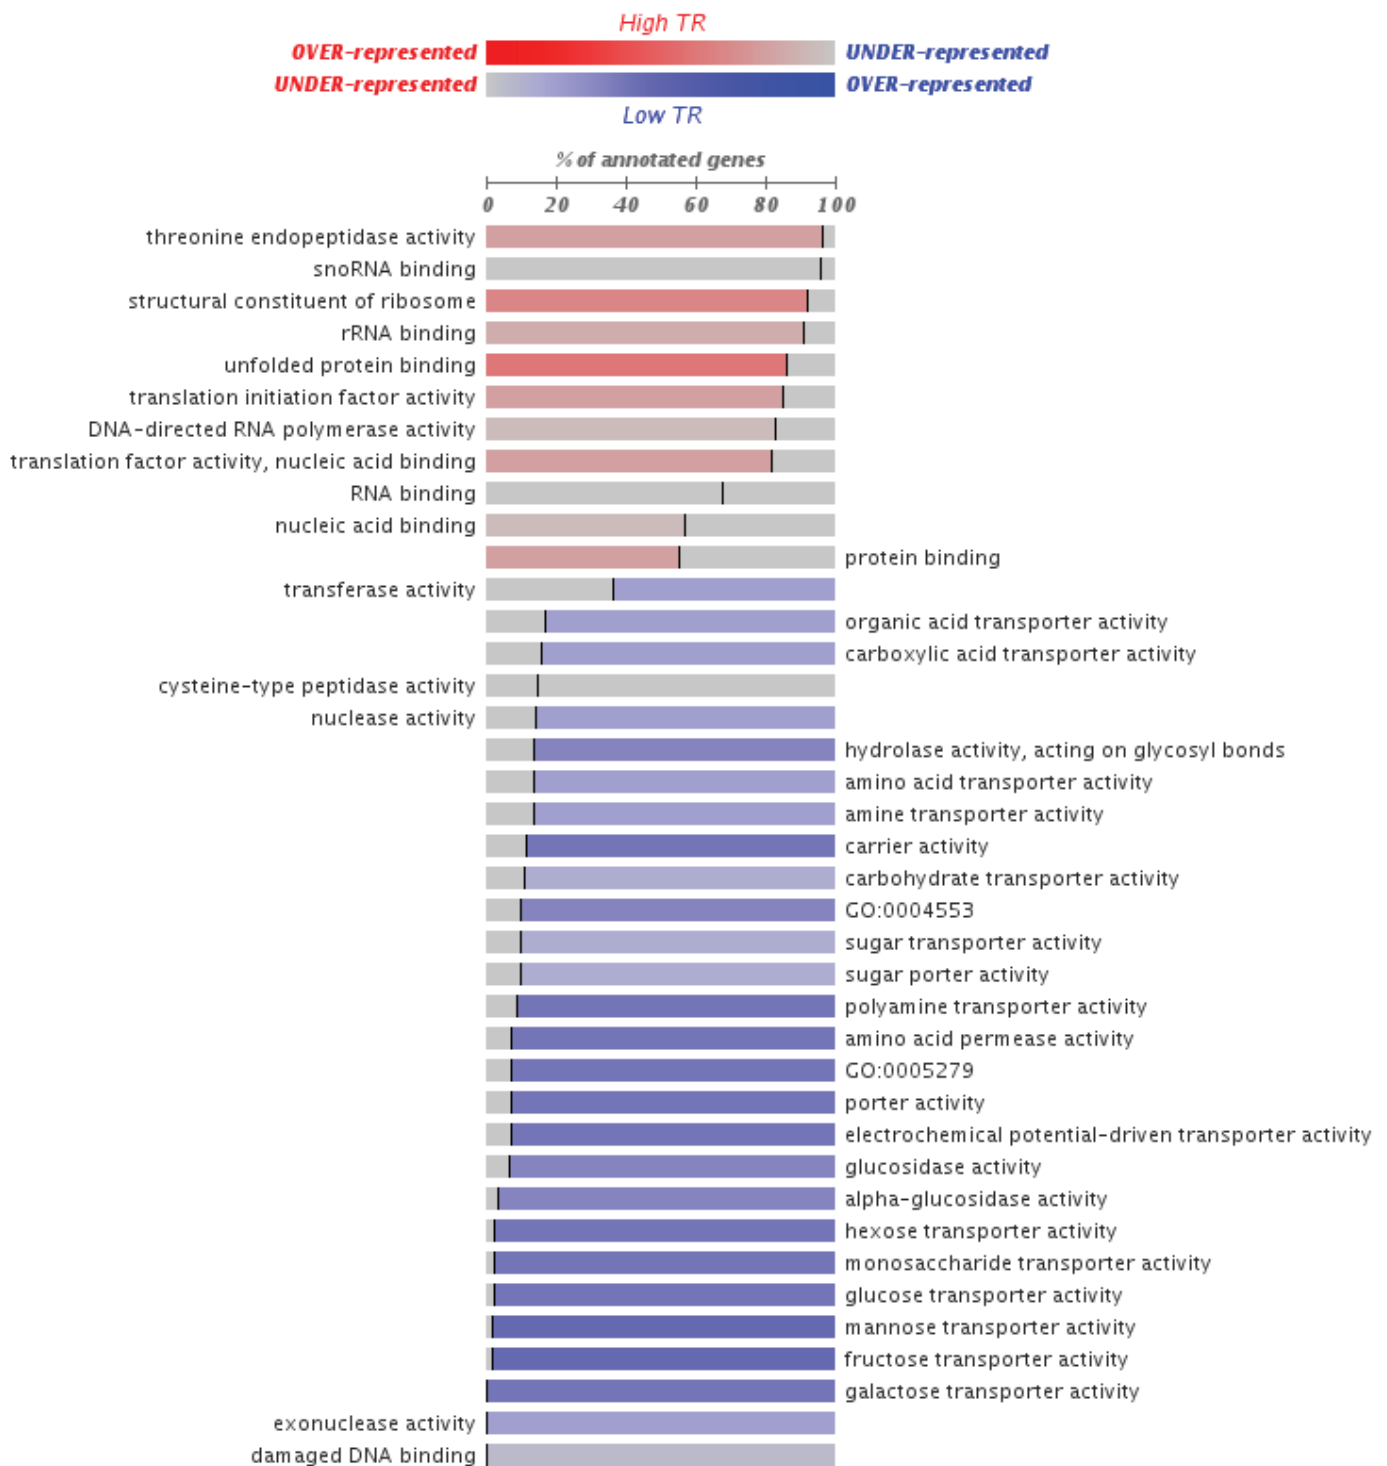

**Over/Under term representation in GO molecular function between levels 3 to 9**

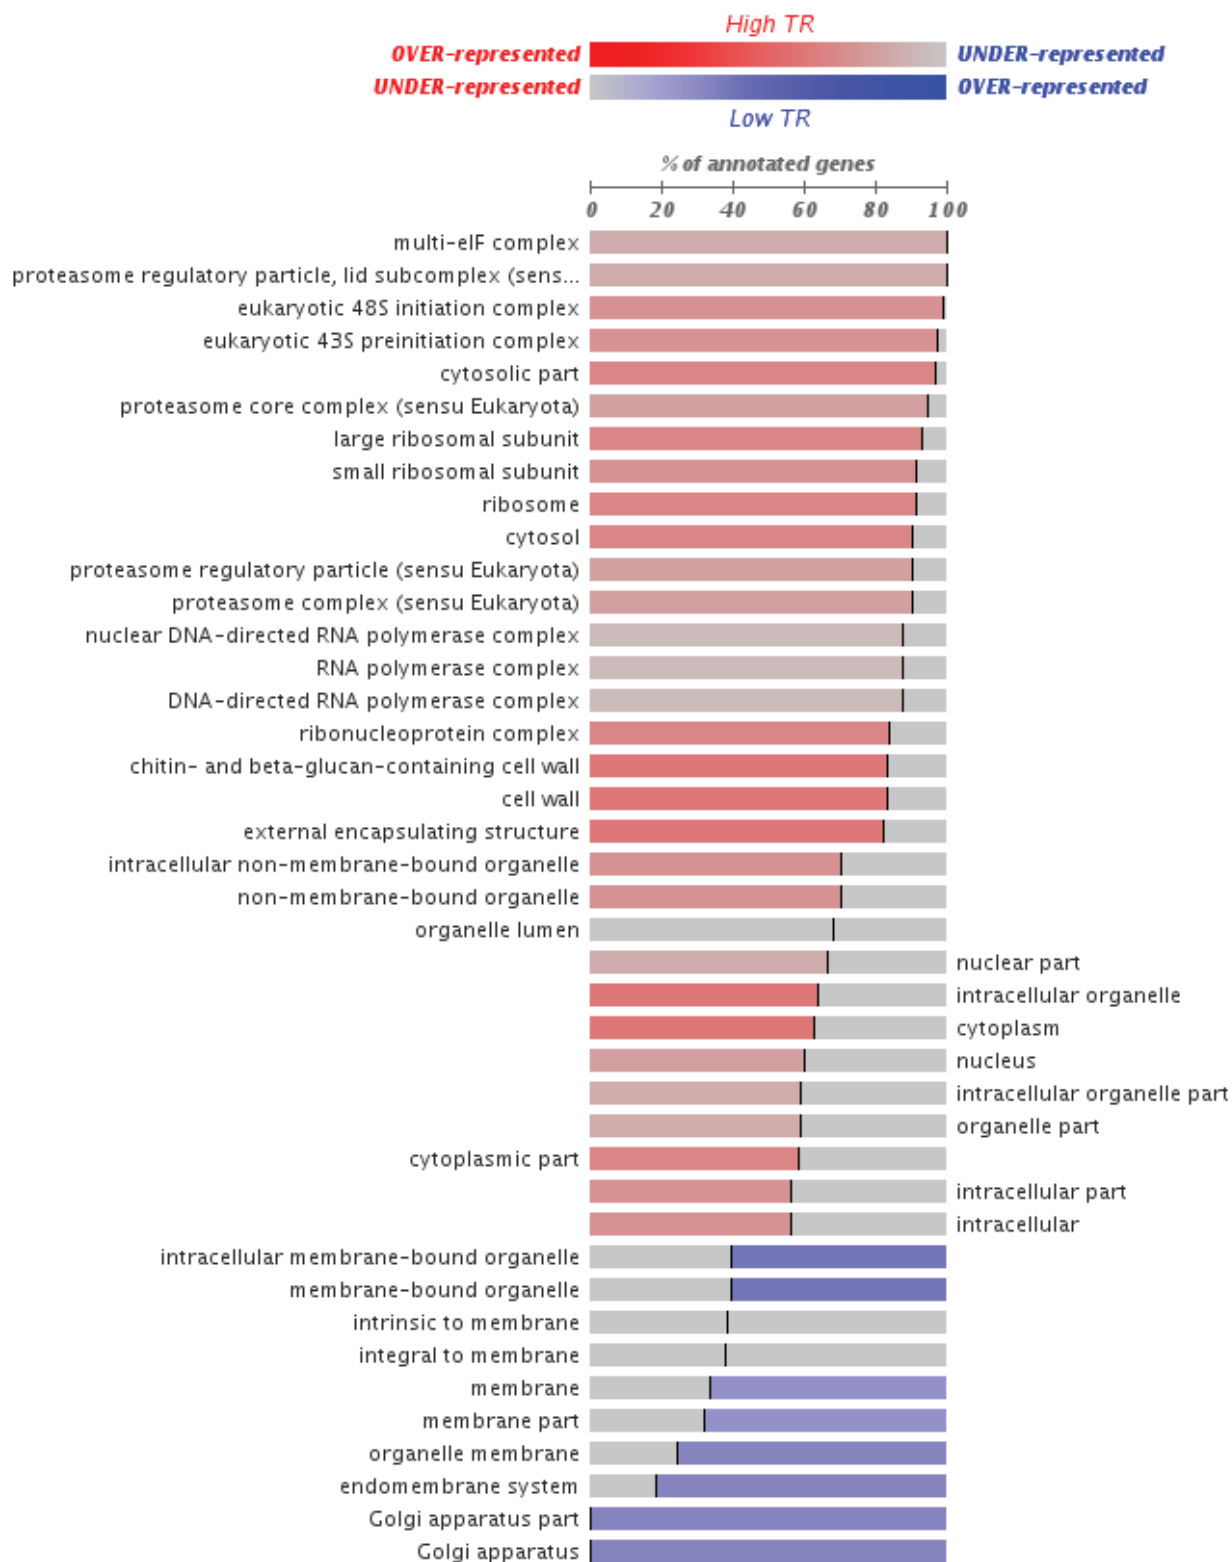

*Over/Under term representation in GO cellular component between levels 3 to 9*
