# Supplementary material for: A Complete Set of Nascent Transcription Rates for Yeast Genes
Source: PLOS journal article supplement (doi:10.1371/journal.pone.0015442), 2010-11-16
Supplement: S11 (10.1371/journal.pone.0015442.s011) [file journal.pone.0015442.s011]

High % of TR to compensate dilution  
**OVER-represented** **UNDER-represented**  
**UNDER-represented** **OVER-represented**  
 Low % of TR to compensate dilution

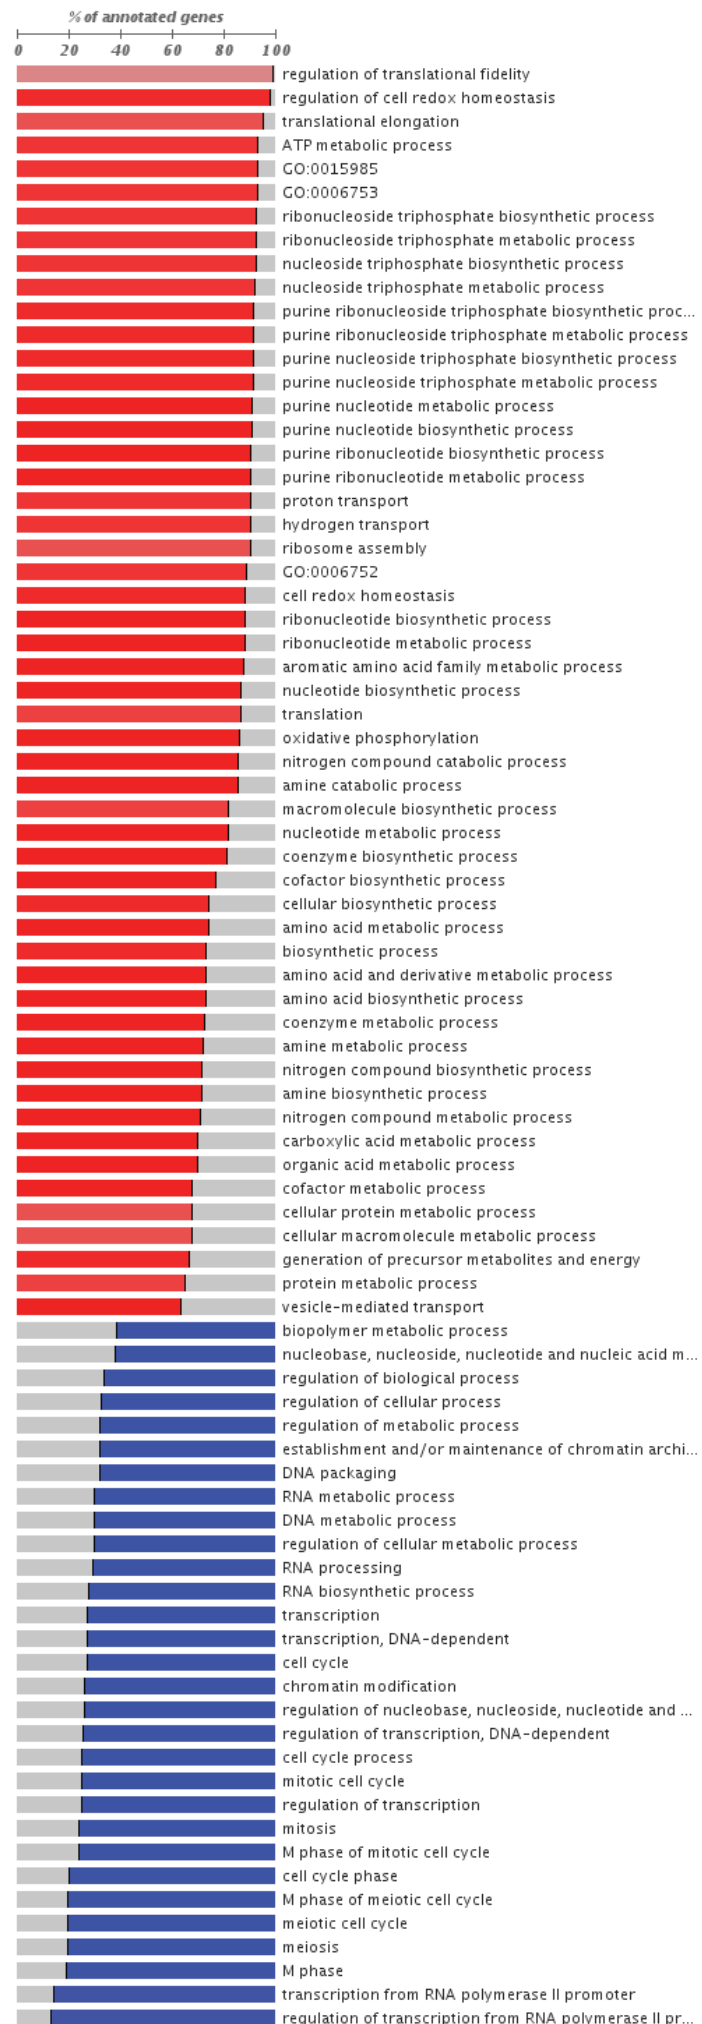

Over/Under term representation in GO biological process between levels 3 to 9

High % of TR to compensate dilution  
**OVER-represented**  **UNDER-represented**  
**UNDER-represented**  **OVER-represented**  
 Low % of TR to compensate dilution

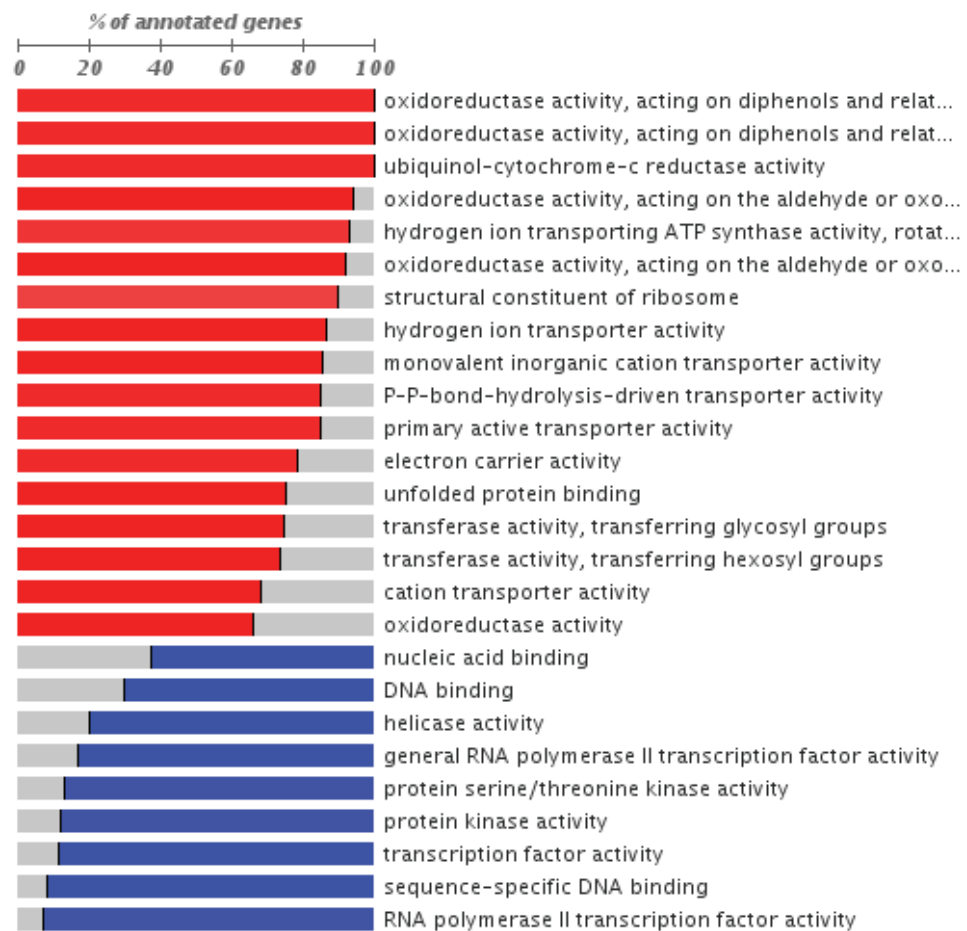

Over/Under term representation in GO molecular function between levels 3 to 9

High % of TR to compensate dilution  
**OVER-represented**  **UNDER-represented**  
**UNDER-represented**  **OVER-represented**  
 Low % of TR to compensate dilution

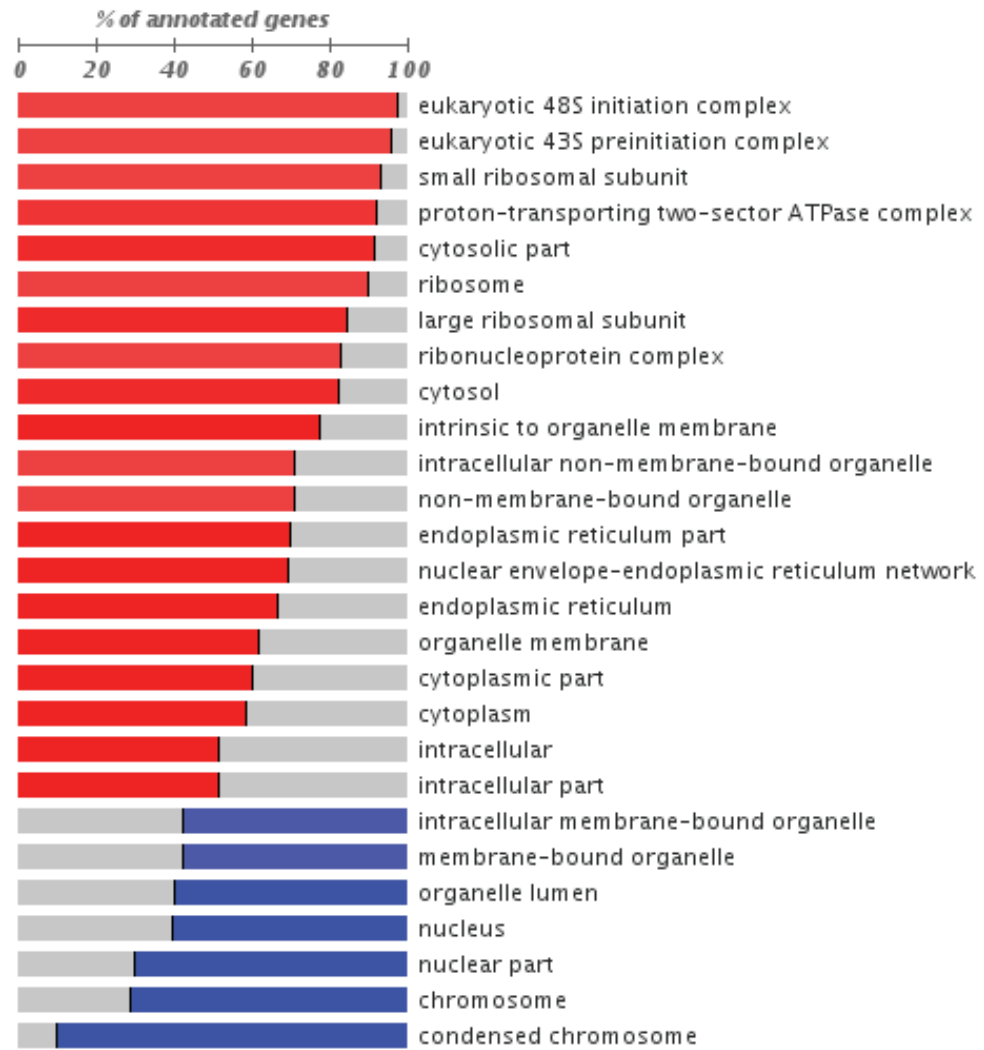

*Over/Under term representation in GO cellular component between levels 3 to 9*
