# Supplementary material for: A Complete Set of Nascent Transcription Rates for Yeast Genes
Source: PLoS One. 2010 Nov 16;5(11):e15442. doi: 10.1371/journal.pone.0015442 (PMC2982843; doi:10.1371/journal.pone.0015442)
Supplement: Table S1 — Whole dataset of the nascent TR obtained in this work and other transcription parameters. It is presented the nascent (TR) and the indirect transcription rates (TR indirect) computed from [17]. Both data are shown before and after the correction used to compensate the dilution effect. (XLS) [file pone.0015442.s002.xls]

## Sheet: Sup.table1
Sistematic name	Gene name	RA (mol/cell) [Nagalakshmi et al. 2008; Miura et al. 2008]	RS (min) [Wang et al. 2002]	TR indirect (mol/min) w/o dilution correction	TR (mol/min) w/o dilution correction	TR indirect (mol/min) dilution corrected	TR (mol/min) dilution corrected	RNA pol II density (per kb)	RNA pol II presence (per gene)
YAL001C	TFC3		27		0.0801957		0.0940812	0.0627208	0.224039
YAL002W	VPS8		54		0.0519231		0.0609133	0.0406089	0.155288
YAL003W	EFB1	45.9196			1.51842		1.78133	1.18755	1.17093
YAL004W			88		0.451752		0.52997	0.353314	0.228594
YAL005C	SSA1	74.2912			1.02581		1.20342	0.802281	1.5468
YAL007C	ERP2	4.29095	22	0.135194	0.0517079	0.161515	0.0606609	0.0404406	0.0261651
YAL008W	FUN14	2.04941	42	0.0338225	0.0323468	0.0463936	0.0379475	0.0252983	0.0150778
YAL009W	SPO7	1.24886
YAL010C	MDM10	0.576397	16	0.0249705		0.0285061
YAL011W	SWC3	0.800551			0.0942403		0.110558	0.073705	0.138344
YAL012W	CYS3	15.1785	47	0.223849		0.316954
YAL013W	DEP1	2.65783	14	0.131591	0.215993	0.147894	0.253392	0.168928	0.213187
YAL014C	SYN8	5.53981	19	0.2021	0.150615	0.236082	0.176694	0.117796	0.0903493
YAL015C	NTG1	1.53706	126	0.00845562		0.017884
YAL016C-A		0.0640441
YAL016C-B
YAL016W	TPD3	3.17018	39	0.0563437	0.161061	0.0757897	0.188948	0.125965	0.240215
YAL017W	PSK1		71		0.0586662		0.068824	0.0458827	0.186743
YAL018C		0.0640441	48	0.000924833		0.00131768
YAL019W	FUN30	1.40897	15	0.0651082	0.121601	0.0737509	0.142656	0.0951039	0.322878
YAL019W-A
YAL020C	ATS1	0.512353	40	0.0088784	0.0867196	0.0120212	0.101735	0.0678232	0.067891
YAL021C	CCR4	0.832573	22	0.0262316	0.189988	0.0313387	0.222883	0.148589	0.373403
YAL022C	FUN26	2.88198	15	0.133176		0.150854
YAL023C	PMT2	7.8454	20	0.271901	0.260401	0.320025	0.305488	0.203658	0.464138
YAL024C	LTE1	0.288198	25	0.00799056	0.0728458	0.00975838	0.0854588	0.0569725	0.245381
YAL025C	MAK16	2.40165
YAL026C	DRS2		40
YAL026C-A
YAL027W			33		0.0627897		0.0736615	0.0491076	0.0385495
YAL028W	FRT2	1.08875	43	0.0175503		0.0242288
YAL029C	MYO4	2.40165	28	0.0594536	0.0679712	0.0741854	0.0797402	0.0531601	0.234702
YAL030W	SNC1	5.41173	41	0.0914908	0.0828901	0.124687	0.0972422	0.0648281	0.0302099
YAL031C	GIP4		18		0.0802245		0.094115	0.0627433	0.14318
YAL031W-A
YAL032C	PRP45	0.32022	31	0.00716		0.00912424
YAL033W	POP5	1.24886	9	0.0961826	0.0860049	0.103843	0.100896	0.0672642	0.0350446
YAL034C	FUN19	0.672463	45	0.0103581	0.103205	0.014483	0.121074	0.080716	0.100169
YAL034C-B
YAL034W-A	MTW1	0.832573			0.218326		0.256128	0.170752	0.148383
YAL035W	FUN12		27		0.221529		0.259886	0.173257	0.521157
YAL036C	RBG1	3.61849	17	0.147538	0.0919147	0.169734	0.107829	0.0718862	0.0797218
YAL037C-A		173.015
YAL037C-B
YAL037W		0.128088	88	0.00100891	0.0233529	0.00179461	0.0273964	0.0182643	0.0146662
YAL038W	CDC19		72
YAL039C	CYC3	2.62581
YAL040C	CLN3	1.50504	18	0.0579562	0.138837	0.0671882	0.162876	0.108584	0.189153
YAL041W	CDC24	2.08143	7	0.206106	0.11599	0.218873	0.136073	0.0907152	0.232594
YAL042C-A
YAL042W	ERV46	7.10889	17	0.289854	0.208151	0.33346	0.244191	0.162794	0.203004
YAL043C	PTA1	0.576397	14	0.0285377		0.0320733
YAL044C	GCV3		40		0.110493		0.129625	0.0864165	0.0442453
YAL044W-A
YAL045C			24		0.120842		0.141765	0.0945101	0.0291091
YAL046C		2.78592	30	0.0643684	0.164656	0.0814573	0.193165	0.128777	0.0458445
YAL047C	SPC72		15		0.0420732		0.0493579	0.0329053	0.0614671
YAL047W-A
YAL048C	GEM1	0.704485	52	0.00939061	0.0612059	0.013712	0.0718035	0.047869	0.0951635
YAL049C		3.61849	35	0.0716613	0.095933	0.0938573	0.112543	0.0750289	0.0555214
YAL051W	OAF1	0.192132			0.0348692		0.0409066	0.0272711	0.085713
YAL053W	FLC2	2.62581	23	0.0791335	0.085218	0.0952404	0.0999731	0.0666487	0.156691
YAL054C	ACS1	1.28088	73	0.0121622	0.0498338	0.0200192	0.0584623	0.0389748	0.0834452
YAL055W	PEX22	1.08875	23	0.0328115	0.0781681	0.0394899	0.0917025	0.061135	0.0331352
YAL056C-A
YAL056W	GPB2	1.15279
YAL058W	CNE1		16
YAL059C-A
YAL059W	ECM1	1.56908	15	0.0725069	0.142801	0.0821317	0.167526	0.111684	0.0712545
YAL060W	BDH1	5.18757	70	0.0513679		0.0831887
YAL061W		3.7786			0.0504434		0.0591775	0.0394516	0.0494329
YAL062W	GDH3	0.640441	51	0.00870431	0.0598663	0.0126328	0.0702318	0.0468212	0.0642855
YAL063C	FLO9		58
YAL063C-A		0.0640441
YAL064C-A			29
YAL064W
YAL064W-B			30		0.0571423		0.0670362	0.0446908	0.0169825
YAL065C		0.0640441	34	0.00130565	0.0940091	0.0016985	0.110286	0.0735243	0.0283804
YAL066W		0.0640441
YAL067C	SEO1	0.192132
YAL067W-A
YAL068C
YAL068W-A
YAL069W			32
YAR002C-A	ERP1	2.08143	20	0.072137	0.077264	0.0849046	0.0906419	0.060428	0.039822
YAR002W	NUP60	1.37695	14	0.0681734	0.150684	0.0766197	0.176774	0.11785	0.190798
YAR003W	SWD1	0.800551			0.0807703		0.0947554	0.0631702	0.0808579
YAR007C	RFA1	6.56452	13	0.350014	0.0797005	0.390281	0.0935003	0.0623335	0.116252
YAR008W	SEN34	0.256176	13	0.0136591	0.0239897	0.0152305	0.0281434	0.0187623	0.0155164
YAR014C	BUD14	2.91401	22	0.0918107		0.109685
YAR015W	ADE1	8.87011	19	0.323594	0.135541	0.378004	0.159009	0.106006	0.0975258
YAR018C	KIN3	3.42636	7	0.339282	0.0628423	0.360299	0.0737232	0.0491488	0.0642374
YAR019C	CDC15	0.992683	24	0.0286698	0.0347407	0.034759	0.0407559	0.0271706	0.0794469
YAR019W-A		0.0640441
YAR020C	PAU7		49
YAR023C		0.384265
YAR027W	UIP3	1.82526	35	0.0361478		0.047344
YAR028W		1.28088	24	0.0369933	0.172229	0.0448503	0.202049	0.1347	0.0948285
YAR029W			37		0.20574		0.241363	0.160909	0.0360435
YAR030C
YAR031W	PRM9		23		0.0555435		0.0651606	0.0434404	0.0389226
YAR033W	MST28				0.043906		0.0515081	0.0343387	0.0241745
YAR035C-A
YAR035W	YAT1		36
YAR042W	SWH1	0.800551	29	0.0191345	0.160655	0.0240451	0.188472	0.125648	0.448061
YAR047C		0.256176	31	0.005728		0.0072994
YAR050W	FLO1		36		0.0831622		0.0975614	0.0650409	0.300034
YAR053W			45
YAR060C			32		0.0398761		0.0467804	0.031187	0.0104476
YAR064W					0.0561458		0.0658672	0.0439115	0.0131295
YAR066W			41
YAR068W			18		0.245985		0.288577	0.192384	0.0933065
YAR069C
YAR070C
YAR071W	PHO11		14
YAR073W	IMD1		25		0.0501478		0.0588307	0.0392204	0.0474959
YAR075W		0.0640441	26	0.00170738		0.00210023
YBL001C	ECM15	7.23698	33	0.152009		0.196401
YBL002W	HTB2	18.6048	10	1.28959	0.525704	1.40371	0.616727	0.411152	0.162405
YBL003C	HTA2	34.808	7	3.44672	0.587676	3.66023	0.689429	0.459619	0.182929
YBL004W	UTP20	1.44099			0.142912		0.167657	0.111771	0.836162
YBL005W	PDR3	2.4657	43	0.0397463	0.112897	0.054871	0.132444	0.0882962	0.258708
YBL006C	LDB7	5.50779	13	0.29367	0.240589	0.327455	0.282246	0.188164	0.101985
YBL006W-A
YBL007C	SLA1	4.70724	24	0.13595	0.147693	0.164825	0.173265	0.11551	0.431315
YBL008W	HIR1	0.0640441
YBL008W-A
YBL009W		1.08875	19	0.0397191	0.0498136	0.0463976	0.0584386	0.0389591	0.0790869
YBL010C		1.12077	11	0.0706236	0.0453462	0.0774985	0.0531977	0.0354651	0.0298616
YBL011W	SCT1	1.85728	14	0.0919548	0.10268	0.103347	0.120458	0.0803055	0.183016
YBL012C		0.192132			0.0956461		0.112207	0.0748045	0.0299966
YBL013W	FMT1	0.0640441
YBL014C	RRN6	0.512353			0.139832		0.164043	0.109362	0.293528
YBL015W	ACH1	0.832573			0.0655613		0.0769129	0.0512753	0.0810149
YBL016W	FUS3	1.34493
YBL017C	PEP1	3.07412
YBL018C	POP8		48		0.163941		0.192327	0.128218	0.0610316
YBL019W	APN2				0.0467498		0.0548443	0.0365629	0.0571112
YBL020W	RFT1	0.768529	11	0.0484276	0.0627406	0.0531418	0.0736039	0.0490693	0.0845954
YBL021C	HAP3	0.800551			0.229504		0.269242	0.179494	0.0779006
YBL022C	PIM1	2.68985	17	0.109674	0.0448384	0.126174	0.052602	0.035068	0.119266
YBL023C	MCM2	0.512353	12	0.0295947		0.0327375
YBL024W	NCL1	0.416287	8	0.0360685	0.235859	0.038622	0.276697	0.184465	0.37889
YBL025W	RRN10	0.672463			0.114114		0.133873	0.0892485	0.0390016
YBL026W	LSM2	7.07687	29	0.169149	0.104018	0.212559	0.122028	0.0813518	0.033761
YBL027W	RPL19B	36.281	33	0.762062	0.514639	0.984612	0.603747	0.402498	0.38358
YBL028C		6.50048	10	0.450579		0.490453
YBL029C-A		5.34768
YBL029W		0.576397	17	0.0235016		0.0270373
YBL030C	PET9	12.8408	21	0.423838	0.0930868	0.502604	0.109204	0.0728029	0.0695996
YBL031W	SHE1	0.480331	14	0.0237814	0.037224	0.0267278	0.0436692	0.0291128	0.0295786
YBL032W	HEK2	6.34037	8	0.549351	0.168274	0.588243	0.19741	0.131607	0.15069
YBL033C	RIB1	1.40897	30	0.0325541	0.210943	0.0411968	0.247467	0.164978	0.171082
YBL034C	STU1	0.640441	17	0.0261129		0.0300414
YBL035C	POL12	0.864595	7	0.0856131	0.0869339	0.0909166	0.101986	0.0679908	0.143936
YBL036C		1.85728	13	0.0990283	0.130162	0.110421	0.152699	0.1018	0.0786911
YBL037W	APL3	0.640441			0.0403735		0.047364	0.031576	0.0971593
YBL038W	MRPL16	2.20952	13	0.117809		0.131363
YBL039C	URA7	1.79323	9	0.138108		0.149108
YBL039C-A
YBL039W-B		0.896617
YBL040C	ERD2	4.80331	26	0.128054	0.0996689	0.157518	0.116926	0.0779508	0.0589308
YBL041W	PRE7	7.5572	19	0.275698	0.286576	0.322054	0.336195	0.22413	0.162494
YBL042C	FUI1	1.40897	4	0.244156	0.275495	0.252799	0.323195	0.215464	0.413474
YBL043W	ECM13	0.256176	33	0.00538085		0.00695224
YBL044W		0.224154	15	0.0103581		0.0117331
YBL045C	COR1	4.45106	31	0.099524	0.045654	0.126827	0.0535588	0.0357059	0.0490242
YBL046W	PSY4	1.28088	12	0.0739866	0.0961762	0.0818436	0.112829	0.0752192	0.0996654
YBL047C	EDE1	4.29095	37	0.0803855	0.207379	0.106706	0.243286	0.162191	0.67228
YBL048W		0.192132	32	0.00416175		0.0053403
YBL049W	MOH1				0.0761656		0.0893533	0.0595689	0.0247807
YBL050W	SEC17	4.80331	22	0.151336		0.1808
YBL051C	PIN4	3.4904	21	0.115208	0.120401	0.136618	0.141248	0.0941652	0.188895
YBL052C	SAS3		11		0.0898953		0.10546	0.0703069	0.175416
YBL053W					0.136634		0.160291	0.106861	0.039966
YBL054W		0.480331	16	0.0208087		0.0237551
YBL055C		2.52974	34	0.051573	0.157631	0.0670906	0.184924	0.123283	0.154843
YBL056W	PTC3	7.65327	15	0.353656	0.18463	0.400602	0.216598	0.144399	0.203025
YBL057C	PTH2		24		0.155093		0.181947	0.121298	0.0781157
YBL058W	SHP1		15		0.331003		0.388315	0.258877	0.329032
YBL059C-A		2.52974
YBL059W		1.72919	23	0.0521123	0.0981357	0.0627193	0.115128	0.0767517	0.0498886
YBL060W		1.82526	28	0.0451847	0.0706489	0.0563809	0.0828815	0.0552543	0.11399
YBL061C	SKT5		29		0.0778812		0.091366	0.0609107	0.127303
YBL062W			32		0.106314		0.124721	0.0831476	0.0315961
YBL063W	KIP1				0.0571108		0.0669992	0.0446662	0.148962
YBL064C	PRX1				0.0303415		0.035595	0.02373	0.0186281
YBL065W
YBL066C	SEF1	0.0640441			0.0483791		0.0567557	0.0378371	0.130387
YBL067C	UBP13	1.05673	10	0.0732468	0.090036	0.0797288	0.105625	0.0704169	0.157945
YBL068W	PRS4	2.24154			0.0480552		0.0563758	0.0375838	0.0369449
YBL068W-A
YBL069W	AST1		11		0.149639		0.175548	0.117032	0.150854
YBL070C			79
YBL071C			29
YBL071C-B
YBL071W-A	KTI11				0.101012		0.118502	0.0790015	0.0195924
YBL072C	RPS8A		22		0.385279		0.451989	0.301326	0.181398
YBL073W		0.0640441			0.0632061		0.0741499	0.0494333	0.0153737
YBL074C	AAR2	0.0640441	20	0.0022196	0.0656309	0.00261245	0.0769946	0.0513297	0.0547688
YBL075C	SSA3	0.704485			0.0855492		0.100362	0.0669078	0.130403
YBL076C	ILS1		33		0.0656752		0.0770466	0.0513644	0.165291
YBL077W			65		0.224769		0.263687	0.175791	0.075766
YBL078C	ATG8	2.1775	104	0.0145128	0.0875146	0.0278696	0.102667	0.0684449	0.0241611
YBL079W	NUP170	0.416287	27	0.010687	0.0958189	0.0132405	0.112409	0.0749397	0.337828
YBL080C	PET112				0.0499052		0.058546	0.0390307	0.0634249
YBL081W			6
YBL082C	ALG3		16		0.0531293		0.0623284	0.0415522	0.0571759
YBL083C			19		0.0349789		0.0410354	0.0273569	0.0116267
YBL084C	CDC27	0.672463	27	0.0172635		0.0213885
YBL085W	BOI1	1.24886
YBL086C		1.3129	15	0.060669	0.0686314	0.0687225	0.0805146	0.0536764	0.075147
YBL087C	RPL23A	35.8327	27	0.919901	0.530885	1.1397	0.622805	0.415203	0.380742
YBL088C	TEL1		40		0.0517435		0.0607026	0.0404684	0.338437
YBL089W	AVT5		26
YBL090W	MRP21	2.04941	24	0.0591893	0.129666	0.0717605	0.152117	0.101411	0.0540521
YBL091C	MAP2	12.6807	26	0.338062	0.057023	0.415846	0.0668963	0.0445975	0.0564159
YBL091C-A	SCS22	2.68985			0.508284		0.596291	0.397527	0.244479
YBL092W	RPL32	68.0789			0.425398		0.499054	0.332703	0.13042
YBL093C	ROX3	3.29827	12	0.190516	0.251532	0.210747	0.295083	0.196722	0.13023
YBL094C			27
YBL095W			26		0.142586		0.167274	0.111516	0.090551
YBL096C					0.238461		0.279749	0.1865	0.0574419
YBL097W	BRN1		24
YBL098W	BNA4	0.512353
YBL099W	ATP1	20.4621	34	0.417154	0.183068	0.542669	0.214765	0.143177	0.23438
YBL100C			31		0.121194		0.142178	0.0947852	0.0297625
YBL100W-C		0.128088
YBL101C	ECM21	1.3129	21	0.043335	0.0708101	0.0513884	0.0830705	0.0553804	0.18569
YBL102W	SFT2	3.17018	13	0.169031	0.0569284	0.188477	0.0667853	0.0445235	0.0288067
YBL103C	RTG3	1.08875	12	0.0628886	0.0795592	0.0695671	0.0933345	0.062223	0.0908456
YBL104C		0.576397			0.036754		0.0431177	0.0287452	0.0895699
YBL105C	PKC1	1.12077	14	0.05549	0.0919799	0.0623648	0.107906	0.0719372	0.248543
YBL106C	SRO77	0.416287	17	0.0169734	0.0343732	0.0195269	0.0403247	0.0268832	0.0815097
YBL107C		3.39434	10	0.235278	0.092897	0.256099	0.108982	0.0726544	0.0428661
YBL107W-A
YBL108C-A
YBL108W		0.0640441
YBL109W
YBL111C
YBL112C			7
YBL113C			5
YBL113W-A
YBR001C	NTH2	0.832573	49	0.0117775	0.0753576	0.0168845	0.0884055	0.058937	0.13803
YBR002C	RER2	1.18482	9	0.0912502	0.165078	0.0985179	0.193661	0.129107	0.111032
YBR003W	COQ1	3.36232	12	0.194215	0.0546514	0.21484	0.0641141	0.0427427	0.0607374
YBR004C	GPI18	1.63312	10	0.1132		0.123217
YBR005W	RCR1	1.53706
YBR006W	UGA2	3.4904	35	0.0691247	0.0618818	0.090535	0.0725964	0.0483976	0.0722576
YBR007C	DSF2	1.28088			0.0824457		0.0967208	0.0644805	0.142502
YBR008C	FLR1	0.640441	17	0.0261129		0.0300414
YBR009C	HHF1		6		1.3835		1.62305	1.08203	0.336512
YBR010W	HHT1	40.4118	6	4.66856	1.58372	4.91644	1.85793	1.23862	0.507836
YBR011C	IPP1	18.893	49	0.267258	0.184456	0.383148	0.216394	0.144263	0.124499
YBR012C		1.6011
YBR013C
YBR014C		4.54713	20	0.157592	0.043649	0.185484	0.0512066	0.0341377	0.0208582
YBR015C	MNN2	3.10614	12	0.179418	0.139487	0.198471	0.163638	0.109092	0.195602
YBR016W		9.4465	18	0.363768	0.265679	0.421713	0.31168	0.207787	0.0802058
YBR017C	KAP104	1.92132	38	0.0350463		0.0468318
YBR018C	GAL7	0.0640441	26	0.00170738		0.00210023
YBR019C	GAL10	0.192132	18	0.00739866	0.0368666	0.00857721	0.0432499	0.0288333	0.060521
YBR020W	GAL1	0.0640441	31	0.001432	0.0524512	0.00182485	0.0615329	0.0410219	0.0650608
YBR021W	FUR4	0.128088	21	0.00422781	0.0463055	0.00501351	0.0543231	0.0362154	0.0688454
YBR022W	POA1	1.47301	19	0.0537377	0.072676	0.0627732	0.0852595	0.0568397	0.0302955
YBR023C	CHS3	0.384265	22	0.0121069		0.014464
YBR024W	SCO2	2.27357	40	0.0393979	0.0693915	0.053344	0.0814063	0.0542708	0.0491151
YBR025C		25.2654			0.164878		0.193426	0.128951	0.152678
YBR026C	ETR1	2.7539	79	0.0241627	0.0426446	0.0410553	0.0500284	0.0333522	0.0380883
YBR027C			35
YBR028C			9		0.0933755		0.109543	0.0730287	0.115166
YBR029C	CDS1	2.04941	23	0.0617628	0.0284998	0.0743339	0.0334344	0.0222896	0.0306036
YBR030W		1.02471	29	0.0244921	0.10994	0.0307777	0.128975	0.0859836	0.142561
YBR031W	RPL4A	88.1247	7	8.7262		9.26676
YBR032W		0.352243	24	0.0101732	0.255178	0.0123338	0.299361	0.199574	0.0602714
YBR033W		0.128088	31	0.002864	0.0423834	0.0036497	0.0497219	0.0331479	0.0914551
YBR034C	HMT1	5.50779	6	0.636285	0.175003	0.67007	0.205303	0.136869	0.143165
YBR035C	PDX3	2.43368	29	0.0581688	0.155003	0.0730971	0.181841	0.121227	0.0831619
YBR036C	CSG2	6.75665	14	0.334525	0.112614	0.375971	0.132113	0.0880753	0.108509
YBR037C	SCO1	0.608419			0.0872815		0.102394	0.0682626	0.0605489
YBR038W	CHS2	1.02471			0.0342052		0.0401277	0.0267518	0.0773394
YBR039W	ATP3	4.73926	19	0.172895	0.115566	0.201966	0.135575	0.0903836	0.0845087
YBR040W	FIG1	0.192132	71	0.00187572		0.00305427
YBR041W	FAT1	0.896617			0.112842		0.13238	0.0882533	0.177301
YBR042C		2.01739	11	0.127122		0.139497
YBR043C	QDR3	0.896617	11	0.0564989	0.158926	0.0619988	0.186444	0.124296	0.257168
YBR044C	TCM62	0.768529	17	0.0313355	0.104995	0.0360497	0.123174	0.082116	0.141322
YBR045C	GIP1	0.128088
YBR046C	ZTA1	2.43368	19	0.088784	0.0542955	0.103712	0.0636965	0.0424643	0.0426342
YBR047W		1.24886
YBR048W	RPS11B	10.3431	32	0.224041	0.343158	0.287486	0.402574	0.268383	0.263283
YBR049C	REB1	1.28088	8	0.11098	0.136425	0.118837	0.160046	0.106698	0.259489
YBR050C	REG2	0.192132	56	0.00237814	0.0572953	0.00355669	0.0672157	0.0448105	0.0455274
YBR051W		0.0640441
YBR052C	RFS1	10.3431	33	0.217252	0.17138	0.280697	0.201053	0.134036	0.0847105
YBR053C		4.355	66	0.0457372	0.0332782	0.072451	0.0390402	0.0260268	0.0280048
YBR054W	YRO2	9.19033	100	0.0637025	0.0664845	0.120076	0.077996	0.0519974	0.0537653
YBR055C	PRP6	2.27357	9	0.175102		0.189048
YBR056C-B
YBR056W		3.97073	43	0.064007		0.0883637
YBR056W-A
YBR057C	MUM2	0.672463	11	0.0423742	0.108968	0.0464991	0.127835	0.0852235	0.0937459
YBR058C	UBP14	2.49772	22	0.0786949	0.0985494	0.094016	0.115613	0.0770752	0.180741
YBR058C-A	TSC3	11.7521
YBR059C	AKL1	1.40897	29	0.0336767	0.0485312	0.0423194	0.0569341	0.0379561	0.126242
YBR060C	ORC2	1.34493			0.111709		0.131051	0.0873671	0.162677
YBR061C	TRM7	1.18482	10	0.0821252	0.105184	0.0893929	0.123396	0.0822642	0.0766703
YBR062C		2.52974	29	0.0604649	0.175103	0.0759825	0.205421	0.136947	0.0854551
YBR063C		1.21684	34	0.0248073	0.0420275	0.0322714	0.0493043	0.0328695	0.0399036
YBR064W			34
YBR065C	ECM2	0.192132	21	0.00634171	0.0435812	0.00752026	0.0511271	0.0340847	0.0372887
YBR066C	NRG2	1.05673	173	0.00423392		0.0107159
YBR067C	TIP1	17.7402			0.276534		0.324415	0.216276	0.136687
YBR068C	BAP2	6.72463	13	0.358551	0.730631	0.3998	0.857136	0.571424	1.04513
YBR069C	TAT1	0.864595	20	0.0299646		0.0352681
YBR070C	ALG14	1.66515	21	0.0549615	0.0553845	0.0651756	0.0649741	0.043316	0.0308843
YBR071W		1.24886	26	0.033294	0.216642	0.0409546	0.254152	0.169435	0.107591
YBR072C-A		0.32022
YBR072W	HSP26	12.1684			0.0263225		0.0308801	0.0205868	0.0132579
YBR073W	RDH54	1.15279	10	0.0799056	0.0638885	0.0869769	0.0749505	0.049967	0.138609
YBR074W		2.01739	14	0.099882	0.0693059	0.112257	0.0813059	0.0542039	0.158817
YBR076C-A
YBR076W	ECM8		50
YBR077C	SLM4	1.50504	10	0.104321		0.113553
YBR078W	ECM33	6.72463	46	0.10133	0.848063	0.142579	0.994901	0.663267	1.15143
YBR079C	RPG1	2.59379	24	0.0749115	0.118824	0.0908219	0.139398	0.0929317	0.268944
YBR080C	SEC18	1.79323	13	0.0956135		0.106613
YBR081C	SPT7	1.40897			0.0940969		0.110389	0.0735929	0.294224
YBR082C	UBC4	37.1776	30	0.858985	0.481098	1.08703	0.564398	0.376265	0.203559
YBR083W	TEC1	0.672463	27	0.0172635		0.0213885
YBR084C-A	RPL19A		19		0.419633		0.49229	0.328194	0.352808
YBR084W	MIS1	4.89937	18	0.188666	0.152669	0.218719	0.179103	0.119402	0.349491
YBR085C-A		5.76397
YBR085W	AAC3	0.960661
YBR086C	IST2	2.04941	15	0.0947029		0.107274
YBR087W	RFC5	2.56176	13	0.136591		0.152305
YBR088C	POL30	4.73926	18	0.1825		0.211571
YBR089C-A	NHP6B	6.5325
YBR089W					0.0945549		0.110927	0.0739511	0.0442967
YBR090C			28		0.286017		0.33554	0.223693	0.162177
YBR091C	MRS5				0.150088		0.176076	0.117384	0.0386192
YBR092C	PHO3	10.0869	8	0.873967	0.328545	0.935841	0.385432	0.256954	0.360507
YBR093C	PHO5	6.91676	10	0.479433	0.0986515	0.521861	0.115733	0.077155	0.108249
YBR094W		0.704485	15	0.0325541	0.0544717	0.0368755	0.0639032	0.0426022	0.0963235
YBR095C	RXT2	0.576397	11	0.0363207	0.0908726	0.0398564	0.106607	0.0710712	0.0918239
YBR096W		5.21959	38	0.0952091	0.0399753	0.127226	0.0468968	0.0312646	0.0216351
YBR097W	VPS15	0.256176			0.0638009		0.0748478	0.0498985	0.217757
YBR098W	MMS4	0.864595
YBR099C
YBR101C	FES1	41.3405	79	0.362722	0.911985	0.616306	1.06989	0.713261	0.621964
YBR102C	EXO84	1.66515	19	0.0607469	0.0860178	0.070961	0.100911	0.0672743	0.152107
YBR103C-A
YBR103W	SIF2		10		0.114361		0.134162	0.0894416	0.143733
YBR104W	YMC2	0.864595	8	0.0749115	0.0534957	0.0802149	0.0627582	0.0418388	0.0413786
YBR105C	VID24	2.97805	11	0.187657	0.0817028	0.205925	0.0958493	0.0638995	0.0695227
YBR106W	PHO88	11.688	16	0.506346	0.638256	0.578041	0.748767	0.499178	0.282535
YBR107C	IML3	0.800551	10	0.05549	0.0947338	0.0604006	0.111137	0.0740911	0.0546051
YBR108W		1.28088	26	0.0341477	0.0762456	0.0420047	0.0894472	0.0596315	0.169532
YBR109C	CMD1	21.3907	22	0.673951	0.162478	0.805163	0.190611	0.127074	0.0562937
YBR109W-A
YBR110W	ALG1	1.85728	9	0.143041	0.0351313	0.154433	0.0412142	0.0274761	0.0370653
YBR111C	YSA1	30.485	24	0.880441	0.0897692	1.06744	0.105312	0.0702082	0.0487947
YBR111W-A	SUS1	3.39434
YBR112C	CYC8	1.82526	21	0.0602463	0.530961	0.0714425	0.622895	0.415263	1.20426
YBR113W		0.288198	17	0.0117508	0.115423	0.0135186	0.135408	0.090272	0.0435111
YBR114W	RAD16	0.608419	19	0.022196	0.0536489	0.0259281	0.0629379	0.0419586	0.0995258
YBR115C	LYS2	1.66515	18	0.0641218	0.115497	0.0743358	0.135495	0.0903298	0.377398
YBR116C		0.0640441	113	0.000392849	0.146061	0.000785699	0.171351	0.114234	0.0602014
YBR117C	TKL2		59		0.0638424		0.0748965	0.049931	0.102109
YBR118W	TEF2	82.9051	45	1.27701	0.267869	1.78555	0.31425	0.2095	0.288272
YBR119W	MUD1	2.36963	22	0.0746592	0.13164	0.0891947	0.154432	0.102955	0.101411
YBR120C	CBP6	4.86735	23	0.146687	0.0579173	0.176543	0.0679454	0.0452969	0.0221049
YBR121C	GRS1	15.3065	27	0.392951	0.340132	0.486842	0.399024	0.266016	0.532831
YBR121C-A
YBR122C	MRPL36	3.45838	16	0.149823	0.16183	0.171037	0.18985	0.126567	0.06746
YBR123C	TFC1	0.704485	13	0.0375624	0.0961993	0.0418838	0.112856	0.0752372	0.146637
YBR124W		0.0640441			0.0423845		0.0497232	0.0331488	0.0119004
YBR125C	PTC4	0.416287			0.0776082		0.0910457	0.0606972	0.0716833
YBR126C	TPS1	12.5526	103	0.0844741		0.161473
YBR126W-A
YBR126W-B
YBR127C	VMA2	6.94878	38	0.126751	0.171678	0.169375	0.201403	0.134269	0.20852
YBR128C	ATG14	0.288198	57	0.00350463	0.056344	0.00527245	0.0660997	0.0440665	0.0455647
YBR129C	OPY1	1.21684	26	0.0324403	0.0931959	0.0399044	0.109332	0.0728882	0.0718678
YBR130C	SHE3	0.672463	14	0.033294	0.1091	0.0374189	0.12799	0.0853265	0.108962
YBR131C-A
YBR131W	CCZ1	0.448309	21	0.0147973	0.0354537	0.0175473	0.0415923	0.0277282	0.0586175
YBR132C	AGP2	0.32022	39	0.00569128		0.00765553
YBR133C	HSL7	1.28088	8	0.11098	0.0859304	0.118837	0.100809	0.0672059	0.166872
YBR134W		0.0640441	23	0.00193009	0.0518	0.00232294	0.0607689	0.0405126	0.0162456
YBR135W	CKS1	1.50504	17	0.0613654	0.104447	0.0705974	0.122532	0.081688	0.036923
YBR136W	MEC1	0.352243			0.0485384		0.0569426	0.0379617	0.269756
YBR137W		3.65051	34	0.0744219	0.0649182	0.0968143	0.0761585	0.0507723	0.0273663
YBR138C		0.512353
YBR139W		0.992683	64	0.0107512	0.0721126	0.0168403	0.0845985	0.056399	0.0860649
YBR140C	IRA1	1.40897	38	0.0257006	0.0450802	0.0343433	0.0528856	0.0352571	0.327115
YBR141C		0.288198			0.079068		0.0927582	0.0618388	0.0626427
YBR141W-A
YBR142W	MAK5	1.82526			0.134123		0.157346	0.104897	0.243467
YBR143C	SUP45	9.54257	10	0.661441	0.138664	0.719975	0.162673	0.108449	0.142393
YBR144C		0.16011			0.0558544		0.0655253	0.0436835	0.0137166
YBR145W	ADH5	4.25893	50	0.0590413	0.048116	0.0851658	0.056447	0.0376314	0.0397011
YBR146W	MRPS9	5.76397			0.0987001		0.11579	0.0771931	0.0645334
YBR147W		0.640441
YBR148W	YSW1	0.224154	34	0.00456976		0.00594474
YBR149W	ARA1	11.1117	22	0.350091	0.0815504	0.418251	0.0956705	0.0637804	0.0659489
YBR150C	TBS1	4.09882
YBR151W	APD1	6.88474	12	0.397678	0.105736	0.43991	0.124044	0.0826962	0.0785614
YBR152W	SPP381	0.192132			0.101001		0.118489	0.0789928	0.0691187
YBR153W	RIB7	0.800551	7	0.0792714	0.176976	0.084182	0.207618	0.138412	0.101595
YBR154C	RPB5	5.12353	4	0.88784	0.2804	0.919268	0.32895	0.2193	0.141887
YBR155W	CNS1	0.672463	7	0.066588		0.0707129
YBR156C	SLI15	0.512353	39	0.00910605	0.067441	0.0122488	0.0791181	0.0527454	0.110554
YBR157C	ICS2	1.69717			0.115519		0.13552	0.0903469	0.0692961
YBR158W	AMN1	6.37239	4	1.10425	0.355265	1.14334	0.416778	0.277852	0.458178
YBR159W		2.97805	17	0.121425	0.076196	0.139693	0.089389	0.0595927	0.0621552
YBR160W	CDC28	1.66515	16	0.072137	0.123526	0.0823511	0.144914	0.0966092	0.0865618
YBR161W	CSH1	0.768529	23	0.023161	0.0381236	0.0278752	0.0447246	0.0298164	0.0336925
YBR162C	TOS1	7.269	35	0.143957	0.139286	0.188545	0.163403	0.108935	0.148914
YBR162W-A	YSY6	22.8958	14	1.13358		1.27402
YBR163W	DEM1	0.384265	15	0.0177568	0.0407672	0.0201139	0.0478258	0.0318839	0.05602
YBR164C	ARL1	5.47577	14	0.271108	0.115757	0.304697	0.135799	0.0905329	0.0498836
YBR165W	UBS1	0.192132	30	0.0044392	0.0617322	0.00561775	0.0724208	0.0482806	0.0402177
YBR166C	TYR1	1.79323	42	0.0295947	0.0661005	0.0405944	0.0775455	0.051697	0.0702045
YBR167C	POP7	0.640441	71	0.00625239	0.068926	0.0101809	0.0808603	0.0539069	0.0227487
YBR168W	PEX32	0.576397			0.0271977		0.0319069	0.0212713	0.0263976
YBR169C	SSE2	8.90213			0.0809373		0.0949512	0.0633008	0.131729
YBR170C	NPL4	2.08143	42	0.0343509		0.0471185
YBR171W	SEC66	4.80331	13	0.256108	0.0682528	0.285571	0.0800705	0.0533803	0.0330958
YBR172C	SMY2	1.47301	3	0.340339	0.263901	0.349374	0.309594	0.206396	0.458613
YBR173C	UMP1	3.17018	21	0.104638	0.367958	0.124084	0.431669	0.287779	0.128349
YBR174C			93		0.144902		0.169992	0.113328	0.0355849
YBR175W	SWD3	1.79323	59	0.0210674	0.0837994	0.0320672	0.0983089	0.0655393	0.0620657
YBR176W	ECM31	1.63312			0.037012		0.0434205	0.028947	0.0271523
YBR177C	EHT1	4.29095	31	0.095944		0.122265
YBR178W		0.192132	34	0.00391694	0.0805234	0.00509549	0.0944657	0.0629771	0.0235534
YBR179C	FZO1	1.66515	26	0.044392	0.0627905	0.0546061	0.0736624	0.0491083	0.126061
YBR180W	DTR1	0.0640441			0.0338471		0.0397076	0.0264717	0.0454785
YBR181C	RPS6B		24		0.223228		0.261879	0.174586	0.18541
YBR182C	SMP1	0.256176
YBR182C-A		0.128088
YBR183W	YPC1	1.34493	71	0.01313	0.0408994	0.0213799	0.0479809	0.0319873	0.0303879
YBR184W		0.0640441
YBR185C	MBA1	3.2022	23	0.0965043	0.0557055	0.116147	0.0653507	0.0435671	0.0364221
YBR186W	PCH2	0.0640441			0.0185468		0.0217581	0.0145054	0.0262113
YBR187W		7.5572	14	0.374161	0.240642	0.420517	0.282308	0.188205	0.158469
YBR188C	NTC20	0.896617	16	0.038843	0.0801644	0.0443429	0.0940445	0.0626963	0.0264579
YBR189W	RPS9B	52.0038	18	2.00257		2.32157
YBR190W			73		0.0635392		0.0745407	0.0496938	0.0154548
YBR191W	RPL21A	60.7138	23	1.82972	0.529885	2.20214	0.621632	0.414421	0.360546
YBR191W-A
YBR192W	RIM2	0.864595	21	0.0285377	0.155377	0.0338412	0.182279	0.12152	0.137682
YBR193C	MED8	3.42636	15	0.158331		0.179349
YBR194W		1.05673	32	0.0228896	0.203203	0.0293716	0.238387	0.158924	0.058961
YBR195C	MSI1	0.768529	9	0.0591893	0.0684407	0.0639035	0.0802909	0.0535273	0.0678726
YBR196C	PGI1	61.3222	59	0.720429	0.793967	1.09658	0.931439	0.620959	1.03328
YBR196C-A		0.480331
YBR196C-B		0.288198
YBR197C		1.08875	21	0.0359364	0.185821	0.0426148	0.217995	0.14533	0.0949003
YBR198C	TAF5	2.11346	13	0.112687		0.125651
YBR199W	KTR4	5.44375	19	0.198596	0.0905362	0.231988	0.106212	0.0708081	0.0987065
YBR200W	BEM1	0.960661	4	0.16647		0.172363
YBR200W-A		0.0640441
YBR201C-A		1.12077
YBR201W	DER1	1.24886	31	0.027924	0.0677193	0.0355846	0.0794446	0.052963	0.0336315
YBR202W	CDC47	0.448309			0.179502		0.210582	0.140388	0.356164
YBR203W	COS111	0.16011			0.0302586		0.0354977	0.0236651	0.0656471
YBR204C		2.65783	29	0.0635265		0.0798297
YBR205W	KTR3		14
YBR206W			29		0.151732		0.178003	0.118669	0.03833
YBR207W	FTH1	4.80331	17	0.195847	0.130659	0.225311	0.153282	0.102188	0.142757
YBR208C	DUR1,2	1.28088			0.0915716		0.107427	0.0716179	0.3944
YBR209W		0.0640441	35	0.00126834		0.00166119
YBR210W	ERV15	1.69717	24	0.0490161	0.0496058	0.0594267	0.0581948	0.0387966	0.0166049
YBR211C	AME1	1.47301	25	0.0408406	0.0509001	0.0498762	0.0597132	0.0398088	0.0387738
YBR212W	NGR1	4.00276	56	0.0495446	0.0886762	0.0740977	0.10403	0.0693534	0.139955
YBR213W	MET8	0.384265			0.0399363		0.046851	0.031234	0.0257368
YBR214W	SDS24	2.68985	67	0.0278278	0.0960395	0.0443275	0.112668	0.0751122	0.118903
YBR215W	HPC2	0.640441	7	0.0634171	0.0907883	0.0673456	0.106508	0.0710053	0.139241
YBR216C	YBP1	0.960661	43	0.0154856	0.0630866	0.0213783	0.0740097	0.0493398	0.0998638
YBR217W	ATG12	1.40897	28	0.0348794	0.0627747	0.0435221	0.0736439	0.0490959	0.0274937
YBR218C	PYC2	2.43368	33	0.051118		0.0660463
YBR219C		0.0640441	26	0.00170738	0.0654498	0.00210023	0.0767822	0.0511881	0.0411552
YBR220C			12		0.120351		0.141189	0.0941263	0.15832
YBR221C	PDB1	10.5032	25	0.291211		0.355639
YBR221W-A
YBR222C	PCS60		26
YBR223C	TDP1		34		0.0640772		0.0751719	0.0501146	0.0818873
YBR223W-A
YBR224W					0.049473		0.0580391	0.0386927	0.0199267
YBR225W			26		0.073944		0.086747	0.0578314	0.15626
YBR226C
YBR227C	MCX1		13
YBR228W	SLX1	0.288198
YBR229C	ROT2	1.56908	19	0.0572423	0.0302137	0.0668671	0.0354451	0.02363	0.0676764
YBR230C	OM14	5.12353	37	0.0959827		0.127411
YBR230W-A		1.8893
YBR231C	SWC5	0.352243	15	0.0162771		0.0184377
YBR232C			32		0.0271477		0.0318482	0.0212321	0.00762234
YBR233W	PBP2	0.640441			0.0564761		0.0662547	0.0441698	0.0548148
YBR233W-A	DAD3	1.18482
YBR234C	ARC40	5.86003	35	0.116053	0.0995882	0.151999	0.116831	0.0778876	0.0898823
YBR235W		1.92132	10	0.133176	0.0812736	0.144961	0.0953457	0.0635638	0.213701
YBR236C	ABD1	1.95334			0.0964252		0.113121	0.0754139	0.0987922
YBR237W	PRP5	0.864595	14	0.0428066	0.0939165	0.04811	0.110178	0.0734518	0.187229
YBR238C		0.736507	26	0.0196349	0.225578	0.0241527	0.264636	0.176424	0.387251
YBR239C		0.576397	11	0.0363207	0.0981942	0.0398564	0.115196	0.0767974	0.122031
YBR240C	THI2	0.032022
YBR241C		0.704485	26	0.0187812		0.0231026
YBR242W			16		0.127619		0.149715	0.0998102	0.0714641
YBR243C	ALG7		12		0.0317138		0.0372049	0.0248033	0.0333852
YBR244W	GPX2	9.95886	12	0.575246		0.636334
YBR245C	ISW1	1.40897			0.0807309		0.094709	0.0631394	0.213979
YBR246W			15		0.0400386		0.046971	0.031314	0.0364182
YBR247C	ENP1	1.34493	10	0.0932232	0.200504	0.101473	0.23522	0.156814	0.227537
YBR248C	HIS7	5.3797	11	0.338993	0.192248	0.371993	0.225535	0.150356	0.249291
YBR249C	ARO4	10.2791	29	0.245687	0.164142	0.308739	0.192563	0.128375	0.142753
YBR250W		0.128088
YBR251W	MRPS5	2.27357	14	0.112565	0.145146	0.126512	0.170277	0.113518	0.104777
YBR252W	DUT1	2.56176	15	0.118379	0.250464	0.134093	0.29383	0.195887	0.0867779
YBR253W	SRB6	1.44099	24	0.0416175	0.174662	0.0504566	0.204904	0.136602	0.0498599
YBR254C	TRS20	1.37695			0.124411		0.145953	0.0973017	0.051278
YBR255C-A					0.126839		0.148801	0.0992006	0.0452355
YBR255W			18		0.0874725		0.102618	0.068412	0.142571
YBR256C	RIB5	5.34768	22	0.168488	0.118297	0.201291	0.13878	0.0925198	0.0662442
YBR257W	POP4		12		0.0639156		0.0749823	0.0499882	0.0419401
YBR258C	SHG1		14		0.114921		0.13482	0.0898797	0.0384685
YBR259W		0.800551	14	0.0396357		0.0445463
YBR260C	RGD1	0.704485	10	0.0488312	0.0722644	0.0531525	0.0847766	0.0565178	0.113036
YBR261C		3.58647	15	0.16573	0.160601	0.18773	0.188409	0.125606	0.0876729
YBR262C		1.40897	13	0.0751249	0.459482	0.0837676	0.539039	0.35936	0.114995
YBR263W	SHM1		33		0.14799		0.173614	0.115742	0.170373
YBR264C	YPT10		16		0.120836		0.141758	0.0945056	0.0566089
YBR265W	TSC10	2.1775	9	0.167703	0.218545	0.18106	0.256385	0.170923	0.164428
YBR266C	SLM6		4		0.195571		0.229434	0.152956	0.069136
YBR267W	REI1	1.53706	10	0.106541	0.473665	0.115969	0.555678	0.370452	0.437504
YBR268W	MRPL37	4.03478	15	0.186446	0.191965	0.211196	0.225202	0.150135	0.0475928
YBR269C		0.736507	17	0.0300299	0.150445	0.0345476	0.176494	0.117663	0.0489478
YBR270C		0.256176	23	0.00772035	0.0402782	0.00929174	0.0472522	0.0315015	0.0515679
YBR271W		0.640441	12	0.0369933	0.0639752	0.0409218	0.0750522	0.0500348	0.0629938
YBR272C	HSM3	0.256176	19	0.00934568		0.0109171
YBR273C	UBX7	2.24154	21	0.0739866	0.0995949	0.0877364	0.116839	0.0778929	0.10204
YBR274W	CHK1	1.08875	16	0.0471665	0.0361901	0.0538449	0.0424562	0.0283041	0.0448054
YBR275C	RIF1	1.69717			0.0896615		0.105186	0.070124	0.403213
YBR276C	PPS1	2.72187	9	0.209629		0.226325
YBR277C			18
YBR278W	DPB3	4.32298	6	0.49941	0.107737	0.525927	0.126392	0.0842611	0.050978
YBR279W	PAF1	1.53706	10	0.106541	0.157751	0.115969	0.185065	0.123376	0.164954
YBR280C	SAF1	1.28088
YBR281C		3.04209	11	0.191693	0.0681741	0.210353	0.0799781	0.0533187	0.140548
YBR282W	MRPL27	2.78592			0.0795848		0.0933646	0.0622431	0.0273869
YBR283C	SSH1	5.79599	14	0.286962	0.139135	0.322515	0.163225	0.108817	0.160179
YBR284W		0.0640441	42	0.00105695	0.0181781	0.0014498	0.0213255	0.014217	0.0340213
YBR285W		0.192132
YBR286W	APE3	14.538	26	0.387576	0.388417	0.476753	0.45567	0.30378	0.489997
YBR287W		4.54713	31	0.101672	0.216631	0.129564	0.25414	0.169427	0.217374
YBR288C	APM3	1.50504	11	0.0948374	0.0762788	0.104069	0.0894862	0.0596574	0.0865629
YBR289W	SNF5	0.960661	32	0.0208087	0.140969	0.0267015	0.165377	0.110251	0.299553
YBR290W	BSD2	1.92132			0.188639		0.221301	0.147534	0.14237
YBR291C	CTP1	1.24886	5	0.173129	0.123736	0.180789	0.14516	0.0967733	0.0869992
YBR292C		0.608419
YBR293W	VBA2	1.63312			0.0436518		0.0512099	0.0341399	0.0486153
YBR294W	SUL1	0.0640441	6	0.00739866	0.0463837	0.00779151	0.0544149	0.0362766	0.0935573
YBR295W	PCA1	0.704485	29	0.0168383	0.0558329	0.0211597	0.0655001	0.0436667	0.159384
YBR296C	PHO89	1.15279	21	0.0380503		0.0451216
YBR296C-A		0.0640441
YBR297W	MAL33	0.352243	28	0.00871985		0.0108805
YBR298C	MAL31	0.256176	18	0.00986489	0.047948	0.0114363	0.0562499	0.0375	0.0691499
YBR298C-A
YBR299W	MAL32		49		0.0198638		0.0233031	0.0155354	0.0272491
YBR300C		0.0640441			0.0905039		0.106174	0.0707828	0.0351791
YBR301W	DAN3				0.02094		0.0245657	0.0163771	0.00592851
YBR302C	COS2		13
YCL001W	RER1	8.45382	26	0.225375		0.277231
YCL001W-A		0.256176
YCL001W-B		0.128088
YCL002C		2.08143	15	0.0961826	0.0505414	0.10895	0.0592924	0.0395283	0.032848
YCL004W	PGS1	1.50504	35	0.029806	0.0595411	0.039038	0.0698504	0.0465669	0.0728773
YCL005W	LDB16	2.11346	9	0.162771	0.0737431	0.175735	0.0865113	0.0576742	0.0444092
YCL005W-A	VMA9
YCL007C			28		0.165758		0.194458	0.129639	0.0508183
YCL008C	STP22	1.18482	26	0.0315866	0.0923439	0.0388543	0.108333	0.0722219	0.0835607
YCL009C	ILV6	4.54713	41	0.0768739		0.104766
YCL010C	SGF29	0.288198	19	0.0105139	0.217948	0.0122817	0.255685	0.170457	0.132786
YCL011C	GBP2	5.21959	17	0.21282	0.219646	0.244838	0.257677	0.171785	0.2204
YCL012C		1.53706
YCL014W	BUD3	0.32022	16	0.0138725	0.043196	0.0158367	0.0506752	0.0337834	0.165877
YCL016C	DCC1	0.192132	9	0.0147973	0.0755358	0.0159759	0.0886145	0.0590763	0.0674652
YCL017C	NFS1	4.25893	12	0.246006	0.0913048	0.27213	0.107114	0.0714092	0.106614
YCL018W	LEU2	0.0640441	68	0.000652823		0.00104567
YCL021W-A		0.576397			0.0626063		0.0734462	0.0489642	0.0184595
YCL022C			8		0.0485528		0.0569595	0.037973	0.0195561
YCL023C		0.0640441	18	0.00246622		0.00285907
YCL024W	KCC4	0.544375	7	0.0539046	0.0407974	0.0572438	0.0478613	0.0319075	0.0993281
YCL025C	AGP1	1.18482	3	0.273751	0.0870775	0.281018	0.102155	0.068103	0.129464
YCL026C-A	FRM2	0.128088
YCL026C-B					0.0340766		0.0399768	0.0266512	0.0154843
YCL027W	FUS1
YCL028W	RNQ1	3.26625	31	0.073032	0.0901876	0.0930673	0.105803	0.0705354	0.0858416
YCL029C	BIK1	1.05673	14	0.0523191	0.128786	0.0588011	0.151084	0.100723	0.133156
YCL030C	HIS4	4.41904	5	0.612609		0.639716
YCL031C	RRP7	4.0668	7	0.402699	0.204344	0.427645	0.239725	0.159817	0.142716
YCL032W	STE50	0.736507	6	0.0850846		0.0896024
YCL033C			27		0.104725		0.122858	0.0819054	0.0414441
YCL034W	LSB5		17		0.124068		0.145549	0.097033	0.103243
YCL035C	GRX1	26.0339	56	0.322238	0.221022	0.481932	0.259291	0.172861	0.0573898
YCL036W	GFD2	0.288198
YCL037C	SRO9	0.480331	17	0.0195847	0.350339	0.0225311	0.410999	0.273999	0.357295
YCL038C	ATG22		28		0.0244503		0.0286838	0.0191225	0.0303283
YCL039W	GID7
YCL040W	GLK1	14.506	60	0.16758		0.25656
YCL041C			27
YCL042W			82
YCL043C	PDI1	7.33305	21	0.242042	0.349479	0.287023	0.409989	0.273326	0.428576
YCL044C	MGR1	0.192132	25	0.00532704	0.0670114	0.00650559	0.0786141	0.0524094	0.065669
YCL045C		4.99544	16	0.216411		0.247053
YCL046W			22		0.338879		0.397554	0.265036	0.0856066
YCL047C		4.00276	24	0.115604	0.037998	0.140157	0.0445772	0.0297181	0.0230612
YCL048W	SPS22	0.640441	57	0.00778807	0.0538213	0.0117166	0.0631403	0.0420935	0.0585521
YCL048W-A		0.0640441
YCL049C		1.05673	10	0.0732468		0.0797288
YCL050C	APA1	10.6313	35	0.210545	0.195034	0.275758	0.228803	0.152535	0.147197
YCL051W	LRE1	1.28088	18	0.0493244	0.141618	0.0571814	0.166139	0.110759	0.19394
YCL052C	PBN1	5.47577	20	0.189776	0.040107	0.223364	0.0470513	0.0313676	0.0392095
YCL054W	SPB1	1.79323	6	0.207163	0.275817	0.218162	0.323573	0.215715	0.544681
YCL055W	KAR4	1.47301			0.118185		0.138649	0.0924325	0.0930795
YCL056C			23		0.0934593		0.109641	0.0730942	0.0317229
YCL057C-A
YCL057W	PRD1		24		0.121857		0.142956	0.0953039	0.20376
YCL058C	FYV5		12
YCL058W-A
YCL059C	KRR1	3.74658	15	0.173129	0.132796	0.19611	0.155789	0.103859	0.0986662
YCL061C	MRC1	0.384265			0.0674565		0.0791363	0.0527575	0.173572
YCL063W	VAC17	0.512353	17	0.0208903	0.100578	0.0240331	0.117992	0.0786614	0.0999787
YCL064C	CHA1	6.91676	20	0.239717		0.282144
YCL065W		0.0640441			0.0658829		0.0772902	0.0515268	0.0189619
YCL066W	HMLALPHA1		10		0.0775117		0.0909326	0.0606217	0.0319476
YCL067C	HMLALPHA2		7
YCL068C			12		0.0233299		0.0273694	0.0182463	0.0142686
YCL069W	VBA3				0.028903		0.0339075	0.022605	0.0311045
YCL073C					0.0140977		0.0165387	0.0110258	0.0203646
YCL076W		0.0640441
YCR001W		0.224154	26	0.00597584		0.00735082
YCR002C	CDC10	6.37239	17	0.259824	0.103813	0.298912	0.121787	0.0811914	0.0785933
YCR003W	MRPL32	1.37695	20	0.0477214	0.117681	0.0561676	0.138057	0.0920377	0.0507128
YCR004C	YCP4	7.42912	29	0.177568		0.223138
YCR005C	CIT2	16.9076	42	0.279035	0.836948	0.382748	0.981861	0.654574	0.904622
YCR006C		0.448309	43	0.0072266	0.103821	0.00997655	0.121797	0.0811981	0.0384067
YCR007C		0.192132	35	0.00380503	0.0541921	0.00498358	0.0635753	0.0423835	0.0304737
YCR008W	SAT4	0.576397	26	0.0153665	0.130919	0.0189021	0.153587	0.102391	0.185431
YCR009C	RVS161	6.18026			0.188083		0.220648	0.147099	0.117238
YCR010C	ADY2	0.0640441			0.0172767		0.0202681	0.0135121	0.0114988
YCR011C	ADP1	0.832573	52	0.011098		0.016205
YCR012W	PGK1		70		1.13698		1.33384	0.889229	1.11154
YCR013C			58
YCR014C	POL4	0.672463	29	0.016073	0.075024	0.0201979	0.0880141	0.0586761	0.102566
YCR015C		1.08875			0.0712089		0.0835384	0.0556923	0.0530747
YCR016W		1.6011	19	0.0584105	0.0998768	0.0682317	0.11717	0.0781133	0.0681148
YCR017C	CWH43	3.13816			0.0911304		0.106909	0.0712728	0.203912
YCR018C	SRD1	3.90669
YCR018C-A
YCR019W	MAK32		17		0.0314328		0.0368752	0.0245835	0.0268206
YCR020C	PET18				0.0201814		0.0236757	0.0157838	0.0102121
YCR020C-A	MAK31	2.08143			0.105732		0.124039	0.0826927	0.0219962
YCR020W-B	HTL1	1.08875
YCR021C	HSP30	15.7228
YCR022C		0.0640441	74	0.000599892		0.000992741
YCR023C		0.384265	23	0.0115805	0.0991363	0.0139376	0.116301	0.0775342	0.142275
YCR024C	SLM5	0.512353	33	0.0107617	0.0467496	0.0139045	0.054844	0.0365627	0.0540396
YCR024C-A	PMP1		20
YCR024C-B		20.5582
YCR025C		0.0640441	78	0.000569128	0.0763804	0.000961977	0.0896053	0.0597369	0.0244921
YCR026C	NPP1	0.576397	18	0.022196	0.184571	0.0257316	0.216529	0.144353	0.321617
YCR027C	RHB1	0.480331	11	0.0302673	0.102651	0.0332136	0.120425	0.0802834	0.0504982
YCR028C	FEN2	1.24886	29	0.0298498	0.0298479	0.0375103	0.0350159	0.0233439	0.035903
YCR028C-A	RIM1	8.48584	29	0.202825		0.254878
YCR030C	SYP1	0.544375	25	0.0150933		0.0184325
YCR031C	RPS14A		35		0.250732		0.294145	0.196097	0.14119
YCR032W	BPH1	0.32022
YCR033W	SNT1	1.05673	20	0.0366234	0.179089	0.0431054	0.210097	0.140065	0.515438
YCR034W	FEN1	6.91676	11	0.435849	0.0458551	0.478276	0.0537947	0.0358632	0.0374053
YCR035C	RRP43	3.90669	17	0.159289	0.158644	0.183253	0.186112	0.124075	0.146905
YCR036W	RBK1	4.61117	18	0.177568	0.179584	0.205853	0.210678	0.140452	0.140593
YCR037C	PHO87	1.95334	12	0.11283	0.157505	0.124812	0.184777	0.123184	0.341344
YCR038C	BUD5	0.704485	31	0.015752		0.0200733
YCR038W-A
YCR039C	MATALPHA2		10		0.0427746		0.0501808	0.0334539	0.0211428
YCR040W	MATALPHA1		8
YCR041W			31		0.0543295		0.0637364	0.0424909	0.014107
YCR042C	TAF2				0.0324105		0.0380222	0.0253481	0.107045
YCR043C		3.13816
YCR044C	PER1	2.52974	13	0.134883		0.150401
YCR045C		0.0640441			0.106099		0.12447	0.08298	0.122396
YCR045W-A
YCR046C	IMG1	1.02471	5	0.142054	0.166442	0.14834	0.19526	0.130173	0.0662583
YCR047C	BUD23	1.02471	10	0.0710272	0.168578	0.0773128	0.197766	0.131844	0.109035
YCR047W-A
YCR048W	ARE1				0.0897282		0.105264	0.0701761	0.128563
YCR049C			12		0.0636237		0.0746398	0.0497599	0.0221929
YCR050C			12
YCR051W		2.30559	9	0.177568		0.191711
YCR052W	RSC6	1.79323	11	0.112998	0.129664	0.123998	0.152115	0.10141	0.147146
YCR053W	THR4	18.7329	16	0.811541	0.117796	0.926449	0.138191	0.0921275	0.142245
YCR054C	CTR86	1.12077	12	0.0647383		0.0716132
YCR057C	PWP2	1.37695	6	0.159071		0.167518
YCR059C	YIH1	1.85728	12	0.107281		0.118673
YCR060W	TAH1	1.95334	14	0.0967111	0.194206	0.108693	0.227832	0.151888	0.0508825
YCR061W		0.704485	15	0.0325541	0.0391487	0.0368755	0.0459271	0.0306181	0.0580213
YCR063W	BUD31	0.192132	34	0.00391694	0.31376	0.00509549	0.368087	0.245391	0.11607
YCR064C		0.0640441	15	0.00295947	0.154508	0.00335232	0.18126	0.12084	0.0495443
YCR065W	HCM1	0.128088	5	0.0177568	0.170099	0.0185425	0.199551	0.133034	0.225359
YCR066W	RAD18	0.576397	17	0.0235016	0.0541292	0.0270373	0.0635015	0.0423343	0.0619351
YCR067C	SED4	2.04941			0.0393655		0.0461815	0.0307877	0.0984281
YCR068W	ATG15	0.224154	11	0.0141247	0.0966292	0.0154997	0.11336	0.0755734	0.118046
YCR069W	CPR4		15		0.124161		0.145659	0.0971062	0.0928335
YCR071C	IMG2		16		0.141971		0.166553	0.111035	0.0488555
YCR072C	RSA4	1.40897	9	0.108514	0.150193	0.117156	0.176198	0.117465	0.181719
YCR073C	SSK22	0.576397	11	0.0363207		0.0398564
YCR073W-A	SOL2	2.40165	19	0.0876158		0.102348
YCR075C	ERS1	0.256176	52	0.00341477	0.0653081	0.00498617	0.076616	0.0510773	0.0399425
YCR075W-A
YCR076C			24		0.0838664		0.0983875	0.0655917	0.0493249
YCR077C	PAT1	1.63312	14	0.0808568		0.0908745
YCR079W		0.736507			0.131135		0.15384	0.10256	0.1362
YCR081C-A
YCR081W	SRB8		15
YCR082W	AHC2	7.01283	17	0.285937	0.126327	0.328954	0.1482	0.0988001	0.0381368
YCR083W	TRX3	1.44099			0.127731		0.149847	0.0998977	0.0382608
YCR084C	TUP1	3.13816	12	0.181267	0.142604	0.200517	0.167296	0.111531	0.238787
YCR085W		0.192132
YCR086W	CSM1		17		0.0950899		0.111554	0.0743695	0.0425394
YCR087C-A
YCR087W			14		0.114813		0.134693	0.0897952	0.0462445
YCR088W	ABP1	3.58647	39	0.0637423	0.282351	0.0857419	0.331238	0.220826	0.392628
YCR089W	FIG2
YCR090C			11
YCR091W	KIN82	0.896617	51	0.012186	0.0381204	0.0176859	0.0447208	0.0298139	0.0644576
YCR092C	MSH3	0.896617	8	0.077686		0.0831859
YCR093W	CDC39	0.448309
YCR094W	CDC50	0.576397	9	0.044392	0.0443873	0.0479276	0.0520727	0.0347151	0.0407903
YCR095C		1.79323	14	0.088784		0.0997838
YCR095W-A		0.32022
YCR096C	HMRA2		7		0.072189		0.0846882	0.0564588	0.0202687
YCR097W	HMRA1	10.8555	23	0.32715		0.393738
YCR097W-A		0.0640441
YCR098C	GIT1	0.0640441	18	0.00246622		0.00285907
YCR099C		0.128088	14	0.00634171		0.00712741
YCR100C			18		0.0525434		0.0616411	0.041094	0.0390393
YCR101C		0.0640441	18	0.00246622	0.0558453	0.00285907	0.0655147	0.0436764	0.0239347
YCR102C
YCR102W-A
YCR104W	PAU3		14		0.011805		0.013849	0.00923265	0.00345301
YCR105W	ADH7	0.512353
YCR106W	RDS1	0.192132
YCR107W	AAD3		19
YCR108C
YDL001W	RMD1	0.896617	13	0.0478068	0.0589932	0.0533066	0.0692076	0.0461384	0.0596108
YDL002C	NHP10	0.704485	24	0.0203463	0.286479	0.0246677	0.336082	0.224055	0.136897
YDL003W	MCD1	0.512353	10	0.0355136	0.139942	0.0386564	0.164172	0.109448	0.186061
YDL004W	ATP16	8.48584	17	0.345996	0.0584302	0.398049	0.0685471	0.0456981	0.0220265
YDL005C	MED2	1.6011	12	0.0924833	0.060553	0.102305	0.0710375	0.0473583	0.061329
YDL006W	PTC1	1.76121	28	0.0435993	0.113912	0.0544026	0.133635	0.0890899	0.075281
YDL007C-A		0.0640441
YDL007W	RPT2	7.46114	12	0.430972	0.122637	0.476739	0.143871	0.0959141	0.125935
YDL008W	APC11	1.34493	62	0.015036	0.148229	0.0232858	0.173894	0.115929	0.0576168
YDL009C			39
YDL010W			22		0.0736516		0.086404	0.0576027	0.0400339
YDL011C			16		0.135655		0.159143	0.106095	0.0342688
YDL012C		5.25162			0.149764		0.175695	0.11713	0.0479062
YDL013W	HEX3	0.576397			0.132538		0.155486	0.103657	0.192699
YDL014W	NOP1	9.47853	7	0.938573	0.110367	0.996715	0.129477	0.0863178	0.0848504
YDL015C	TSC13	9.09426	27	0.233469	0.093224	0.289254	0.109365	0.0729102	0.0679523
YDL016C			31		0.090123		0.105727	0.0704849	0.0212864
YDL017W	CDC7		6
YDL018C	ERP3	2.72187	16	0.117916	0.0362021	0.134612	0.0424704	0.0283136	0.0191683
YDL019C	OSH2	0.992683			0.0916287		0.107494	0.0716626	0.275973
YDL020C	RPN4	5.09151	36	0.0980323	0.676654	0.129264	0.793814	0.529209	0.844089
YDL021W	GPM2	0.896617			0.0556279		0.0652596	0.0435064	0.0406785
YDL022C-A
YDL022W	GPD1	9.31842	99	0.0652428	0.520019	0.122402	0.610058	0.406705	0.477879
YDL023C					0.408627		0.479379	0.319586	0.102267
YDL024C	DIA3	0.576397	70	0.00570754	0.0164124	0.00924319	0.0192541	0.0128361	0.0180475
YDL025C					0.0721807		0.0846785	0.0564523	0.105114
YDL025W-A
YDL026W		0.0640441
YDL027C		1.63312	77	0.0147012	0.0612645	0.0247189	0.0718722	0.0479148	0.0604685
YDL028C	MPS1	0.256176			0.0916005		0.107461	0.0716405	0.164343
YDL029W	ARP2	10.3111	39	0.183259	0.109743	0.246508	0.128744	0.0858294	0.111407
YDL030W	PRP9	0.768529
YDL031W	DBP10	0.800551	10	0.05549		0.0604006
YDL032W
YDL033C	SLM3	0.896617	12	0.0517906	0.463949	0.0572905	0.54428	0.362853	0.454655
YDL034W			32		0.0796974		0.0934966	0.0623311	0.0214419
YDL035C	GPR1	0.960661			0.118269		0.138747	0.0924981	0.266857
YDL036C	PUS9	0.448309	15	0.0207163		0.0234662
YDL037C	BSC1	1.05673	51	0.0143621	0.471859	0.0208441	0.55356	0.36904	0.363873
YDL038C			41
YDL039C	PRM7	2.52974	132	0.013284		0.0288015
YDL040C	NAT1	4.22691	14	0.209276	0.135145	0.235205	0.158545	0.105696	0.271006
YDL041W			34
YDL042C	SIR2	0.576397	12	0.033294	0.0618191	0.0368296	0.0725228	0.0483485	0.0816123
YDL043C	PRP11	0.448309			0.0599076		0.0702803	0.0468535	0.0374828
YDL044C	MTF2	0.128088	17	0.00522259	0.128415	0.00600829	0.150649	0.100433	0.132772
YDL045C	FAD1	3.13816	30	0.0725069	0.0767369	0.0917565	0.0900236	0.0600157	0.0552145
YDL045W-A	MRP10	2.49772	29	0.0596996	0.102141	0.0750207	0.119826	0.0798843	0.0229268
YDL046W	NPC2	4.13084	20	0.143164	0.159133	0.168503	0.186686	0.124457	0.0648423
YDL047W	SIT4	1.56908	12	0.0906336	0.334274	0.100258	0.392152	0.261435	0.244442
YDL048C	STP4	2.20952	24	0.0638135		0.0773668
YDL049C	KNH1	0.32022			0.0682164		0.0800278	0.0533519	0.0430016
YDL050C			17
YDL051W	LHP1		14
YDL052C	SLC1	2.24154	14	0.11098		0.12473
YDL053C	PBP4	6.88474	24	0.198839	0.105737	0.24107	0.124045	0.0826967	0.0460621
YDL054C	MCH1	1.18482	15	0.0547501		0.0620178
YDL055C	PSA1	106.153	12	6.13164	0.869167	6.78279	1.01966	0.679773	0.737553
YDL056W	MBP1	0.768529	10	0.0532704	0.101519	0.0579846	0.119096	0.0793975	0.198573
YDL057W		2.7539	63	0.0302993	0.0952059	0.0471918	0.11169	0.0744602	0.0734178
YDL058W	USO1	1.40897	29	0.0336767		0.0423194
YDL059C	RAD59	1.3129
YDL060W	TSR1	1.47301	9	0.113446	0.176024	0.122482	0.206501	0.137667	0.325721
YDL061C	RPS29B	74.5153	20	2.5825	0.181503	3.03958	0.212929	0.141953	0.024132
YDL062W		0.0640441	25	0.00177568	0.118382	0.00216853	0.13888	0.0925864	0.0393492
YDL063C		1.6011			0.111504		0.130811	0.0872073	0.16238
YDL064W	UBC9	2.33761	15	0.10802		0.122359
YDL065C	PEX19	2.84996	14	0.141103	0.209412	0.158585	0.245671	0.163781	0.168367
YDL066W	IDP1	3.68254	33	0.0773497	0.0529105	0.0999385	0.0620717	0.0413811	0.0532161
YDL067C	COX9	8.06956
YDL068W					0.0573191		0.0672436	0.0448291	0.0147488
YDL069C	CBS1	2.59379	20	0.0898938	0.0434489	0.105804	0.0509719	0.0339813	0.0234131
YDL070W	BDF2	4.29095	5	0.594853	0.439111	0.621173	0.515141	0.343428	0.658007
YDL071C		0.128088	16	0.005549	0.130652	0.0063347	0.153274	0.102183	0.0382163
YDL072C	YET3	8.06956	24	0.233058	0.184326	0.282557	0.216241	0.144161	0.0880822
YDL073W		3.33029	16	0.144274	0.069266	0.164702	0.0812591	0.0541727	0.160026
YDL074C	BRE1	4.09882	7	0.40587	0.160221	0.431012	0.187963	0.125309	0.263399
YDL075W	RPL31A	109.9	24	3.17403	0.514844	3.84816	0.603987	0.402658	0.306825
YDL076C	RXT3	1.08875	19	0.0397191	0.0912066	0.0463976	0.106999	0.0713324	0.0630578
YDL077C	VAM6	1.02471	31	0.022912		0.0291976
YDL078C	MDH3	3.93871	23	0.1187	0.201748	0.142861	0.23668	0.157787	0.162678
YDL079C	MRK1	0.192132	29	0.00459227	0.0534569	0.00577082	0.0627127	0.0418085	0.0751298
YDL080C	THI3	0.640441	25	0.0177568	0.0535211	0.0216853	0.062788	0.0418587	0.0765595
YDL081C	RPP1A	91.6471	18	3.52916	0.382141	4.09133	0.448308	0.298872	0.0956389
YDL082W	RPL13A	19.4054	18	0.747265	0.343006	0.866298	0.402397	0.268264	0.258607
YDL083C	RPS16B		24		0.538695		0.631968	0.421312	0.363592
YDL084W	SUB2	17.5801	37	0.329341	0.136082	0.437178	0.159644	0.106429	0.142615
YDL085C-A		2.40165
YDL085W	NDE2	0.256176	32	0.005549	0.0375031	0.0071204	0.0439966	0.0293311	0.048015
YDL086C-A
YDL086W		4.22691	19	0.154204	0.120565	0.180132	0.141441	0.0942938	0.0774152
YDL087C	LUC7	0.256176			0.107362		0.125951	0.0839676	0.0659145
YDL088C	ASM4	1.92132	22	0.0605345	0.240186	0.07232	0.281773	0.187849	0.297928
YDL089W		1.69717	23	0.0511473	0.0329679	0.0615578	0.0386761	0.0257841	0.0374901
YDL090C	RAM1	1.05673	10	0.0732468		0.0797288
YDL091C	UBX3	0.352243			0.0601505		0.0705653	0.0470435	0.0643085
YDL092W	SRP14	6.78867	12	0.392129	0.184331	0.433771	0.216247	0.144165	0.0634324
YDL093W	PMT5	1.34493	35	0.0266352	0.0414663	0.034885	0.048646	0.0324307	0.0723528
YDL094C			47		0.0306679		0.0359779	0.0239852	0.0122085
YDL095W	PMT1		18		0.19925		0.233749	0.155833	0.382258
YDL096C	OPI6		22		0.225656		0.264727	0.176485	0.057534
YDL097C	RPN6	6.46845	11	0.407599	0.345441	0.447277	0.405253	0.270169	0.3523
YDL098C	SNU23	0.576397	26	0.0153665	0.085862	0.0189021	0.100729	0.0671524	0.039217
YDL099W	BUG1	1.66515	11	0.104927	0.216673	0.115141	0.254189	0.169459	0.173696
YDL100C	GET3	20.2059	36	0.389046	0.254909	0.51299	0.299045	0.199363	0.212123
YDL101C	DUN1	1.08875			0.0808173		0.0948105	0.063207	0.097402
YDL102W	CDC2	0.32022	41	0.00541366		0.0073779
YDL103C	QRI1	3.4904	21	0.115208	0.0822304	0.136618	0.0964682	0.0643122	0.0921593
YDL104C	QRI7				0.111994		0.131386	0.0875905	0.107123
YDL105W	NSE4				0.127536		0.149618	0.0997454	0.120492
YDL106C	PHO2	0.960661	42	0.0158543	0.0716456	0.021747	0.0840507	0.0560338	0.0940808
YDL107W	MSS2	0.640441			0.138624		0.162626	0.108417	0.11438
YDL108W	KIN28	1.37695	27	0.0353492	0.174189	0.0437954	0.204349	0.136232	0.136369
YDL109C		0.256176	18	0.00986489		0.0114363
YDL110C	TMA17	4.355	45	0.0670812	0.248971	0.093795	0.292079	0.194719	0.0880132
YDL111C	RRP42		6		0.1107		0.129867	0.086578	0.0690027
YDL112W	TRM3		17		0.128094		0.150273	0.100182	0.431783
YDL113C	ATG20	1.37695	26	0.0367088	0.0668873	0.045155	0.0784685	0.0523124	0.100544
YDL114W		0.192132	32	0.00416175		0.0053403
YDL114W-A
YDL115C	IWR1	1.34493	32	0.0291322		0.0373821
YDL116W	NUP84	1.15279	17	0.0470033	0.0886735	0.0540746	0.104027	0.0693513	0.151186
YDL117W	CYK3	0.736507	19	0.0268688	0.139601	0.0313866	0.163772	0.109181	0.290095
YDL118W					0.0504411		0.0591748	0.0394499	0.0149909
YDL119C		1.15279	23	0.0347416	0.0736831	0.0418128	0.086441	0.0576273	0.05319
YDL120W	YFH1	3.93871	12	0.227509	0.0653061	0.251669	0.0766135	0.0510757	0.0267637
YDL121C		6.8207			0.0626099		0.0734506	0.048967	0.0219862
YDL122W	UBP1	3.71456	15	0.171649		0.194434
YDL123W	SNA4	1.76121			0.134326		0.157584	0.105056	0.0443337
YDL124W		26.5783			0.0983398		0.115367	0.0769113	0.0721428
YDL125C	HNT1	11.3358	31	0.253464	0.310261	0.322998	0.363981	0.242654	0.142438
YDL126C	CDC48	16.9076	38	0.308407	0.5918	0.41212	0.694267	0.462845	1.16035
YDL127W	PCL2	0.256176	13	0.0136591	0.092554	0.0152305	0.108579	0.0723862	0.0670296
YDL128W	VCX1	3.84265	10	0.266352	0.153989	0.289923	0.180651	0.120434	0.148736
YDL129W		0.384265			0.118074		0.138518	0.0923451	0.0808019
YDL130W	RPP1B	37.0815	31	0.829128	0.422053	1.05659	0.49513	0.330086	0.204984
YDL130W-A	STF1	6.5325
YDL131W	LYS21	2.81794	6	0.325541		0.342827
YDL132W	CDC53	2.40165	58	0.0287017	0.112657	0.0434336	0.132163	0.0881086	0.215602
YDL133C-A	RPL41B
YDL133W		1.79323	28	0.044392		0.0553918
YDL134C	PPH21	3.71456	16	0.160921	0.219595	0.183706	0.257617	0.171745	0.190465
YDL135C	RDI1	3.65051	32	0.0790732	0.111301	0.101466	0.130573	0.0870484	0.0529254
YDL136W	RPL35B	28.6918	23	0.864679	0.362065	1.04068	0.424755	0.28317	0.217191
YDL137W	ARF2	21.4548	21	0.708158	0.236293	0.839762	0.277207	0.184804	0.100718
YDL138W	RGT2	0.864595	17	0.0352525		0.0405559
YDL139C	SCM3	0.384265	17	0.0156678	0.0770539	0.0180249	0.0903955	0.0602636	0.0404369
YDL140C	RPO21	3.45838	33	0.0726414		0.0938553
YDL141W	BPL1	1.12077	39	0.0199195	0.0665283	0.0267943	0.0780473	0.0520316	0.107809
YDL142C	CRD1	1.05673	28	0.0261596		0.0326416
YDL143W	CCT4	18.3486	20	0.635915	0.204895	0.748467	0.240372	0.160248	0.254153
YDL144C		0.256176	12	0.0147973	0.169304	0.0163687	0.198618	0.132412	0.141681
YDL145C	COP1	3.45838	35	0.0684905	0.118213	0.0897044	0.138681	0.0924543	0.333298
YDL146W	LDB17	1.02471	37	0.0191965	0.0760784	0.0254821	0.089251	0.0595007	0.0877635
YDL147W	RPN5	8.87011	16	0.384268	0.360612	0.438678	0.423051	0.282034	0.377079
YDL148C	NOP14	0.800551	10	0.05549	0.111672	0.0604006	0.131008	0.0873386	0.212407
YDL149W	ATG9	1.08875	37	0.0203963		0.0270748
YDL150W	RPC53	0.736507			0.081378		0.0954682	0.0636455	0.0807025
YDL151C	BUD30
YDL152W		0.128088	23	0.00386017		0.00464587
YDL153C	SAS10	2.7539	10	0.190886	0.251902	0.207778	0.295517	0.197011	0.360925
YDL154W	MSH5	0.32022	28	0.00792714	0.0389055	0.00989139	0.0456418	0.0304279	0.0823073
YDL155W	CLB3	0.736507	12	0.0425423	0.0673889	0.0470601	0.079057	0.0527047	0.0676201
YDL156W		0.32022
YDL157C			32
YDL158C			31
YDL159C-B
YDL159W	STE7		11		0.0636446		0.0746644	0.0497762	0.0770038
YDL159W-A		0.0640441
YDL160C	DHH1	2.14548	41	0.0362715		0.049432
YDL160C-A		3.71456
YDL161W	ENT1	4.32298			0.20073		0.235486	0.15699	0.214135
YDL162C		0.0640441	57	0.000778807	0.0323564	0.00117166	0.0379588	0.0253059	0.00900889
YDL163W			18
YDL164C	CDC9	0.832573	22	0.0262316	0.089649	0.0313387	0.105171	0.0701142	0.158949
YDL165W	CDC36	6.98081			0.0807582		0.0947411	0.0631607	0.0363174
YDL166C	FAP7	1.72919	11	0.108962	0.171422	0.119569	0.201103	0.134069	0.0795029
YDL167C	NRP1	1.18482	5	0.16425	0.197043	0.171518	0.231161	0.154107	0.332717
YDL168W	SFA1	6.91676	53	0.0904591	0.145459	0.132887	0.170645	0.113763	0.131965
YDL169C	UGX2	0.608419
YDL170W	UGA3	0.672463	33	0.0141247		0.0182496
YDL171C	GLT1	3.65051	32	0.0790732	0.165108	0.101466	0.193696	0.129131	0.831213
YDL172C					0.11401		0.13375	0.0891666	0.0427108
YDL173W			14		0.154287		0.181001	0.120667	0.107032
YDL174C	DLD1	2.65783	26	0.0708564	0.142953	0.0871597	0.167704	0.111803	0.197109
YDL175C	AIR2	1.15279	40	0.0199764	0.151994	0.0270477	0.17831	0.118874	0.122915
YDL176W		0.32022			0.0579006		0.0679259	0.0452839	0.0962736
YDL177C			45		0.0724716		0.0850197	0.0566798	0.0290201
YDL178W	DLD2		6		0.126606		0.148527	0.0990182	0.157637
YDL179W	PCL9	0.384265	23	0.0115805	0.155821	0.0139376	0.1828	0.121867	0.111386
YDL180W		2.08143	33	0.0437194	0.0399327	0.056487	0.0468469	0.0312313	0.0513129
YDL181W	INH1	2.1775	26	0.0580511	0.104705	0.0714079	0.122834	0.0818895	0.0210456
YDL182W	LYS20	2.65783	7	0.263181	0.29364	0.279484	0.344482	0.229655	0.295336
YDL183C		0.448309			0.0351932		0.0412867	0.0275245	0.0264786
YDL184C	RPL41A		23
YDL185C-A		0.0640441
YDL185W	TFP1	16.5234	47	0.243684	0.224373	0.345039	0.263223	0.175482	0.564174
YDL186W		0.512353	52	0.00682954	0.149602	0.00997233	0.175504	0.117003	0.0974634
YDL187C		0.0640441			0.110489		0.129619	0.0864129	0.0284298
YDL188C	PPH22	1.34493	19	0.0490648	0.152107	0.0573147	0.178444	0.118962	0.134784
YDL189W	RBS1	1.82526	10	0.126517		0.137713
YDL190C	UFD2	2.27357			0.056241		0.0659789	0.0439859	0.126899
YDL191W	RPL35A	33.7833	26	0.900645	0.458931	1.10787	0.538393	0.358929	0.306166
YDL192W	ARF1	40.732	17	1.66078	0.294337	1.91063	0.345301	0.2302	0.125459
YDL193W	NUS1	2.56176	34	0.0522259	0.10133	0.0679398	0.118875	0.07925	0.0893147
YDL194W	SNF3	0.704485	40	0.0122078	0.02312	0.0165291	0.0271231	0.0180821	0.0479898
YDL195W	SEC31	1.69717	41	0.0286924	0.121092	0.0391029	0.142059	0.094706	0.361872
YDL196W		0.128088	35	0.00253668		0.00332238
YDL197C	ASF2	0.576397
YDL198C	GGC1	12.7768	9	0.984022		1.0624
YDL199C		0.192132	41	0.00324819	0.0177671	0.00442674	0.0208434	0.0138956	0.0286666
YDL200C	MGT1		41
YDL201W	TRM8		7		0.0809336		0.0949468	0.0632979	0.0544362
YDL202W	MRPL11	1.40897	10	0.0976624	0.088502	0.106305	0.103826	0.0692172	0.0518437
YDL203C		0.640441			0.0824084		0.096677	0.0644513	0.120588
YDL204W	RTN2	0.640441	68	0.00652823	0.0526032	0.0104567	0.0617112	0.0411408	0.0485873
YDL205C	HEM3	0.384265	21	0.0126834	0.138971	0.0150405	0.163033	0.108689	0.106841
YDL206W		1.53706			0.0196471		0.023049	0.015366	0.0351573
YDL207W	GLE1	0.448309	6	0.0517906	0.125591	0.0545406	0.147336	0.0982241	0.15873
YDL208W	NHP2	8.26169	6	0.954428	0.396414	1.00511	0.465051	0.310034	0.145716
YDL209C	CWC2	0.288198			0.218745		0.256619	0.17108	0.17433
YDL210W	UGA4	0.128088			0.0376564		0.0441765	0.029451	0.0505085
YDL211C		0.0960661			0.0742841		0.087146	0.0580974	0.0649529
YDL212W	SHR3	4.61117	14	0.228302		0.256587
YDL213C	NOP6	2.1775	11	0.137212	0.142185	0.150568	0.166804	0.111202	0.075284
YDL214C	PRR2	0.0640441
YDL215C	GDH2	0.928639	19	0.0338781	0.114837	0.0395744	0.13472	0.0898136	0.294409
YDL216C	RRI1	0.32022			0.0913443		0.10716	0.0714401	0.0944438
YDL217C	TIM22	0.512353	12	0.0295947	0.089221	0.0327375	0.104669	0.0697795	0.0434726
YDL218W		0.256176	36	0.00493244	0.0297587	0.00650384	0.0349113	0.0232742	0.0221803
YDL219W	DTD1	3.17018	33	0.066588	0.0537699	0.086034	0.0630799	0.0420533	0.0219939
YDL220C	CDC13		44		0.0683301		0.0801612	0.0534408	0.148245
YDL221W					0.123824		0.145264	0.0968425	0.0533602
YDL222C	FMP45	0.0960661	86	0.000774279	0.0247681	0.00136355	0.0290566	0.019371	0.0179957
YDL223C	HBT1	0.192132			0.0866826		0.101691	0.0677942	0.212874
YDL224C	WHI4	0.32022	17	0.0130565	0.109308	0.0150207	0.128234	0.0854894	0.166619
YDL225W	SHS1	4.03478	5	0.559339	0.09694	0.584089	0.113725	0.0758164	0.125476
YDL226C	GCS1	1.21684	14	0.0602463	0.242695	0.0677104	0.284716	0.189811	0.20082
YDL227C	HO	0.0640441
YDL228C			33
YDL229W	SSB1				0.189922		0.222806	0.148537	0.273457
YDL230W	PTP1	1.76121	18	0.0678211	0.153207	0.0786244	0.179734	0.119822	0.120661
YDL231C	BRE4	1.34493	23	0.0405318	0.102083	0.0487816	0.119758	0.0798388	0.269616
YDL232W	OST4	11.2718	21	0.372047		0.441189
YDL233W		0.448309	25	0.0124298	0.0496808	0.0151797	0.0582828	0.0388552	0.0534648
YDL234C	GYP7	2.91401	46	0.0439095		0.0617841
YDL235C	YPD1	5.15555	26	0.137444	0.102227	0.169069	0.119927	0.0799516	0.0402156
YDL236W	PHO13	10.9515	16	0.474439	0.136901	0.541617	0.160605	0.10707	0.100432
YDL237W		3.93871	23	0.1187	0.108684	0.142861	0.127502	0.0850012	0.0996214
YDL238C	GUD1	0.672463			0.0731073		0.0857656	0.057177	0.0839931
YDL239C	ADY3	0.544375	32	0.0117916	0.0338508	0.0151308	0.0397119	0.0264746	0.0627978
YDL240C-A		0.0640441
YDL240W	LRG1	0.480331
YDL241W		2.78592			0.207065		0.242918	0.161945	0.0600817
YDL242W		0.0640441	21	0.0021139	0.0461384	0.00250675	0.0541271	0.0360847	0.0127379
YDL243C	AAD4				0.117424		0.137755	0.0918367	0.0908265
YDL244W	THI13		25		0.0428244		0.0502393	0.0334929	0.0342297
YDL245C	HXT15				0.016387		0.0192243	0.0128162	0.021826
YDL246C	SOR2				0.0529016		0.0620613	0.0413742	0.0443945
YDL247W	MPH2		33		0.0303792		0.0356392	0.0237595	0.0434561
YDL247W-A
YDL248W	COS7		21
YDR001C	NTH1	2.49772
YDR002W	YRB1	27.571	32	0.597211	0.424524	0.766333	0.498028	0.332019	0.200871
YDR003W	RCR2		21		0.100468		0.117863	0.0785755	0.0496597
YDR003W-A		1.47301
YDR004W	RAD57	2.04941			0.0820339		0.0962377	0.0641585	0.088667
YDR005C	MAF1	1.66515			0.135884		0.159412	0.106275	0.13465
YDR006C	SOK1	3.13816	34	0.0639767	0.141306	0.0832263	0.165772	0.110515	0.298942
YDR007W	TRP1		21		0.0617176		0.0724038	0.0482692	0.0325334
YDR008C					0.10654		0.124987	0.0833245	0.0291636
YDR009W	GAL3				0.0377835		0.0443255	0.0295503	0.0461576
YDR010C			96		0.0341054		0.0400106	0.0266737	0.00885568
YDR011W	SNQ2	6.91676	32	0.149823		0.192251
YDR012W	RPL4B	37.0815	8	3.21287		3.44033
YDR013W	PSF1	3.07412	22	0.0968552		0.115712
YDR014W	RAD61	0.288198	23	0.00868539		0.0104532
YDR014W-A	HED1
YDR015C			20		0.0182824		0.0214479	0.0142986	0.00341737
YDR016C	DAD1	2.65783	50	0.0368453		0.0531486
YDR017C	KCS1	2.52974	22	0.0797038	0.193966	0.0952213	0.22755	0.1517	0.478158
YDR018C		0.512353	36	0.00986489	0.0675814	0.0130077	0.0792828	0.0528552	0.0628977
YDR019C	GCV1	6.69261			0.12097		0.141915	0.0946103	0.113722
YDR020C		0.544375			0.0972316		0.114067	0.0760446	0.0530791
YDR021W	FAL1		33		0.0961152		0.112757	0.0751714	0.0901305
YDR022C	CIS1		29		0.0546916		0.0641612	0.0427741	0.0252367
YDR023W	SES1	24.3368	33	0.51118	0.228953	0.660463	0.268595	0.179064	0.24854
YDR024W	FYV1
YDR025W	RPS11A	82.841	27	2.1267	0.279387	2.63486	0.327761	0.218508	0.176773
YDR026C		1.15279			0.151721		0.17799	0.11866	0.203146
YDR027C	VPS54	0.704485	36	0.0135642	0.0582631	0.0178856	0.0683511	0.0455674	0.121619
YDR028C	REG1	2.27357	28	0.0562827		0.0702288
YDR029W		0.192132	51	0.00261129		0.00378984
YDR030C	RAD28	0.704485	52	0.00939061		0.013712
YDR031W		3.2022	19	0.116821		0.136463
YDR032C	PST2	15.2425	119	0.088784	0.0669512	0.182282	0.0785435	0.0523623	0.0312079
YDR033W	MRH1	32.5664	32	0.705416	0.449892	0.90518	0.527788	0.351859	0.338488
YDR034C	LYS14	1.82526	23	0.0550075	0.0953808	0.0662037	0.111896	0.074597	0.176944
YDR034C-A
YDR034W-B		4.80331
YDR035W	ARO3	4.83533	19	0.1764	0.194313	0.20606	0.227957	0.151972	0.168992
YDR036C	EHD3	0.864595	26	0.0230497		0.0283532
YDR037W	KRS1	15.7548	22	0.496383	0.439906	0.593024	0.516074	0.344049	0.610688
YDR038C	ENA5	0.416287	19	0.0151867		0.0177403
YDR039C	ENA2		27		0.076808		0.090107	0.0600713	0.196734
YDR040C	ENA1		17
YDR041W	RSM10	2.91401	17	0.118814	0.0973202	0.136688	0.114171	0.0761138	0.0465055
YDR042C		0.0640441	70	0.000634171		0.00102702
YDR043C	NRG1	0.928639			0.125606		0.147354	0.0982358	0.0682739
YDR044W	HEM13	7.01283	11	0.441902	0.256687	0.484919	0.301131	0.200754	0.197943
YDR045C	RPC11	5.86003	10	0.406187	0.179178	0.442132	0.210202	0.140134	0.0465246
YDR046C	BAP3	12.6167	4	2.18631	0.26764	2.2637	0.31398	0.20932	0.379707
YDR047W	HEM12	4.80331	10	0.33294	0.356657	0.362404	0.41841	0.27894	0.303487
YDR048C		0.448309	18	0.0172635		0.0200135
YDR049W		0.896617	10	0.0621488	0.0871471	0.0676487	0.102236	0.0681574	0.129363
YDR050C	TPI1	204.237	32	4.42394	0.735084	5.67674	0.86236	0.574907	0.428881
YDR051C		0.928639	16	0.0402302	0.204037	0.0459266	0.239365	0.159577	0.160215
YDR052C	DBF4	0.800551
YDR053W			21		0.0662893		0.0777669	0.0518446	0.0204786
YDR054C	CDC34	1.8893	15	0.0873042	0.188135	0.0988933	0.22071	0.14714	0.130513
YDR055W	PST1	5.73195	20	0.198654	0.129935	0.233814	0.152433	0.101622	0.135564
YDR056C		3.17018	15	0.146494	0.11879	0.16594	0.139358	0.0929053	0.0573226
YDR057W	YOS9	1.08875			0.0631063		0.0740328	0.0493552	0.0803503
YDR058C	TGL2	0.416287	17	0.0169734	0.0223105	0.0195269	0.0261734	0.0174489	0.0171
YDR059C	UBC5	2.30559	20	0.0799056	0.0454607	0.0940482	0.053332	0.0355547	0.0190573
YDR060W	MAK21	4.70724
YDR061W		2.1775	11	0.137212	0.180694	0.150568	0.211981	0.14132	0.228798
YDR062W	LCB2	3.84265	17	0.156678	0.144215	0.180249	0.169185	0.11279	0.190051
YDR063W		2.68985	43	0.0433596	0.118215	0.0598593	0.138683	0.0924556	0.0415126
YDR064W	RPS13	76.4686	31	1.70981	1.81105	2.17887	2.12463	1.41642	1.40792
YDR065W		0.192132			0.162805		0.190994	0.127329	0.13968
YDR066C		1.21684	27	0.0312388		0.0387029
YDR067C		1.21684	26	0.0324403	0.0732431	0.0399044	0.0859249	0.0572832	0.0386089
YDR068W	DOS2	1.66515	10	0.115419	0.12925	0.125633	0.151629	0.101086	0.0942122
YDR069C	DOA4	0.384265			0.0576019		0.0675754	0.0450503	0.12524
YDR070C		1.24886
YDR071C	PAA1	12.8088	14	0.634171	0.136953	0.712741	0.160666	0.107111	0.0615888
YDR072C	IPT1	3.52243	29	0.0841917	0.211927	0.105798	0.248621	0.165747	0.262378
YDR073W	SNF11	2.43368			0.271768		0.318823	0.212549	0.108187
YDR074W	TPS2	3.17018			0.115393		0.135373	0.0902486	0.242769
YDR075W	PPH3	0.768529	17	0.0313355	0.0558731	0.0360497	0.0655473	0.0436982	0.0404646
YDR076W	RAD55	0.128088			0.0668052		0.0783722	0.0522481	0.0637427
YDR077W	SED1	84.7303	89	0.659894	0.578664	1.17963	0.678857	0.452571	0.459812
YDR078C	SHU2	0.832573	32	0.0180342	0.070482	0.0231413	0.0826857	0.0551238	0.0369881
YDR079C-A	TFB5	2.97805
YDR079W	PET100	2.20952	28	0.0546973	0.111689	0.0682506	0.131028	0.087352	0.0292629
YDR080W	VPS41	1.66515	26	0.044392		0.0546061
YDR081C	PDC2	1.02471	21	0.0338225	0.0899491	0.0401081	0.105523	0.0703489	0.195359
YDR082W	STN1	0.608419	25	0.016869	0.0547364	0.020601	0.0642137	0.0428091	0.0635288
YDR083W	RRP8	2.30559			0.163435		0.191733	0.127822	0.150574
YDR084C	TVP23	2.36963	17	0.0966178	0.0391665	0.111153	0.045948	0.030632	0.0183486
YDR085C	AFR1	1.66515	42	0.0274808	0.046039	0.0376948	0.0540104	0.0360069	0.0670449
YDR086C	SSS1	48.5454	12	2.80409	0.15871	3.10187	0.18619	0.124127	0.0300387
YDR087C	RRP1	1.79323	11	0.112998	0.179154	0.123998	0.210174	0.140116	0.117137
YDR088C	SLU7	1.37695			0.1563		0.183363	0.122242	0.140334
YDR089W		1.15279			0.0490819		0.0575802	0.0383868	0.100151
YDR090C		1.3129	16	0.0568772	0.0773517	0.0649306	0.0907448	0.0604965	0.0563828
YDR091C	RLI1	2.1775	10	0.150933	0.151076	0.16429	0.177234	0.118156	0.215753
YDR092W	UBC13	5.6679	19	0.206773	0.238141	0.24154	0.279374	0.186249	0.135776
YDR093W	DNF2		23		0.0664936		0.0780067	0.0520045	0.251598
YDR094W			14		0.17097		0.200572	0.133715	0.0447945
YDR095C			44
YDR096W	GIS1	0.800551	17	0.0326412	0.0558874	0.0375518	0.065564	0.0437093	0.117316
YDR097C	MSH6	1.18482			0.0772125		0.0905815	0.0603876	0.225125
YDR098C	GRX3	7.65327	15	0.353656	0.0704441	0.400602	0.0826411	0.0550941	0.0472156
YDR099W	BMH2	11.2718	20	0.390649	0.098974	0.459791	0.116111	0.0774073	0.0635514
YDR100W	TVP15	4.57915	10	0.317403	0.0644832	0.345491	0.0756482	0.0504321	0.0217363
YDR101C	ARX1	2.52974	10	0.175348	0.154481	0.190866	0.181228	0.120819	0.215179
YDR102C		0.0640441	31	0.001432		0.00182485
YDR103W	STE5		14
YDR104C	SPO71		19		0.043962		0.0515738	0.0343825	0.128488
YDR105C	TMS1	1.37695	12	0.0795356	0.0617032	0.0879819	0.0723868	0.0482579	0.0685744
YDR106W	ARP10	0.0640441	21	0.0021139	0.0446032	0.00250675	0.052326	0.034884	0.029791
YDR107C		0.224154			0.0357554		0.0419463	0.0279642	0.0564318
YDR108W	GSG1	0.32022	24	0.00924833	0.0511979	0.0112126	0.0600625	0.0400417	0.0839274
YDR109C		0.256176
YDR110W	FOB1	0.192132	19	0.00700926	0.144427	0.00818781	0.169433	0.112956	0.192024
YDR111C		1.12077			0.0741511		0.08699	0.0579933	0.0883238
YDR112W					0.066966		0.0785608	0.0523739	0.0161312
YDR113C	PDS1	0.608419			0.118773		0.139338	0.0928919	0.104132
YDR114C		0.192132	20	0.0066588		0.00783735
YDR115W		2.62581	20	0.0910036	0.150587	0.10711	0.17666	0.117773	0.0373342
YDR116C	MRPL1	2.27357	13	0.121224	0.115544	0.13517	0.13555	0.090367	0.0774445
YDR117C	TMA64	1.02471	17	0.0417807	0.0537245	0.0480663	0.0630267	0.0420178	0.0713042
YDR118W	APC4		31		0.0681018		0.0798933	0.0532622	0.104287
YDR118W-A
YDR119W		2.24154	11	0.141247	0.125732	0.154997	0.147502	0.0983348	0.22676
YDR119W-A		0.704485
YDR120C	TRM1	1.72919	8	0.149823	0.107667	0.16043	0.12631	0.0842063	0.144161
YDR121W	DPB4	1.34493	8	0.116529	0.118819	0.124779	0.139392	0.0929281	0.0548276
YDR122W	KIN1	1.6011	21	0.0528476	0.079011	0.0626688	0.0926914	0.0617943	0.197371
YDR123C	INO2	0.288198
YDR124W		0.416287	25	0.0115419	0.0367749	0.0140954	0.0431423	0.0287616	0.0280138
YDR125C	ECM18	0.448309			0.0389112		0.0456485	0.0304324	0.0414184
YDR126W	SWF1	0.224154	26	0.00597584	0.147393	0.00735082	0.172913	0.115276	0.116428
YDR127W	ARO1	2.62581	37	0.0491911	0.107018	0.0652979	0.125548	0.0836985	0.398907
YDR128W		0.960661			0.105151		0.123357	0.082238	0.283392
YDR129C	SAC6	14.9543	62	0.167186	0.18688	0.258916	0.219238	0.146158	0.298017
YDR130C	FIN1	0.736507	17	0.0300299	0.0885653	0.0345476	0.1039	0.0692666	0.0606083
YDR131C		0.800551	18	0.0308278	0.0226073	0.0357384	0.0265216	0.0176811	0.0295274
YDR132C		0.640441	32	0.0138725	0.0943294	0.017801	0.110662	0.0737747	0.109703
YDR133C		26.5463			0.356963		0.41877	0.27918	0.0935253
YDR135C	YCF1	5.79599	34	0.118161		0.153714
YDR136C	VPS61	0.0640441	40	0.0011098		0.00150265
YDR137W	RGP1	3.23423	22	0.1019	0.0771869	0.121739	0.0905514	0.0603676	0.120192
YDR138W	HPR1	0.928639
YDR139C	RUB1	3.7786	37	0.0707872		0.0939653
YDR140W	MTQ2		18		0.0914786		0.107318	0.0715451	0.0475775
YDR141C	DOP1		29
YDR142C	PEX7	0.576397	26	0.0153665	0.134796	0.0189021	0.158135	0.105424	0.118812
YDR143C	SAN1	0.288198	15	0.0133176	0.168251	0.0150854	0.197383	0.131589	0.241071
YDR144C	MKC7	0.640441			0.0848547		0.0995469	0.0663646	0.118793
YDR145W	TAF12	1.50504	11	0.0948374	0.271424	0.104069	0.318419	0.21228	0.343681
YDR146C	SWI5	0.640441	8	0.05549	0.0735686	0.0594185	0.0863067	0.0575378	0.122498
YDR147W	EKI1	1.15279
YDR148C	KGD2	4.45106	30	0.102841	0.0794905	0.130144	0.0932539	0.0621693	0.0864774
YDR149C			22		0.0590365		0.0692584	0.0461722	0.0326438
YDR150W	NUM1	1.69717			0.114039		0.133784	0.0891893	0.735455
YDR151C	CTH1	6.46845	14	0.320256	0.199402	0.359934	0.233927	0.155951	0.152364
YDR152W	GIR2	2.20952			0.263714		0.309375	0.20625	0.164381
YDR153C	ENT5	0.960661			0.279082		0.327404	0.218269	0.269563
YDR154C		313.496	30	7.24329	0.382687	9.16629	0.448947	0.299298	0.104754
YDR155C	CPR1		34		0.188828		0.221523	0.147682	0.0720688
YDR156W	RPA14		6		0.430277		0.504777	0.336518	0.138982
YDR157W					0.165567		0.194234	0.129489	0.0519252
YDR158W	HOM2	15.2745			0.290476		0.340771	0.22718	0.249217
YDR159W	SAC3	1.37695
YDR160W	SSY1	0.480331			0.0485099		0.0569092	0.0379395	0.0970492
YDR161W		2.84996			0.227372		0.26674	0.177827	0.206813
YDR162C	NBP2	2.04941			0.0694891		0.0815208	0.0543472	0.0385865
YDR163W	CWC15		21		0.103751		0.121715	0.081143	0.0427624
YDR164C	SEC1		28		0.057864		0.0678829	0.0452553	0.098385
YDR165W	TRM82	2.56176
YDR166C	SEC5	0.448309	42	0.00739866	0.0659795	0.0101486	0.0774036	0.0516024	0.150421
YDR167W	TAF10	1.92132	9	0.147973	0.134492	0.159759	0.157779	0.105186	0.0652153
YDR168W	CDC37	4.41904	64	0.0478601	0.152561	0.0749667	0.178976	0.119318	0.181363
YDR169C	STB3	0.736507	22	0.0232049	0.140338	0.0277227	0.164637	0.109758	0.169137
YDR169C-A		0.0640441
YDR170C	SEC7	4.355	29	0.104092	0.111273	0.130805	0.13054	0.0870265	0.524683
YDR171W	HSP42	17.0678
YDR172W	SUP35	3.90669	12	0.225659	0.375613	0.249623	0.440649	0.293766	0.604276
YDR173C	ARG82	0.576397	30	0.0133176	0.193762	0.0168532	0.227311	0.151541	0.161694
YDR174W	HMO1	15.2425	16	0.660331	0.338468	0.753829	0.397072	0.264715	0.195889
YDR175C	RSM24	2.33761	8	0.202538	0.147784	0.216877	0.173373	0.115582	0.110843
YDR176W	NGG1	1.21684	17	0.0496146	0.165913	0.0570787	0.19464	0.12976	0.273534
YDR177W	UBC1	13.9936	19	0.510508	0.0930292	0.596345	0.109137	0.0727579	0.0470743
YDR178W	SDH4	7.8454	33	0.164788	0.035369	0.212912	0.041493	0.027662	0.0150758
YDR179C	CSN9	1.15279	28	0.0285377	0.0325329	0.035609	0.0381658	0.0254439	0.0124166
YDR179W-A		0.704485	14	0.0348794		0.0392008
YDR180W	SCC2	2.01739	22	0.0635612		0.075936
YDR181C	SAS4	1.08875	12	0.0628886	0.0813618	0.0695671	0.0954493	0.0636328	0.0919495
YDR182W	CDC1		19		0.134562		0.15786	0.10524	0.155229
YDR182W-A
YDR183C-A		1.21684
YDR183W	PLP1	1.37695	21	0.0454489	0.0800506	0.0538952	0.093911	0.0626073	0.0433243
YDR184C	ATC1
YDR185C		1.21684	28	0.0301231	0.163684	0.0375873	0.192025	0.128016	0.0690008
YDR186C		1.02471
YDR187C		0.0640441	11	0.00403563	0.551311	0.00442848	0.646768	0.431179	0.223351
YDR188W	CCT6	5.31566	8	0.460567	0.374423	0.493173	0.439253	0.292835	0.48025
YDR189W	SLY1	1.92132	13	0.102443	0.100724	0.114229	0.118164	0.0787758	0.157552
YDR190C	RVB1	9.54257	12	0.5512	0.255948	0.609735	0.300264	0.200176	0.278445
YDR191W	HST4	0.384265			0.0657471		0.077131	0.0514206	0.0571797
YDR192C	NUP42	0.608419	21	0.0200821	0.118324	0.0238142	0.138811	0.0925406	0.119562
YDR193W					0.0721408		0.0846316	0.0564211	0.0224556
YDR194C	MSS116	4.13084	9	0.318143	0.168529	0.343481	0.197709	0.131806	0.262821
YDR194W-A		0.0640441
YDR195W	REF2		18
YDR196C					0.136594		0.160244	0.106829	0.0774513
YDR197W	CBS2	0.864595			0.0848243		0.0995112	0.0663408	0.0775524
YDR198C		0.992683			0.0622384		0.0730147	0.0486765	0.0700454
YDR199W
YDR200C	VPS64				0.0582658		0.0683543	0.0455695	0.0826631
YDR201W	SPC19				0.061259		0.0718657	0.0479105	0.0238115
YDR202C	RAV2		37		0.15775		0.185064	0.123376	0.130162
YDR203W			31		0.0753034		0.0883418	0.0588945	0.0186696
YDR204W	COQ4	1.56908	70	0.0155372	0.177803	0.025162	0.208588	0.139059	0.140032
YDR205W	MSC2	0.32022	17	0.0130565		0.0150207
YDR206W	EBS1	0.704485	15	0.0325541	0.0811675	0.0368755	0.0952213	0.0634809	0.168478
YDR207C	UME6	0.992683	17	0.040475	0.0764079	0.0465642	0.0896376	0.0597584	0.149994
YDR208W	MSS4	1.08875			0.164033		0.192434	0.128289	0.300069
YDR209C			25		0.228239		0.267757	0.178505	0.0737225
YDR210W			30		0.394599		0.462922	0.308614	0.0700555
YDR211W	GCD6	1.24886	11	0.0786949	0.172289	0.0863554	0.20212	0.134747	0.288089
YDR212W	TCP1	3.93871			0.130022		0.152534	0.101689	0.170737
YDR213W	UPC2	0.896617
YDR214W	AHA1	3.26625	116	0.0195172	0.439916	0.0395525	0.516085	0.344057	0.361948
YDR215C		0.0640441	79	0.000561924		0.000954773
YDR216W	ADR1	0.672463	47	0.00991736	0.0291605	0.0140423	0.0342095	0.0228063	0.090564
YDR217C	RAD9	1.82526	15	0.0843448	0.0610912	0.095541	0.0716688	0.0477792	0.187724
YDR218C	SPR28	0.128088			0.0145286		0.0170441	0.0113628	0.0144421
YDR219C	MFB1	1.05673
YDR220C		0.448309
YDR221W	GTB1	0.512353	16	0.022196	0.100921	0.0253388	0.118396	0.0789304	0.166385
YDR222W		1.34493	29	0.0321459	0.0517496	0.0403958	0.0607098	0.0404732	0.05047
YDR223W	CRF1	0.32022			0.0450779		0.052883	0.0352553	0.0494632
YDR224C	HTB1	34.808	7	3.44672	0.790929	3.66023	0.927875	0.618583	0.24434
YDR225W	HTA1	31.0934	6	3.59205	0.935969	3.78278	1.09803	0.732018	0.291343
YDR226W	ADK1	27.7311	27	0.711916	0.307877	0.88202	0.361184	0.240789	0.160847
YDR227W	SIR4	0.928639	18	0.0357602	0.0908634	0.0414565	0.106596	0.071064	0.289657
YDR228C	PCF11	0.704485	15	0.0325541		0.0368755
YDR229W	IVY1		10		0.155371		0.182273	0.121516	0.165383
YDR230W			32		0.0607646		0.0712857	0.0475238	0.0164908
YDR231C	COX20		12		0.049861		0.0584942	0.0389961	0.0240606
YDR232W	HEM1	1.40897	10	0.0976624	0.276592	0.106305	0.324483	0.216322	0.356066
YDR233C	RTN1	7.62125	10	0.528265	0.2426	0.575014	0.284605	0.189737	0.168296
YDR234W	LYS4	0.832573	12	0.0480913	0.115815	0.0531984	0.135868	0.0905786	0.188494
YDR235W	PRP42		33
YDR236C	FMN1		23		0.0568576		0.0667022	0.0444682	0.0291711
YDR237W	MRPL7	2.11346	19	0.0771019	0.0705316	0.0900659	0.0827439	0.0551626	0.0484327
YDR238C	SEC26	5.41173	38	0.0987138		0.13191
YDR239C		0.608419	20	0.0210862		0.0248183
YDR240C	SNU56	2.01739	30	0.0466116		0.0589863
YDR241W	BUD26	4.19489
YDR242W	AMD2		25		0.102752		0.120544	0.0803624	0.132518
YDR243C	PRP28				0.083254		0.0976691	0.0651127	0.114989
YDR244W	PEX5	0.0640441	37	0.00119978		0.00159263
YDR245W	MNN10	2.30559	14	0.114151		0.128293
YDR246W	TRS23	0.640441	19	0.0233642		0.0272927
YDR246W-A		0.128088
YDR247W	VHS1	0.768529	50	0.0106541		0.0153683
YDR248C		5.09151	31	0.113844	0.101705	0.145075	0.119315	0.0795431	0.0462146
YDR249C		0.256176			0.104052		0.122069	0.0813791	0.091226
YDR250C		0.0640441
YDR251W	PAM1	1.12077	10	0.077686	0.10792	0.0845608	0.126605	0.0844036	0.210334
YDR252W	BTT1	0.512353	38	0.00934568		0.0124885
YDR253C	MET32	2.68985	12	0.155372	0.0726743	0.171872	0.0852575	0.0568384	0.0326821
YDR254W	CHL4				0.0610928		0.0716707	0.0477805	0.0657459
YDR255C	RMD5		42		0.0596745		0.0700068	0.0466712	0.0590391
YDR256C	CTA1	0.0640441			0.0803014		0.0942052	0.0628035	0.0971569
YDR257C	SET7	1.12077	94	0.00826447	0.165246	0.0151393	0.193858	0.129239	0.19179
YDR258C	HSP78	13.8976
YDR259C	YAP6	0.512353
YDR260C	SWM1	0.448309	33	0.00941648	0.14868	0.0121664	0.174424	0.116283	0.0595366
YDR261C	EXG2	1.50504	22	0.0474187	0.111531	0.0566507	0.130842	0.087228	0.147241
YDR262W		1.28088	31	0.02864	0.0938641	0.036497	0.110116	0.0734108	0.0600501
YDR263C	DIN7	0.448309
YDR264C	AKR1	3.33029	16	0.144274	0.302456	0.164702	0.354825	0.23655	0.542645
YDR265W	PEX10	0.928639	26	0.0247571	0.158938	0.0304534	0.186458	0.124305	0.125921
YDR266C		1.44099	20	0.049941	0.10482	0.0587801	0.122969	0.0819794	0.157318
YDR267C	CIA1	1.82526	8	0.158146	0.169552	0.169343	0.198909	0.132606	0.131545
YDR268W	MSW1	0.608419	13	0.0324403	0.107279	0.0361724	0.125854	0.0839027	0.0955651
YDR269C			31
YDR270W	CCC2		15
YDR271C			23		0.131013		0.153698	0.102465	0.0380146
YDR272W	GLO2	3.90669	21	0.128948	0.108938	0.152912	0.1278	0.0852	0.0702048
YDR273W	DON1	0.352243	90	0.00271284	0.0749473	0.00487352	0.0879241	0.0586161	0.0643018
YDR274C		0.128088			0.446663		0.524001	0.349334	0.129603
YDR275W	BSC2	0.576397			0.30757		0.360824	0.24055	0.170069
YDR276C	PMP3	49.6982	13	2.64986		2.95471
YDR277C	MTH1	0.416287	41	0.00703775	0.190891	0.00959127	0.223943	0.149295	0.194233
YDR278C		0.0640441
YDR279W	RNH202	1.6011			0.126474		0.148372	0.0989148	0.104058
YDR280W	RRP45	1.72919			0.160613		0.188423	0.125615	0.115189
YDR281C	PHM6	0.832573			0.151733		0.178005	0.11867	0.0372624
YDR282C		0.32022	31	0.00716	0.0332352	0.00912424	0.0389898	0.0259932	0.0323355
YDR283C	GCN2	0.512353
YDR284C	DPP1	5.05948	26	0.134883	0.0810098	0.165918	0.0950363	0.0633575	0.0550577
YDR285W	ZIP1	0.384265
YDR286C		1.47301
YDR287W		0.32022			0.0319163		0.0374425	0.0249616	0.0219163
YDR288W	NSE3	2.24154	14	0.11098	0.133442	0.12473	0.156547	0.104365	0.0950763
YDR289C	RTT103	2.49772	10	0.173129	0.150741	0.18845	0.176841	0.117894	0.144892
YDR290W
YDR291W		0.704485	19	0.0257006		0.030022
YDR292C	SRP101	6.59654	11	0.41567	0.13027	0.456134	0.152825	0.101884	0.190013
YDR293C	SSD1	3.2022	21	0.105695	0.16052	0.125338	0.188313	0.125542	0.471034
YDR294C	DPL1	2.59379	29	0.0619957	0.242227	0.0779061	0.284167	0.189445	0.335128
YDR295C	HDA2	0.512353			0.078874		0.0925307	0.0616871	0.124855
YDR296W	MHR1	2.24154
YDR297W	SUR2	3.2022	8	0.27745	0.325107	0.297092	0.381398	0.254265	0.266724
YDR298C	ATP5	5.25162	13	0.280011		0.312225
YDR299W	BFR2	1.34493	7	0.133176	0.273869	0.141426	0.321288	0.214192	0.343564
YDR300C	PRO1	0.928639	12	0.0536403		0.0593366
YDR301W	CFT1	0.992683			0.0735809		0.0863211	0.0575474	0.23439
YDR302W	GPI11	0.768529	16	0.033294	0.0264502	0.0380082	0.0310299	0.0206866	0.0136325
YDR303C	RSC3	0.576397	15	0.0266352	0.0453102	0.0301708	0.0531554	0.0354369	0.0941559
YDR304C	CPR5	11.1757	34	0.227835	0.109434	0.296388	0.128382	0.0855881	0.0579432
YDR305C	HNT2	2.59379			0.0971539		0.113976	0.0759838	0.05638
YDR306C		0.800551			0.0526027		0.0617106	0.0411404	0.0590776
YDR307W		1.44099			0.0469026		0.0550236	0.0366824	0.0729246
YDR308C	SRB7	1.82526	15	0.0843448	0.0736021	0.095541	0.086346	0.057564	0.024292
YDR309C	GIC2	3.39434	10	0.235278	0.143691	0.256099	0.168571	0.11238	0.12935
YDR310C	SUM1	1.47301
YDR311W	TFB1	2.14548			0.128303		0.150519	0.100346	0.193467
YDR312W	SSF2	2.08143	10	0.144274	0.112962	0.157042	0.132521	0.0883471	0.12024
YDR313C	PIB1	0.768529	26	0.0204886	0.0975459	0.0252028	0.114436	0.0762904	0.0656097
YDR314C		0.384265			0.0730519		0.0857005	0.0571337	0.118724
YDR315C	IPK1	0.448309	31	0.010024	0.033958	0.0127739	0.0398377	0.0265585	0.0224419
YDR316W	OMS1	0.544375	20	0.0188666	0.142903	0.0222058	0.167646	0.111764	0.158147
YDR317W	HIM1	0.16011			0.0274917		0.0322518	0.0215012	0.0267475
YDR318W	MCM21				0.057176		0.0670758	0.0447172	0.0531687
YDR319C			44		0.103762		0.121727	0.0811516	0.0668689
YDR320C	SWA2	0.832573			0.0755525		0.0886341	0.0590894	0.118533
YDR320C-A	DAD4	5.28364			0.225732		0.264816	0.176544	0.0384866
YDR320W-B
YDR321W	ASP1	4.89937	21	0.161714	0.119028	0.191767	0.139638	0.0930917	0.10659
YDR322C-A	TIM11	2.33761
YDR322W	MRPL35	1.53706			0.14712		0.172593	0.115062	0.126913
YDR323C	PEP7	0.256176			0.0431668		0.050641	0.0337607	0.0522277
YDR324C	UTP4	2.65783			0.206397		0.242134	0.161423	0.376115
YDR325W	YCG1	0.256176			0.0862986		0.101241	0.0674939	0.209703
YDR326C	YSP2	0.0960661			0.158332		0.185746	0.123831	0.534455
YDR327W					0.0863622		0.101315	0.0675436	0.0220192
YDR328C	SKP1		29		0.167185		0.196132	0.130755	0.0763607
YDR329C	PEX3	1.92132			0.0526182		0.0617288	0.0411525	0.0545271
YDR330W	UBX5	1.66515			0.0699819		0.082099	0.0547327	0.0822085
YDR331W	GPI8	1.15279			0.0547873		0.0642734	0.0428489	0.0529185
YDR332W		1.37695			0.0546089		0.0640642	0.0427094	0.0883658
YDR333C		2.20952			0.0873982		0.102531	0.0683539	0.148396
YDR334W	SWR1	0.704485			0.180654		0.211933	0.141289	0.642017
YDR335W	MSN5	4.41904			0.165725		0.19442	0.129613	0.476199
YDR336W		0.960661			0.076695		0.0899744	0.0599829	0.0566239
YDR337W	MRPS28	1.40897	13	0.0751249	0.177292	0.0837676	0.207989	0.13866	0.119247
YDR338C		0.224154			0.0569587		0.0668208	0.0445472	0.09297
YDR339C	FCF1	3.2022			0.126223		0.148078	0.0987188	0.056171
YDR340W
YDR341C		5.86003	29	0.140064	0.262414	0.17601	0.30785	0.205233	0.37414
YDR342C	HXT7		59		0.0413302		0.0484863	0.0323242	0.0553391
YDR343C	HXT6		56
YDR344C		0.0640441	24	0.00184967	0.0696252	0.00224252	0.0816804	0.0544536	0.024123
YDR345C	HXT3	14.7301	25	0.408406	0.262975	0.498762	0.308508	0.205672	0.350259
YDR346C	SVF1	5.50779	8	0.477214	0.224496	0.510999	0.263367	0.175578	0.25371
YDR347W	MRP1	3.2022	14	0.158543	0.102664	0.178185	0.12044	0.0802936	0.0774833
YDR348C		2.59379			0.220474		0.258648	0.172432	0.258476
YDR349C	YPS7	4.25893			0.110053		0.129109	0.0860724	0.15407
YDR350C	TCM10	0.704485			0.0827897		0.0971243	0.0647495	0.118815
YDR351W	SBE2	1.21684			0.117749		0.138136	0.092091	0.238884
YDR352W		0.608419			0.200726		0.235481	0.156987	0.149609
YDR353W	TRR1	16.5554	15	0.765022	0.239159	0.866573	0.280568	0.187045	0.179376
YDR354C-A
YDR354W	TRP4	2.84996	9	0.219494	0.0869951	0.236975	0.102058	0.0680386	0.0777001
YDR355C
YDR356W	SPC110	0.480331	15	0.022196		0.0251424
YDR357C		3.93871
YDR358W	GGA1	0.512353	88	0.00403563	0.102408	0.00717843	0.12014	0.080093	0.133996
YDR359C	VID21	0.480331	12	0.027745	0.107047	0.0306914	0.125582	0.0837214	0.246811
YDR360W	OPI7				0.0645963		0.0757808	0.0505206	0.0195009
YDR361C	BCP1	1.76121	8	0.152597	0.118045	0.163401	0.138484	0.0923225	0.0785664
YDR362C	TFC6	1.02471			0.0787036		0.0923308	0.0615539	0.124216
YDR363W	ESC2	0.608419
YDR363W-A	SEM1	7.14092
YDR364C	CDC40	0.480331
YDR365C	ESF1	11.56	9	0.890306		0.961215
YDR366C			56		0.0190537		0.0223528	0.0149019	0.00593095
YDR367W		4.73926	23	0.142826	0.0354069	0.171897	0.0415374	0.0276916	0.0212118
YDR368W	YPR1	2.11346	44	0.033294		0.046258
YDR369C	XRS2	0.832573			0.0361332		0.0423895	0.0282597	0.0724578
YDR370C		2.33761
YDR371C-A
YDR371W	CTS2	3.4904	23	0.10519	0.0756391	0.1266	0.0887356	0.0591571	0.0908061
YDR372C	VPS74	7.17294			0.19183		0.225044	0.150029	0.15558
YDR373W	FRQ1	4.19489	22	0.132167	0.117671	0.157899	0.138045	0.0920298	0.052641
YDR374C		0.256176
YDR374W-A		1.82526
YDR375C	BCS1	1.37695			0.0712875		0.0836306	0.0557537	0.0763826
YDR376W	ARH1	0.864595
YDR377W	ATP17	4.83533	17	0.197153		0.226813
YDR378C	LSM6	8.74202			0.152081		0.178413	0.118942	0.0309249
YDR379C-A
YDR379W	RGA2		20
YDR380W	ARO10	0.384265
YDR381C-A		2.14548			0.0923006		0.108282	0.0721881	0.0388372
YDR381W	YRA1	6.88474
YDR382W	RPP2B	72.4339	24	2.09197	0.958259	2.53628	1.12418	0.749452	0.248818
YDR383C	NKP1	4.67522			0.0942893		0.110615	0.0737434	0.0528003
YDR384C	ATO3	1.79323	21	0.0591893	0.0637573	0.0701891	0.0747965	0.0498644	0.0412378
YDR385W	EFT2		34		0.255477		0.299711	0.199807	0.505113
YDR386W	MUS81	0.832573			0.0576182		0.0675945	0.045063	0.0855296
YDR387C		1.08875	28	0.0269523	0.058366	0.0336307	0.0684719	0.0456479	0.0760951
YDR388W	RVS167	5.98812	51	0.0813853	0.179379	0.118117	0.210438	0.140292	0.203142
YDR389W	SAC7	0.704485			0.131845		0.154673	0.103115	0.202519
YDR390C	UBA2	4.89937	10	0.339599	0.0774432	0.369652	0.0908521	0.0605681	0.115685
YDR391C		2.1775			0.144242		0.169217	0.112811	0.0787422
YDR392W	SPT3	1.34493			0.1901		0.223015	0.148677	0.15061
YDR393W	SHE9	1.18482	14	0.0586608		0.0659286
YDR394W	RPT3	6.94878	14	0.344038	0.200243	0.386662	0.234915	0.15661	0.2014
YDR395W	SXM1	2.81794	25	0.0781299	0.156707	0.0954153	0.18384	0.12256	0.347335
YDR396W					0.301217		0.353371	0.235581	0.11779
YDR397C	NCB2				0.588811		0.69076	0.460507	0.24499
YDR398W	UTP5	2.36963	8	0.205313	0.253663	0.219848	0.297584	0.198389	0.383089
YDR399W	HPT1	9.95886			0.362233		0.424952	0.283302	0.188396
YDR400W	URH1	1.12077			0.112946		0.132502	0.0883346	0.090278
YDR401W			95		0.0178068		0.0208899	0.0139266	0.00784069
YDR402C	DIT2
YDR403W	DIT1	0.192132	54	0.00246622		0.00364477
YDR404C	RPB7	3.74658	11	0.236085		0.259066
YDR405W	MRP20	1.69717			0.087901		0.103121	0.0687471	0.054379
YDR406W	PDR15		37		0.035196		0.04129	0.0275267	0.12632
YDR406W-A
YDR407C	TRS120		15		0.0395032		0.0463431	0.0308954	0.119534
YDR408C	ADE8	3.97073	12	0.229359	0.208899	0.253715	0.245069	0.163379	0.105216
YDR409W	SIZ1	0.512353	32	0.011098	0.0662114	0.0142408	0.0776756	0.0517837	0.140541
YDR410C	STE14	2.04941			0.0930975		0.109217	0.0728113	0.0523513
YDR411C	DFM1	1.47301	16	0.0638135	0.260418	0.072849	0.305508	0.203672	0.208764
YDR412W					0.146804		0.172223	0.114815	0.0811742
YDR413C			7		0.0734581		0.086177	0.0574514	0.0330345
YDR414C	ERD1	2.11346			0.0762949		0.089505	0.05967	0.0649209
YDR415C		0.704485	14	0.0348794	0.205208	0.0392008	0.240739	0.160493	0.180394
YDR416W	SYF1	1.6011			0.124342		0.145872	0.0972479	0.250802
YDR417C			26		0.444769		0.521779	0.347853	0.129053
YDR418W	RPL12B	45.055	23	1.35782	0.322973	1.63419	0.378894	0.252596	0.12554
YDR419W	RAD30	0.128088			0.0497121		0.0583196	0.0388797	0.0737937
YDR420W	HKR1	0.512353			0.121686		0.142755	0.09517	0.514679
YDR421W	ARO80	2.04941	26	0.0546363	0.0738028	0.0672075	0.0865814	0.0577209	0.16462
YDR422C	SIP1	1.15279	19	0.0420556	0.0943761	0.0491269	0.110717	0.0738113	0.180616
YDR423C	CAD1	1.56908	12	0.0906336	0.152557	0.100258	0.178972	0.119314	0.146637
YDR424C	DYN2	4.80331			0.173911		0.204023	0.136015	0.0617509
YDR425W	SNX41
YDR426C
YDR427W	RPN9		19		0.155626		0.182572	0.121714	0.143745
YDR428C					0.0714977		0.0838772	0.0559181	0.0438957
YDR429C	TIF35	18.829	8	1.63141	0.369239	1.7469	0.433171	0.288781	0.237955
YDR430C	CYM1	0.192132	31	0.004296		0.00547455
YDR431W
YDR432W	NPL3		28		0.27765		0.325724	0.217149	0.270134
YDR433W			34		0.571644		0.670621	0.447081	0.196716
YDR434W	GPI17	5.50779			0.0434839		0.0510129	0.0340086	0.0545498
YDR435C	PPM1	1.24886	21	0.0412211	0.104039	0.0488817	0.122052	0.0813683	0.0802292
YDR436W	PPZ2	0.416287			0.0851945		0.0999456	0.0666304	0.142056
YDR437W	GPI19	0.448309			0.138062		0.161967	0.107978	0.0455668
YDR438W		0.256176			0.116756		0.136971	0.0913142	0.101541
YDR439W	LRS4	0.512353			0.114641		0.134491	0.0896605	0.0935159
YDR440W	DOT1	0.768529	10	0.0532704	0.0577532	0.0579846	0.0677529	0.0451686	0.0789547
YDR441C	APT2	1.05673	8	0.0915585	0.267837	0.0980405	0.314212	0.209474	0.114164
YDR442W					0.119942		0.140709	0.0938063	0.0367721
YDR443C	SSN2		15
YDR444W					0.101712		0.119323	0.079549	0.16411
YDR445C			46
YDR446W	ECM11	2.24154
YDR447C	RPS17B	107.914	28	2.67145	0.376155	3.3334	0.441285	0.29419	0.212993
YDR448W	ADA2	0.448309	14	0.022196	0.175887	0.0249459	0.206341	0.137561	0.179379
YDR449C	UTP6	1.56908	5	0.217521		0.227146
YDR450W	RPS18A	80.3753	22	2.53236	0.243411	3.02539	0.285557	0.190371	0.166575
YDR451C	YHP1	0.704485	9	0.0542569	0.342625	0.0585782	0.401949	0.267966	0.284312
YDR452W	PPN1	4.41904	12	0.255254	0.0809923	0.282361	0.0950157	0.0633438	0.128208
YDR453C	TSA2	1.44099	37	0.0269951		0.0358342
YDR454C	GUK1	12.3605
YDR455C		0.0640441	23	0.00193009	0.124724	0.00232294	0.146319	0.0975462	0.0300442
YDR456W	NHX1	1.08875	12	0.0628886		0.0695671
YDR457W	TOM1	2.59379			0.0693892		0.0814036	0.054269	0.532162
YDR458C		1.15279	17	0.0470033	0.101173	0.0540746	0.11869	0.0791269	0.157542
YDR459C	PFA5	0.800551	26	0.0213423	0.116773	0.0262529	0.136992	0.0913281	0.102653
YDR460W	TFB3	0.544375	14	0.0269523	0.140629	0.0302915	0.164978	0.109986	0.106136
YDR461C-A		1.69717
YDR461W	MFA1	27.2187
YDR462W	MRPL28	2.24154	23	0.067553	0.157765	0.0813027	0.185082	0.123388	0.0546608
YDR463W	STP1	2.84996	7	0.282206	0.108515	0.299688	0.127304	0.0848693	0.132311
YDR464C-A
YDR464W	SPP41	0.544375
YDR465C	RMT2	7.30103	12	0.421724		0.466509
YDR466W	PKH3
YDR467C			29
YDR468C	TLG1	3.81062	19	0.139017	0.159737	0.162392	0.187395	0.12493	0.0842028
YDR469W	SDC1	1.12077			0.0935195		0.109712	0.0731413	0.0385455
YDR470C	UGO1	0.256176			0.0453625		0.0532168	0.0354779	0.0535006
YDR471W	RPL27B	59.4649	16	2.57612	0.536276	2.94088	0.629129	0.419419	0.333019
YDR472W	TRS31	0.960661	34	0.0195847		0.0254774
YDR473C	PRP3	1.40897			0.0961817		0.112835	0.0752234	0.10599
YDR475C		1.37695			0.211463		0.248077	0.165384	0.434961
YDR476C		2.08143	14	0.103053	0.206492	0.11582	0.242246	0.161497	0.108849
YDR477W	SNF1	2.11346	18	0.0813853	0.11596	0.0943493	0.136038	0.0906922	0.172406
YDR478W	SNM1		17		0.0826961		0.0970146	0.0646764	0.0385471
YDR479C	PEX29		44		0.103028		0.120867	0.0805779	0.134082
YDR480W	DIG2	1.12077	15	0.0517906	0.069091	0.0586655	0.0810538	0.0540359	0.0524688
YDR481C	PHO8	4.0668	20	0.140945	0.299764	0.16589	0.351667	0.234444	0.398555
YDR482C	CWC21	1.82526	13	0.0973209	0.223892	0.108517	0.262658	0.175105	0.0712678
YDR483W	KRE2	3.93871	31	0.088068	0.102475	0.112228	0.120218	0.080145	0.106433
YDR484W	VPS52	0.544375			0.0589138		0.0691144	0.0460763	0.0886968
YDR485C	VPS72	0.384265			0.129762		0.15223	0.101486	0.242248
YDR486C	VPS60	1.47301	18	0.0567231	0.10354	0.0657586	0.121468	0.0809786	0.0557943
YDR487C	RIB3	8.77404	17	0.357747	0.255057	0.411568	0.299219	0.199479	0.124874
YDR488C	PAC11	0.544375	12	0.0314443	0.16182	0.0347835	0.189838	0.126559	0.202621
YDR489W	SLD5		12		0.0609988		0.0715604	0.047707	0.0421729
YDR490C	PKH1				0.0553685		0.0649553	0.0433035	0.0995982
YDR491C		0.0640441	13	0.00341477	0.0900984	0.00380762	0.105699	0.0704657	0.0345987
YDR492W	IZH1	0.960661			0.107471		0.126079	0.0840526	0.07985
YDR493W		1.76121	17	0.0718106	0.158722	0.0826139	0.186204	0.124136	0.0460545
YDR494W	RSM28		7		0.108463		0.127242	0.0848283	0.0920387
YDR495C	VPS3
YDR496C	PUF6	0.992683	6	0.114679	0.196057	0.120768	0.230004	0.153336	0.302072
YDR497C	ITR1	6.85272			0.136188		0.159768	0.106512	0.186822
YDR498C	SEC20	1.21684	10	0.0843448	0.117048	0.0918089	0.137315	0.0915431	0.105366
YDR499W	LCD1	0.960661			0.0486573		0.057082	0.0380547	0.0853567
YDR500C	RPL37B	38.1062	22	1.2006	0.591117	1.43435	0.693466	0.462311	0.302813
YDR501W	PLM2	0.192132			0.0450514		0.0528519	0.0352346	0.0551421
YDR502C	SAM2	10.7594	16	0.466116	0.09135	0.532115	0.107167	0.0714446	0.082447
YDR503C	LPP1	0.32022
YDR504C	SPG3	1.40897	51	0.0191495		0.0277922
YDR505C	PSP1				0.0554099		0.0650038	0.0433359	0.109423
YDR506C		0.352243			0.0771775		0.0905404	0.0603603	0.110218
YDR507C	GIN4	0.832573			0.147987		0.17361	0.11574	0.396757
YDR508C	GNP1	2.97805			0.160302		0.188058	0.125372	0.249615
YDR509W		0.192132			0.317899		0.372942	0.248628	0.086274
YDR510C-A
YDR510W	SMT3		19
YDR511W	ACN9		33		0.146138		0.171441	0.114294	0.0458318
YDR512C	EMI1		20		0.0681505		0.0799504	0.0533003	0.0300081
YDR513W	GRX2		71
YDR514C			22		0.104173		0.12221	0.0814735	0.118218
YDR515W	SLF1	0.704485			0.0502		0.0588919	0.0392613	0.0527279
YDR516C	EMI2	5.50779			0.133246		0.156316	0.104211	0.156525
YDR517W	GRH1	4.16287	25	0.115419	0.172411	0.140954	0.202264	0.134842	0.150754
YDR518W	EUG1	3.74658			0.0365606		0.0428909	0.028594	0.0444064
YDR519W	FPR2	4.51511	23	0.136071	0.102785	0.163767	0.120582	0.080388	0.0327179
YDR520C		1.12077			0.0590281		0.0692485	0.0461657	0.107012
YDR521W					0.0616272		0.0722977	0.0481984	0.0161465
YDR522C	SPS2	0.032022	24	0.000924833	0.114974	0.00112126	0.134881	0.0899207	0.1356
YDR523C	SPS1	0.0640441			0.0189916		0.0222799	0.0148533	0.021864
YDR524C	AGE1	0.672463			0.0597755		0.0701254	0.0467503	0.0676944
YDR524C-A
YDR524C-B		102.342
YDR524W-C		149.927
YDR525W	API2	0.0640441	66	0.000672606		0.00106546
YDR525W-A	SNA2	4.22691
YDR526C			14		0.159838		0.187513	0.125009	0.0587541
YDR527W	RBA50	1.63312			0.0817244		0.0958746	0.0639164	0.0843057
YDR528W	HLR1	0.896617	14	0.044392	0.0471969	0.0498919	0.0553688	0.0369126	0.0469159
YDR529C	QCR7	6.43643	28	0.159336	0.0967569	0.198817	0.11351	0.0756733	0.0289829
YDR530C	APA2	2.08143	36	0.0400761	0.0736916	0.0528437	0.0864509	0.057634	0.0563084
YDR531W					0.140124		0.164386	0.109591	0.120878
YDR532C			29		0.122226		0.143389	0.0955928	0.110601
YDR533C	HSP31	1.6011	62	0.0179	0.0534501	0.0277212	0.0627047	0.0418031	0.0298056
YDR534C	FIT1	0.032022	26	0.000853692	0.0197898	0.00105012	0.0232163	0.0154775	0.0245474
YDR535C		0.192132
YDR536W	STL1	0.288198	26	0.00768323	0.0352633	0.00945105	0.041369	0.0275793	0.047133
YDR537C
YDR538W	PAD1	0.768529
YDR539W		0.992683	16	0.0430047	0.0544543	0.0490939	0.0638828	0.0425886	0.0643513
YDR540C		0.512353			0.0458905		0.0538362	0.0358908	0.0193451
YDR541C		1.63312			0.0866577		0.101662	0.0677747	0.070079
YDR542W			10
YDR543C
YDR544C			10
YDR545C-A
YDR545W	YRF1-1
YEL001C		2.72187	25	0.0754664	0.0735663	0.0921625	0.086304	0.057536	0.0389519
YEL002C	WBP1	6.50048	29	0.155372	0.101337	0.195246	0.118883	0.0792553	0.102398
YEL003W	GIM4	3.55445	17	0.144927	0.130175	0.16673	0.152715	0.10181	0.0430655
YEL004W	YEA4	0.736507	51	0.01001		0.0145277
YEL005C	VAB2	0.960661	41	0.016241	0.0426955	0.0221337	0.050088	0.033392	0.0283164
YEL006W	YEA6	1.12077	51	0.0152325		0.0221074
YEL007W		2.11346	20	0.0732468		0.0862108
YEL008C-A
YEL008W					0.105184		0.123396	0.0822643	0.0312604
YEL009C	GCN4	25.6497	19	0.935736	1.1619	1.09307	1.36308	0.90872	0.767868
YEL009C-A					0.0176782		0.0207391	0.0138261	0.00562721
YEL010W			70
YEL011W	GLC3	4.6432
YEL012W	UBC8	1.44099	34	0.029377	0.0683179	0.0382162	0.0801468	0.0534312	0.0416229
YEL013W	VAC8	1.02471	36	0.0197298	0.153545	0.0260154	0.180131	0.120087	0.208472
YEL014C			38		0.220995		0.25926	0.17284	0.0527161
YEL015W	EDC3		14		0.123224		0.144559	0.096373	0.159497
YEL016C	NPP2		21		0.0545416		0.0639852	0.0426568	0.0631747
YEL017C-A	PMP2		29
YEL017W	GTT3		17		0.0617567		0.0724496	0.0482998	0.0489277
YEL018C-A
YEL018W	EAF5	1.44099	22	0.0454009	0.180604	0.05424	0.211875	0.14125	0.118509
YEL019C	MMS21	0.128088	40	0.0022196	0.032823	0.0030053	0.0385062	0.0256708	0.0206136
YEL020C		0.352243	32	0.00762987	0.105269	0.00979054	0.123496	0.082331	0.138481
YEL020C-B
YEL020W-A	TIM9
YEL021W	URA3	0.0640441	32	0.00138725		0.0017801
YEL022W	GEA2	1.98537
YEL023C		0.128088			0.0374147		0.0438929	0.0292619	0.0599284
YEL024W	RIP1	3.36232	15	0.155372	0.0387606	0.175997	0.0454719	0.0303146	0.0196135
YEL025C		2.11346	19	0.0771019	0.0777289	0.0900659	0.0911873	0.0607915	0.216783
YEL026W	SNU13	25.9058	16	1.12228		1.28119
YEL027W	CUP5	31.0294	25	0.860317	0.0747373	1.05065	0.0876777	0.0584518	0.0281738
YEL028W		0.608419	36	0.0117146	0.0908407	0.0154466	0.106569	0.0710463	0.0327523
YEL029C	BUD16	3.23423	27	0.0830295	0.0546936	0.102868	0.0641636	0.0427757	0.0401236
YEL030C-A					0.0667402		0.0782959	0.0521973	0.0163899
YEL030W	ECM10	0.704485	249	0.00196109	0.0387123	0.00628244	0.0454151	0.0302767	0.0585552
YEL031W	SPF1	1.95334
YEL032C-A
YEL032W	MCM3	0.768529	7	0.0761005	0.147475	0.0808147	0.17301	0.11534	0.336216
YEL033W			33		0.171948		0.20172	0.13448	0.0563471
YEL034C-A					0.269832		0.316552	0.211035	0.127043
YEL034W	HYP2		18		0.334743		0.392702	0.261801	0.123832
YEL035C	UTR5	0.0640441	50	0.00088784	0.422083	0.00128069	0.495165	0.33011	0.165055
YEL036C	ANP1	2.24154	13	0.119517		0.133267
YEL037C	RAD23	5.73195	10	0.397308		0.432468
YEL038W	UTR4	6.5325	26	0.174153	0.0714257	0.214224	0.0837927	0.0558618	0.0381536
YEL039C	CYC7	6.34037			0.0269264		0.0315886	0.021059	0.00718113
YEL040W	UTR2	38.0422	9	2.92987	0.514515	3.16322	0.603601	0.402401	0.564569
YEL041W	YEF1	0.032022	43	0.000516186		0.000712611
YEL042W	GDA1	3.87467	11	0.244156	0.0988734	0.267923	0.115993	0.0773286	0.120323
YEL043W		2.01739	20	0.0699174		0.0822921
YEL044W	IES6	2.30559	14	0.114151	0.195207	0.128293	0.229006	0.152671	0.0763354
YEL045C			17		0.0450617		0.0528639	0.0352426	0.0149781
YEL046C	GLY1	13.6414	9	1.05061	1.02443	1.13429	1.2018	0.801202	0.931798
YEL047C		1.79323			0.154629		0.181402	0.120935	0.17076
YEL048C		0.512353	21	0.0169112		0.020054
YEL049W	PAU2				0.0166661		0.0195518	0.0130345	0.00471849
YEL050C	RML2		19
YEL050W-A
YEL051W	VMA8	18.1245	19	0.661207	0.195563	0.772383	0.229424	0.152949	0.117771
YEL052W	AFG1	1.95334	20	0.0676978		0.0796797
YEL053C	MAK10	1.15279	15	0.0532704	0.0526457	0.0603417	0.0617611	0.041174	0.0906241
YEL053W-A
YEL054C	RPL12A	19.9818	22	0.629559		0.752128
YEL055C	POL5		35		0.0586184		0.0687679	0.0458453	0.140653
YEL056W	HAT2		24
YEL057C			96		0.0326919		0.0383523	0.0255682	0.0179233
YEL058W	PCM1		33		0.2444		0.286717	0.191145	0.319785
YEL059C-A	SOM1	1.40897	25	0.0390649		0.0477076
YEL059W		0.0640441	27	0.00164415	0.0226473	0.002037	0.0265686	0.0177124	0.00545541
YEL060C	PRB1	7.87742
YEL061C	CIN8	0.512353	20	0.0177568	0.0807939	0.0208996	0.094783	0.0631887	0.189692
YEL062W	NPR2	0.448309			0.0908085		0.106532	0.0710211	0.131176
YEL063C	CAN1	0.896617			0.174023		0.204155	0.136103	0.241175
YEL064C	AVT2	0.192132			0.0401068		0.0470511	0.0313674	0.0452318
YEL065W	SIT1	1.6011	13	0.0853692		0.0951904
YEL066W	HPA3	0.608419			0.0528546		0.0620061	0.0413374	0.0222809
YEL067C		0.0640441	30	0.00147973	0.0224623	0.00187258	0.0263516	0.0175677	0.0103123
YEL068C		1.12077	37	0.0209962		0.0278711
YEL069C	HXT13
YEL070W	DSF1		41		0.00571931		0.00670958	0.00447306	0.00674537
YEL071W	DLD3	12.2004	38	0.222544	0.389456	0.297382	0.456888	0.304592	0.453842
YEL072W	RMD6	1.05673	76	0.00963773	0.03324	0.0161197	0.0389954	0.0259969	0.0180679
YEL073C		0.0640441
YEL074W		0.0640441	14	0.00317086		0.00356371
YEL075C
YEL075W-A
YEL076C			5
YEL076C-A
YEL077C			6		0.108863		0.127713	0.0851417	0.326348
YEL077W-A
YER001W	MNN1	3.84265	48	0.05549		0.0790609
YER002W	NOP16	6.62856			0.278296		0.326482	0.217655	0.15127
YER003C	PMI40	2.72187	33	0.0571715	0.0837913	0.0738676	0.0982994	0.0655329	0.0905665
YER004W		4.38702	38	0.0800224	0.205864	0.106933	0.241509	0.161006	0.111899
YER005W	YND1	1.02471	68	0.0104452	0.118542	0.0167308	0.139067	0.0927113	0.17541
YER006C-A
YER006W	NUG1		10		0.208645		0.244771	0.163181	0.254888
YER007C-A	TMA20	5.05948	19	0.184577	0.0891796	0.215612	0.104621	0.0697471	0.0451961
YER007W	PAC2	3.65051			0.0464237		0.0544617	0.0363078	0.056495
YER008C	SEC3	1.47301	46	0.022196	0.088467	0.0312315	0.103785	0.0691897	0.277451
YER009W	NTF2	19.8857			0.125366		0.147072	0.0980482	0.0369642
YER010C		9.41448			0.0553599		0.0649452	0.0432968	0.030481
YER011W	TIR1	2.27357	49	0.0321615		0.0461077
YER012W	PRE1	2.91401	14	0.144274	0.154024	0.162149	0.180692	0.120462	0.0717951
YER013W	PRP22	0.352243			0.0552134		0.0647733	0.0431822	0.148417
YER014C-A	BUD25
YER014W	HEM14
YER015W	FAA2	0.640441			0.02325		0.0272756	0.0181838	0.0406225
YER016W	BIM1	1.21684	10	0.0843448		0.0918089
YER017C	AFG3	0.960661	10	0.066588	0.113467	0.0724807	0.133114	0.0887424	0.202776
YER018C	SPC25	0.512353	16	0.022196	0.363116	0.0253388	0.425988	0.283992	0.188855
YER019C-A	SBH2		14
YER019W	ISC1				0.126699		0.148636	0.0990906	0.141997
YER020W	GPA2	2.14548	21	0.0708158		0.0839762
YER021W	RPN3	5.60386	18	0.215794	0.218917	0.250169	0.256822	0.171215	0.268978
YER022W	SRB4	1.85728	23	0.0559725	0.0780584	0.0673651	0.0915738	0.0610492	0.125945
YER023C-A
YER023W	PRO3	7.23698	40	0.125407		0.169799
YER024W	YAT2	0.256176	19	0.00934568	0.0827019	0.0109171	0.0970213	0.0646809	0.179231
YER025W	GCD11	4.57915	8	0.396753	0.212171	0.424842	0.248907	0.165938	0.26268
YER026C	CHO1	2.81794	13	0.15025	0.0977255	0.167535	0.114646	0.0764308	0.0634376
YER027C	GAL83	5.28364	18	0.203463	0.0977059	0.235873	0.114623	0.0764155	0.0957487
YER028C	MIG3	1.53706			0.0490319		0.0575215	0.0383477	0.0454037
YER029C	SMB1	1.3129			0.139255		0.163366	0.108911	0.0642572
YER030W		8.26169	21	0.272694	0.182801	0.323371	0.214452	0.142968	0.0659081
YER031C	YPT31	10.6954			0.109682		0.128673	0.0857818	0.0575596
YER032W	FIR1	0.608419	16	0.0263577	0.0489057	0.0300898	0.0573735	0.038249	0.100595
YER033C	ZRG8	0.256176
YER034W		0.768529	26	0.0204886	0.116812	0.0252028	0.137037	0.091358	0.0508864
YER035W	EDC2	1.76121	18	0.0678211	1.14963	0.0786244	1.34868	0.899121	0.392916
YER036C	ARB1	12.5206	14	0.619902	0.52912	0.696704	0.620735	0.413823	0.758124
YER037W	PHM8		49		0.09483		0.111249	0.0741662	0.0715704
YER038C	KRE29		35		0.0321251		0.0376874	0.0251249	0.0350242
YER038W-A
YER039C	HVG1		16		0.0871476		0.102237	0.0681579	0.0510502
YER039C-A					0.0534492		0.0627037	0.0418024	0.00911293
YER040W	GLN3	0.32022	16	0.0138725	0.0588131	0.0158367	0.0689963	0.0459976	0.100827
YER041W	YEN1	0.544375
YER042W	MXR1	5.34768	33	0.112325	0.0437484	0.145128	0.0513232	0.0342155	0.0189554
YER043C	SAH1	5.6679	35	0.112248	0.306626	0.147015	0.359717	0.239811	0.323506
YER044C	ERG28	5.69992			0.0967994		0.11356	0.0757065	0.0337651
YER044C-A	MEI4	0.032022
YER045C	ACA1	0.960661	25	0.0266352		0.0325279
YER046W	SPO73		31		0.0796035		0.0933865	0.0622577	0.0268331
YER046W-A
YER047C	SAP1		12		0.093667		0.109885	0.0732567	0.19728
YER048C	CAJ1	12.2004	15	0.563778	0.159594	0.638616	0.187227	0.124818	0.146661
YER048W-A	ISD11	2.68985
YER049W		3.04209	14	0.150616	0.249638	0.169276	0.292862	0.195241	0.377597
YER050C	RSM18	5.60386	16	0.242769	0.121867	0.277143	0.142968	0.0953119	0.0396498
YER051W		0.864595	16	0.0374557	0.0429898	0.0427592	0.0504333	0.0336222	0.0496936
YER052C	HOM3	7.07687			0.170088		0.199538	0.133025	0.210579
YER053C	PIC2	8.00551			0.0761465		0.0893309	0.059554	0.0537177
YER053C-A		1.56908
YER054C	GIP2	0.896617
YER055C	HIS1	15.6588	9	1.20598	0.201587	1.30203	0.236491	0.15766	0.140791
YER056C	FCY2	11.2718	20	0.390649		0.459791
YER056C-A	RPL34A	33.431	25	0.926905	0.475497	1.13197	0.557827	0.371885	0.283376
YER057C	HMF1	7.10889	55	0.0895911	0.0970113	0.133197	0.113808	0.0758722	0.0295143
YER058W	PET117	1.18482			0.111862		0.131231	0.0874872	0.0282584
YER059W	PCL6	2.24154	18	0.0863177	0.0717242	0.100067	0.0841429	0.0560953	0.0707923
YER060W	FCY21	1.15279			0.0925641		0.108591	0.0723941	0.114817
YER060W-A	FCY22	0.832573	28	0.0206106	0.0477557	0.0257176	0.0560244	0.0373496	0.0594606
YER061C	CEM1	1.79323	21	0.0591893	0.0541029	0.0701891	0.0634706	0.0423137	0.0561927
YER062C	HOR2	22.1272	18	0.852079		0.987809
YER063W	THO1	1.79323	17	0.0731162	0.1077	0.084116	0.126347	0.0842315	0.0552559
YER064C		1.76121	21	0.0581324	0.138247	0.0689357	0.162184	0.108123	0.164022
YER065C	ICL1	0.448309			0.0819547		0.0961448	0.0640965	0.107234
YER066C-A		0.0640441
YER066W		0.480331	37	0.00899838	0.0665297	0.0119447	0.078049	0.0520327	0.0289822
YER067C-A
YER067W					0.0681069		0.0798993	0.0532662	0.0258341
YER068C-A		0.0640441
YER068W	MOT2	2.01739	20	0.0699174	0.166266	0.0822921	0.195054	0.130036	0.229254
YER069W	ARG5,6	0.544375	14	0.0269523	0.0652962	0.0302915	0.0766019	0.051068	0.132317
YER070W	RNR1	2.97805	7	0.29489	0.453527	0.313157	0.532053	0.354702	0.945636
YER071C		3.17018	36	0.061039		0.080485
YER072W	VTC1	74.3232			0.173969		0.204091	0.136061	0.0529277
YER073W	ALD5	6.02014			0.191372		0.224507	0.149671	0.233786
YER074W	RPS24A	52.324	16	2.26677		2.58772
YER074W-A	YOS1	12.2324			0.0539134		0.0632482	0.0421655	0.0198178
YER075C	PTP3	0.192132	21	0.00634171		0.00752026
YER076C		0.0640441	42	0.00105695	0.0469078	0.0014498	0.0550297	0.0366864	0.0333113
YER076W-A		0.32022			0.0420172		0.0492923	0.0328615	0.0114029
YER077C		0.992683	24	0.0286698	0.082072	0.034759	0.0962824	0.0641883	0.132613
YER078C		1.05673	27	0.0271284		0.0336105
YER078W-A		0.0640441
YER079C-A					0.0477132		0.0559746	0.0373164	0.0126129
YER079W		6.69261			0.06413		0.0752338	0.0501559	0.0316985
YER080W		2.01739	38	0.0367986	0.0986701	0.0491734	0.115754	0.0771696	0.14531
YER081W	SER3	2.1775			0.219062		0.256992	0.171328	0.241401
YER082C	UTP7	1.6011	16	0.0693625	0.251042	0.0791837	0.294509	0.196339	0.326708
YER083C	GET2	7.23698	16	0.313518		0.35791
YER084W		0.0640441	7	0.00634171		0.00673456
YER084W-A
YER085C			13
YER086W	ILV1	3.87467	17	0.157983	0.10487	0.181751	0.123028	0.0820186	0.141892
YER087C-A			20
YER087C-B	SBH1	12.2004
YER087W					0.0922832		0.108262	0.0721744	0.124862
YER088C	DOT6	4.77129	21	0.157486	0.152004	0.186753	0.178323	0.118882	0.23919
YER088C-A		0.192132
YER088W-B
YER089C	PTC2		18		0.195583		0.229447	0.152965	0.213233
YER090C-A
YER090W	TRP2	2.84996	20	0.0987722	0.0501332	0.116254	0.0588135	0.039209	0.0597153
YER091C	MET6	18.1885	21	0.600349		0.711918
YER091C-A		0.0640441
YER092W	IES5		12		0.185303		0.217388	0.144925	0.0546368
YER093C	TSC11				0.0898285		0.105382	0.0702546	0.301533
YER093C-A		0.512353	18	0.0197298		0.0228726
YER094C	PUP3	18.3486			0.269133		0.315733	0.210488	0.129871
YER095W	RAD51	0.768529			0.0598552		0.0702189	0.0468126	0.0562687
YER096W	SHC1	0.0640441	69	0.000643362		0.00103621
YER097W
YER098W	UBP9	0.832573	45	0.0128244	0.022799	0.0179314	0.0267465	0.017831	0.0403694
YER099C	PRS2	7.46114	18	0.287315	0.114419	0.333082	0.13423	0.0894869	0.0855494
YER100W	UBC6	3.2022	24	0.0924833	0.130046	0.112126	0.152563	0.101708	0.0764848
YER101C	AST2	0.704485			0.0396744		0.0465439	0.0310292	0.0400898
YER102W	RPS8B	102.855	21	3.39493	0.236897	4.02585	0.277914	0.185276	0.111536
YER103W	SSA4	20.0778			0.0675386		0.0792326	0.0528217	0.10184
YER104W	RTT105	0.32022	85	0.00261129	0.0518324	0.00457554	0.0608069	0.0405379	0.0253767
YER105C	NUP157	1.66515	25	0.0461677	0.0849167	0.0563817	0.0996196	0.0664131	0.277275
YER106W	MAM1	0.288198
YER107C	GLE2	1.85728
YER107W-A		2.4657
YER109C	FLO8	0.256176	16	0.011098	0.0608759	0.0126694	0.0714163	0.0476109	0.114219
YER110C	KAP123	2.24154	22	0.0706236	0.0392739	0.0843733	0.0460739	0.030716	0.102622
YER111C	SWI4	0.384265
YER112W	LSM4	1.95334	5	0.270791	0.138665	0.282773	0.162674	0.108449	0.061057
YER113C		0.32022			0.0848818		0.0995787	0.0663858	0.140738
YER114C	BOI2	0.512353	19	0.0186914	0.0501392	0.0218342	0.0588206	0.0392137	0.122425
YER115C	SPR6	1.24886	38	0.0227801	0.0937334	0.0304407	0.109963	0.0733086	0.0421524
YER116C	SLX8	0.384265	17	0.0156678	0.0641995	0.0180249	0.0753154	0.0502102	0.0413732
YER117W	RPL23B	30.9013	25	0.856765	0.541203	1.04632	0.63491	0.423273	0.374173
YER118C	SHO1	2.36963	10	0.16425		0.178786
YER119C	AVT6	0.896617			0.0345159		0.0404922	0.0269948	0.036335
YER119C-A			18
YER120W	SCS2	13.6734	16	0.592356	0.161951	0.676229	0.189992	0.126662	0.0929696
YER121W		0.544375	49	0.00770065		0.0110399
YER122C	GLO3	1.6011	17	0.0652823		0.0751036
YER123W	YCK3	0.736507			0.105742		0.124051	0.0827004	0.13017
YER124C	DSE1	4.57915	13	0.244156	0.960565	0.272245	1.12688	0.751255	1.29291
YER125W	RSP5	1.50504	19	0.0549059	0.183194	0.0641378	0.214914	0.143276	0.348017
YER126C	NSA2	1.21684	12	0.0702873	0.192854	0.0777514	0.226245	0.15083	0.118402
YER127W	LCP5	1.72919	11	0.108962		0.119569
YER128W		0.544375			0.0667676		0.0783281	0.0522187	0.0319057
YER129W	SAK1	0.384265			0.1115		0.130806	0.087204	0.298935
YER130C		3.23423	17	0.13187	0.363064	0.151709	0.425926	0.283951	0.377939
YER131W	RPS26B	61.3863	22	1.93408	0.340075	2.31062	0.398958	0.265972	0.0954838
YER132C	PMD1	0.608419
YER133W	GLC7	7.87742	19	0.28738	0.269026	0.3357	0.315606	0.210404	0.307821
YER133W-A
YER134C					0.0693843		0.0813978	0.0542652	0.0290862
YER135C		0.0640441	44	0.00100891		0.00140176
YER136W	GDI1	6.05217	27	0.155372		0.192496
YER137C		0.640441	45	0.00986489	0.0910838	0.0137934	0.106855	0.0712364	0.0317714
YER137W-A
YER138W-A
YER139C		0.704485	24	0.0203463	0.0763225	0.0246677	0.0895374	0.0596916	0.0405903
YER140W		0.512353			0.0862334		0.101164	0.0674429	0.11263
YER141W	COX15	1.82526	33	0.0383385	0.076734	0.0495347	0.0900201	0.0600134	0.0876196
YER142C	MAG1	0.608419	32	0.0131789	0.0504338	0.0169109	0.0591661	0.0394441	0.0351052
YER143W	DDI1	2.11346	25	0.0585974	0.114446	0.0715614	0.134262	0.0895079	0.115107
YER144C	UBP5	1.02471	29	0.0244921		0.0307777
YER145C	FTR1	2.62581	14	0.130005	0.142661	0.146112	0.167363	0.111575	0.135452
YER145C-A		0.0640441
YER146W	LSM5		16		0.244404		0.286721	0.191147	0.0537124
YER147C	SCC4	0.608419	22	0.0191693	0.143067	0.0229013	0.167839	0.111893	0.209687
YER147C-A					0.172123		0.201926	0.134617	0.0551931
YER148W	SPT15	9.38246	10	0.650343	0.152236	0.707895	0.178595	0.119064	0.0859639
YER148W-A
YER149C	PEA2		12		0.0833937		0.0978329	0.065222	0.0823101
YER150W	SPI1	21.2947			0.0442726		0.0519382	0.0346255	0.015443
YER151C	UBP3	3.84265
YER152C		12.0723	28	0.298853	0.168528	0.372905	0.197708	0.131806	0.175433
YER152W-A
YER153C	PET122		18
YER154W	OXA1	4.77129	13	0.2544	0.150181	0.283667	0.176185	0.117456	0.141887
YER155C	BEM2	3.39434			0.169276		0.198585	0.13239	0.860933
YER156C		3.23423	7	0.320256	0.386584	0.340095	0.45352	0.302346	0.307184
YER157W	COG3	0.800551	20	0.027745	0.0730426	0.0326556	0.0856896	0.0571264	0.137389
YER158C		0.416287			0.0768451		0.0901505	0.0601003	0.103433
YER158W-A
YER159C	BUR6		6		0.606325		0.711307	0.474205	0.20296
YER161C	SPT2	0.768529	27	0.0197298	0.148313	0.024444	0.173992	0.115995	0.116111
YER162C	RAD4	0.512353	22	0.0161425	0.0735246	0.0192853	0.0862551	0.0575034	0.130188
YER163C		5.21959	41	0.0882426	0.0851692	0.12026	0.0999159	0.0666106	0.0464942
YER164W	CHD1	1.6011	41	0.0270683	0.0732826	0.0368895	0.0859711	0.0573141	0.252526
YER165C-A		0.0640441
YER165W	PAB1	17.7402	15	0.819772	0.535306	0.928591	0.627992	0.418661	0.72554
YER166W	DNF1	1.56908
YER167W	BCK2	6.11621	24	0.176643	0.183391	0.21416	0.215144	0.143429	0.366462
YER168C	CCA1	2.59379	19	0.094625	0.0630842	0.110535	0.0740069	0.0493379	0.0809142
YER169W	RPH1	0.736507	24	0.0212712	0.116955	0.0257889	0.137205	0.09147	0.218613
YER170W	ADK2	1.21684	19	0.044392	0.0607768	0.0518561	0.0713	0.0475334	0.0321801
YER171W	RAD3	2.91401	9	0.224426		0.242301
YER172C	BRR2	1.21684
YER172C-A
YER173W	RAD24	0.448309	25	0.0124298	0.0626186	0.0151797	0.0734607	0.0489738	0.0969191
YER174C	GRX4	1.18482	14	0.0586608	0.0940586	0.0659286	0.110344	0.0735629	0.0539952
YER175C	TMT1	0.768529	55	0.00968552	0.0364039	0.0143997	0.0427071	0.0284714	0.0255958
YER175W-A		0.608419
YER176W	ECM32	1.34493	17	0.0548372	0.156131	0.063087	0.183165	0.12211	0.410899
YER177W	BMH1	25.7137	18	0.990188	0.712214	1.14792	0.835531	0.557021	0.447288
YER178W	PDA1	15.1785	43	0.244672	0.123603	0.337777	0.145004	0.0966692	0.121997
YER179W	DMC1	0.192132	57	0.00233642	0.0225546	0.00351497	0.0264599	0.0176399	0.0193333
YER180C	ISC10	0.832573	33	0.0174878	0.14499	0.0225948	0.170094	0.113396	0.0910571
YER180C-A	SLO1	0.192132
YER181C		0.0640441	106	0.000418792		0.000811642
YER182W			27		0.0608348		0.0713681	0.0475787	0.0349228
YER183C	FAU1		44		0.0799783		0.0938262	0.0625508	0.0397198
YER184C		0.256176	18	0.00986489		0.0114363
YER185W		0.192132			0.00981955		0.0115198	0.00767984	0.00699633
YER186C		2.01739
YER187W		0.256176			0.0949342		0.111372	0.0742478	0.0315553
YER188C-A
YER188W		0.192132
YER189W
YER190C-A
YER190C-B
YER190W	YRF1-2
YFL001W	DEG1	1.56908			0.0980943		0.115079	0.0767193	0.101883
YFL002C	SPB4	1.50504
YFL003C	MSH4	0.128088			0.0995381		0.116773	0.0778485	0.205209
YFL004W	VTC2	9.25437	19	0.337613	0.22971	0.394379	0.269483	0.179655	0.446623
YFL005W	SEC4	6.43643			0.17718		0.207858	0.138572	0.0896559
YFL007W	BLM10	1.95334			0.059723		0.0700638	0.0467092	0.300387
YFL008W	SMC1	1.37695	27	0.0353492	0.0732053	0.0437954	0.0858804	0.0572536	0.210522
YFL009W	CDC4	1.53706	34	0.0313355	0.0890915	0.0407639	0.104517	0.0696782	0.162977
YFL010C	WWM1
YFL010W-A	AUA1
YFL011W	HXT10	0.0640441
YFL012W		0.032022
YFL012W-A		0.0640441
YFL013C	IES1				0.11474		0.134606	0.0897376	0.186475
YFL013W-A			42
YFL014W	HSP12	2.24154
YFL015C			24
YFL015W-A
YFL016C	MDJ1	5.18757	59	0.0609449	0.539928	0.0927657	0.633414	0.422276	0.648194
YFL017C	GNA1		20		0.164905		0.193457	0.128971	0.0617773
YFL017W-A	SMX2		71
YFL018C	LPD1	8.71	32	0.188666	0.0637449	0.242093	0.074782	0.0498547	0.0747322
YFL019C		0.128088	28	0.00317086		0.00395655
YFL020C	PAU5	0.0640441	10	0.0044392	0.0101605	0.00483205	0.0119198	0.00794652	0.00292432
YFL021C-A		0.0640441
YFL021W	GAT1	0.960661			0.0338683		0.0397324	0.0264883	0.04058
YFL022C	FRS2	8.9982	19	0.328267	0.152478	0.383462	0.178879	0.119253	0.180191
YFL023W	BUD27	0.800551			0.156294		0.183355	0.122237	0.292146
YFL024C	EPL1	1.15279
YFL025C	BST1	0.640441			0.139417		0.163556	0.109037	0.336817
YFL026W	STE2	2.78592	45	0.0429123	0.485779	0.0600012	0.569889	0.379926	0.492005
YFL027C	GYP8	1.3129
YFL028C	CAF16	3.87467	14	0.191837	0.0960495	0.215604	0.11268	0.07512	0.0652793
YFL029C	CAK1				0.0610576		0.0716294	0.0477529	0.0528148
YFL030W	AGX1
YFL031C-A
YFL031W	HAC1		17		0.893024		1.04765	0.698431	0.676082
YFL032W			16		0.184225		0.216122	0.144082	0.0461061
YFL033C	RIM15	0.448309
YFL034C-A	RPL22B	15.4026	12	0.889689		0.98417
YFL034C-B	MOB2	0.992683			0.101816		0.119445	0.0796297	0.0777983
YFL034W		0.448309			0.0362715		0.0425517	0.0283678	0.0913727
YFL036W	RPO41	0.672463			0.124841		0.146456	0.0976376	0.39592
YFL037W	TUB2	12.8408	39	0.22822	0.0890114	0.306987	0.104423	0.0696155	0.0955821
YFL038C	YPT1	6.18026	29	0.147718	0.278727	0.185628	0.326987	0.217991	0.135155
YFL039C	ACT1	56.8071	46	0.855993	0.183889	1.20445	0.215728	0.143819	0.20638
YFL040W		0.0640441	37	0.00119978		0.00159263
YFL041W	FET5	1.56908			0.109998		0.129044	0.0860294	0.160703
YFL041W-A		0.416287
YFL042C		1.72919
YFL044C	OTU1	1.3129			0.256518		0.300933	0.200622	0.181563
YFL045C	SEC53	19.4694	23	0.586746	0.338905	0.706172	0.397584	0.265056	0.202503
YFL046W		4.6432			0.0710692		0.0833745	0.055583	0.0346282
YFL047W	RGD2	0.32022			0.0821654		0.096392	0.0642613	0.137776
YFL048C	EMP47	4.96342			0.144915		0.170007	0.113338	0.151533
YFL049W	SWP82	0.480331			0.135965		0.159507	0.106338	0.198958
YFL050C	ALR2	0.448309			0.0945076		0.110871	0.0739141	0.190403
YFL051C		0.0640441	44	0.00100891	0.0316609	0.00140176	0.0371428	0.0247619	0.0119352
YFL052W		0.128088			0.0122632		0.0143865	0.00959098	0.0133986
YFL053W	DAK2	0.224154			0.0110187		0.0129265	0.00861769	0.0152964
YFL054C		0.192132
YFL055W	AGP3	0.128088	26	0.00341477	0.0226808	0.00420047	0.0266079	0.0177386	0.0297299
YFL056C	AAD6				0.0897856		0.105332	0.070221	0.044801
YFL057C	AAD16				0.0698042		0.0818905	0.0545937	0.0250039
YFL058W	THI5				0.00944699		0.0110827	0.00738847	0.00755101
YFL059W	SNZ3		27		0.0306987		0.0360141	0.0240094	0.0215124
YFL060C	SNO3				0.0363282		0.0426182	0.0284122	0.0189793
YFL061W					0.0190845		0.0223889	0.0149259	0.0101048
YFL062W	COS4
YFL063W
YFL064C			3
YFL065C
YFL066C			3
YFL067W					0.0338321		0.03969	0.02646	0.0139444
YFL068W
YFR001W	LOC1	2.33761			0.115009		0.134922	0.0899482	0.0552282
YFR002W	NIC96	3.45838			0.160108		0.18783	0.12522	0.315429
YFR003C	YPI1	5.09151	29	0.121695	0.149586	0.152927	0.175486	0.116991	0.0546347
YFR004W	RPN11	10.3431	8	0.896163	0.27762	0.959608	0.325689	0.217126	0.199756
YFR005C	SAD1	1.3129	20	0.0455018	0.0631712	0.0535552	0.074109	0.049406	0.0665004
YFR006W		1.08875			0.0940527		0.110337	0.0735583	0.118208
YFR007W		0.800551			0.0745874		0.0875018	0.0583345	0.061893
[truncated: 4,577 more rows]
