# Supplementary material for: A Complete Set of Nascent Transcription Rates for Yeast Genes
Source: PLoS One. 2010 Nov 16;5(11):e15442. doi: 10.1371/journal.pone.0015442 (PMC2982843; doi:10.1371/journal.pone.0015442)
Supplement: Table S2 — Nascent TR datasets from to other physiological conditions. We used previously published GRO datasets to expand the change from cells growing in glucose to galactose [10] oxidative stress [36] and osmotic stress [37]. (XLS) [file pone.0015442.s003.xls]

## Sheet: Sup.table2
ORF	gene name	TR (mol/min) exp. YPD	TR (mol/min) exp. YPGAL [García-Martínez et al. 2004]	TR (mol/min) YPD +NACl 10min [Romero-Santacreu et al. 2009]	TR (mol/min) YPD +0.1 mM terbutyl 16min [Molina-Navarro et al. 2009]
YAL001C	TFC3	0.0940812	0.0772202
YAL002W	VPS8	0.0609133	0.0330097	0.0847166	0.072167
YAL003W	EFB1	1.78133	0.306184	0.68501	1.2869
YAL004W		0.52997	0.0927101	0.903479
YAL005C	SSA1	1.20342	0.25805	2.57571	3.39421
YAL007C	ERP2	0.0606609	0.0199975	0.155883	0.0464015
YAL008W	FUN14	0.0379475	0.0187373	0.183694	0.104468
YAL009W	SPO7
YAL010C	MDM10
YAL011W	SWC3	0.110558	0.0812623	0.135703	0.113695
YAL012W	CYS3
YAL013W	DEP1	0.253392	0.0849529	0.43762	0.144064
YAL014C	SYN8	0.176694	0.0338945	0.344544	0.395623
YAL015C	NTG1
YAL016C-A
YAL016C-B
YAL016W	TPD3	0.188948	0.0590161	0.269112	0.25756
YAL017W	PSK1	0.068824	0.0938826	0.239634	0.256787
YAL018C
YAL019W	FUN30	0.142656	0.062064	0.0748072
YAL019W-A
YAL020C	ATS1	0.101735	0.0199387	0.162145	0.0717836
YAL021C	CCR4	0.222883	0.0463555	0.219448	0.178388
YAL022C	FUN26
YAL023C	PMT2	0.305488	0.032851	0.230819	0.25061
YAL024C	LTE1	0.0854588	0.0415089	0.0772252	0.0806283
YAL025C	MAK16
YAL026C	DRS2
YAL026C-A
YAL027W		0.0736615	0.0310062	0.19398
YAL028W	FRT2
YAL029C	MYO4	0.0797402	0.0729354	0.102242	0.0411487
YAL030W	SNC1	0.0972422	0.0498627	0.178392	0.0811152
YAL031C	GIP4	0.094115	0.0283403	0.148666	0.233669
YAL031W-A
YAL032C	PRP45
YAL033W	POP5	0.100896	0.0180684	0.16639	0.0635526
YAL034C	FUN19	0.121074	0.0432732	0.602524
YAL034C-B
YAL034W-A	MTW1	0.256128	0.159706	0.33014	0.258717
YAL035W	FUN12	0.259886	0.245828	0.140874	0.151161
YAL036C	RBG1	0.107829	0.0535927	0.0626587	0.0571229
YAL037C-A
YAL037C-B
YAL037W		0.0273964	0.0165945	0.0519152
YAL038W	CDC19
YAL039C	CYC3
YAL040C	CLN3	0.162876	0.0761774	0.200016	0.177342
YAL041W	CDC24	0.136073	0.0415834	0.17892	0.154297
YAL042C-A
YAL042W	ERV46	0.244191	0.0636237	0.417149	0.212333
YAL043C	PTA1
YAL044C	GCV3	0.129625	0.0177565	0.295551	0.25749
YAL044W-A
YAL045C		0.141765	0.0218991	0.335426
YAL046C		0.193165	0.0273722	0.339474
YAL047C	SPC72	0.0493579	0.0154244	0.0939969	0.0352396
YAL047W-A
YAL048C	GEM1	0.0718035	0.0209285	0.148907
YAL049C		0.112543	0.0497742	0.180588
YAL051W	OAF1	0.0409066	0.0425181	0.0601872	0.0476629
YAL053W	FLC2	0.0999731	0.04876	0.157768
YAL054C	ACS1	0.0584623	0.0287398
YAL055W	PEX22	0.0917025	0.0428217	0.331407	0.13348
YAL056C-A
YAL056W	GPB2
YAL058W	CNE1
YAL059C-A
YAL059W	ECM1	0.167526	0.0615328	0.229531	0.0460428
YAL060W	BDH1
YAL061W		0.0591775	0.221848	0.964851
YAL062W	GDH3	0.0702318	0.0739884	0.157717	0.067531
YAL063C	FLO9
YAL063C-A
YAL064C-A
YAL064W
YAL064W-B		0.0670362	0.0606026	0.0577035
YAL065C		0.110286	0.0555792	0.162825
YAL066W
YAL067C	SEO1
YAL067W-A
YAL068C
YAL068W-A
YAL069W
YAR002C-A	ERP1	0.0906419	0.0348498	0.134401	0.0693397
YAR002W	NUP60	0.176774	0.0687548	0.204378	0.220777
YAR003W	SWD1	0.0947554	0.0389056	0.150269	0.0704086
YAR007C	RFA1	0.0935003	0.0159794	0.148706	0.187881
YAR008W	SEN34	0.0281434	0.0137931	0.0263834	0.0214667
YAR014C	BUD14
YAR015W	ADE1	0.159009	0.0256781	0.0454974	0.180692
YAR018C	KIN3	0.0737232	0.0407169	0.0314994	0.0437041
YAR019C	CDC15	0.0407559	0.022522	0.0732277	0.0495111
YAR019W-A
YAR020C	PAU7
YAR023C
YAR027W	UIP3
YAR028W		0.202049	0.0346391	0.407891
YAR029W		0.241363	0.179587	0.161693
YAR030C
YAR031W	PRM9	0.0651606	0.0269653	0.195779	0.0928282
YAR033W	MST28	0.0515081	0.0250335	0.11954	0.0288334
YAR035C-A
YAR035W	YAT1
YAR042W	SWH1	0.188472	0.0304798	0.250255	0.127579
YAR047C
YAR050W	FLO1	0.0975614	0.0597371	0.153846	0.0700514
YAR053W
YAR060C		0.0467804	0.0125765
YAR064W		0.0658672	0.0347735
YAR066W
YAR068W		0.288577	0.230601	0.158503
YAR069C
YAR070C
YAR071W	PHO11
YAR073W	IMD1	0.0588307	0.0119771	0.0347304	0.0133859
YAR075W
YBL001C	ECM15
YBL002W	HTB2	0.616727	0.106697	0.909895	0.43994
YBL003C	HTA2	0.689429	0.169894	1.51728	0.411269
YBL004W	UTP20	0.167657	0.0584156	0.0661988
YBL005W	PDR3	0.132444	0.0610724	0.179188	0.0953332
YBL006C	LDB7	0.282246	0.0822429	0.469868
YBL006W-A
YBL007C	SLA1	0.173265	0.0705233	0.288759	0.279077
YBL008W	HIR1
YBL008W-A
YBL009W		0.0584386	0.020838	0.0402057
YBL010C		0.0531977	0.0187726	0.0837835
YBL011W	SCT1	0.120458	0.0577827	0.202477	0.129614
YBL012C		0.112207	0.0377165	0.229113
YBL013W	FMT1
YBL014C	RRN6	0.164043	0.062002	0.192627	0.0835541
YBL015W	ACH1	0.0769129		0.0791148
YBL016W	FUS3
YBL017C	PEP1
YBL018C	POP8	0.192327	0.0861881
YBL019W	APN2	0.0548443	0.0972373	0.094829	0.0660816
YBL020W	RFT1	0.0736039	0.0467043	0.0696968	0.0263007
YBL021C	HAP3	0.269242	0.0338366	0.495072	0.202319
YBL022C	PIM1	0.052602	0.0328978	0.0689517	0.120326
YBL023C	MCM2
YBL024W	NCL1	0.276697	0.0986097	0.132175	0.129558
YBL025W	RRN10	0.133873	0.077747	0.297221	0.0892203
YBL026W	LSM2	0.122028	0.0898462
YBL027W	RPL19B	0.603747	0.207497	0.0828783	0.532425
YBL028C
YBL029C-A
YBL029W
YBL030C	PET9	0.109204	0.115355	0.0769295	0.107409
YBL031W	SHE1	0.0436692	0.0710736	0.0707086
YBL032W	HEK2	0.19741	0.0387006	0.21517
YBL033C	RIB1	0.247467	0.0871403	0.511752	0.273366
YBL034C	STU1
YBL035C	POL12	0.101986	0.0365802	0.0677469	0.114545
YBL036C		0.152699	0.0677575	0.163715
YBL037W	APL3	0.047364	0.0645348	0.0352946	0.0511217
YBL038W	MRPL16
YBL039C	URA7
YBL039C-A
YBL039W-B
YBL040C	ERD2	0.116926	0.0564997	0.169164	0.125319
YBL041W	PRE7	0.336195	0.0952768	0.54921	0.302837
YBL042C	FUI1	0.323195	0.280957	0.0555785	0.411913
YBL043W	ECM13
YBL044W
YBL045C	COR1	0.0535588	0.0464358	0.083869	0.0507331
YBL046W	PSY4	0.112829	0.044561	0.172698
YBL047C	EDE1	0.243286	0.117972	0.447095	0.440237
YBL048W
YBL049W	MOH1	0.0893533	0.11705
YBL050W	SEC17
YBL051C	PIN4	0.141248	0.0641517	0.145354	0.09832
YBL052C	SAS3	0.10546	0.0718547	0.0723737	0.0748004
YBL053W		0.160291	0.218893	0.0799424
YBL054W
YBL055C		0.184924	0.0845283	0.125383
YBL056W	PTC3	0.216598	0.0897733	0.321559	0.10609
YBL057C	PTH2	0.181947	0.0780462	0.295647
YBL058W	SHP1	0.388315	0.106206	0.812218	0.44203
YBL059C-A
YBL059W		0.115128	0.0432322	0.315587
YBL060W		0.0828815	0.0640975	0.076925
YBL061C	SKT5	0.091366	0.0382711	0.0595267	0.0582953
YBL062W		0.124721	0.0600842	0.0549511
YBL063W	KIP1	0.0669992	0.037524	0.0526106	0.0487158
YBL064C	PRX1	0.035595	0.0675028	0.220433	0.0902628
YBL065W
YBL066C	SEF1	0.0567557	0.0289507	0.0483054	0.0512993
YBL067C	UBP13	0.105625	0.0607331	0.106601	0.170046
YBL068W	PRS4	0.0563758	0.0254069	0.0333416	0.0248655
YBL068W-A
YBL069W	AST1	0.175548	0.0952934	0.107197	0.0490084
YBL070C
YBL071C
YBL071C-B
YBL071W-A	KTI11	0.118502	0.0517266	0.0512852	0.0392166
YBL072C	RPS8A	0.451989	0.163823	0.101052	0.225152
YBL073W		0.0741499	0.0272304	0.0985022
YBL074C	AAR2	0.0769946	0.0317802	0.108559	0.0563062
YBL075C	SSA3	0.100362	0.040399	0.140189	0.153607
YBL076C	ILS1	0.0770466	0.0233653	0.0493926	0.0503207
YBL077W		0.263687	0.104103	0.0889574
YBL078C	ATG8	0.102667	0.0461554	0.397722	0.153476
YBL079W	NUP170	0.112409	0.083514	0.082037	0.0389003
YBL080C	PET112	0.058546	0.0164476	0.115447	0.086838
YBL081W
YBL082C	ALG3	0.0623284	0.0131146	0.0430792	0.0192682
YBL083C		0.0410354	0.00865519
YBL084C	CDC27
YBL085W	BOI1
YBL086C		0.0805146	0.023626	0.261134
YBL087C	RPL23A	0.622805	0.151554	0.149818	0.323964
YBL088C	TEL1	0.0607026	0.056619	0.0587977	0.0532863
YBL089W	AVT5
YBL090W	MRP21	0.152117	0.0355331	0.435208	0.13364
YBL091C	MAP2	0.0668963	0.0388807	0.0989601	0.0535557
YBL091C-A	SCS22	0.596291	0.332104
YBL092W	RPL32	0.499054	0.234037	0.1397	0.20899
YBL093C	ROX3	0.295083	0.141295	0.503537	0.544433
YBL094C
YBL095W		0.167274	0.0617767	0.268527
YBL096C		0.279749	0.0662417	0.443463
YBL097W	BRN1
YBL098W	BNA4
YBL099W	ATP1	0.214765	0.0664489	0.199854	0.396679
YBL100C		0.142178	0.131106	0.332825
YBL100W-C
YBL101C	ECM21	0.0830705	0.0543663	0.0948207	0.0872523
YBL102W	SFT2	0.0667853	0.0248166	0.189609	0.0813351
YBL103C	RTG3	0.0933345	0.0511863	0.154612	0.199821
YBL104C		0.0431177	0.0120048	0.0491062
YBL105C	PKC1	0.107906	0.114816	0.0955858	0.105917
YBL106C	SRO77	0.0403247	0.0139438
YBL107C		0.108982	0.0682205	0.237674
YBL107W-A
YBL108C-A
YBL108W
YBL109W
YBL111C
YBL112C
YBL113C
YBL113W-A
YBR001C	NTH2	0.0884055	0.0875182	0.20591	0.10788
YBR002C	RER2	0.193661	0.0696422	0.212547	0.089087
YBR003W	COQ1	0.0641141	0.0151779	0.175183	0.0794806
YBR004C	GPI18
YBR005W	RCR1
YBR006W	UGA2	0.0725964	0.114919	0.253762	0.0711792
YBR007C	DSF2	0.0967208	0.0606814	0.091359
YBR008C	FLR1
YBR009C	HHF1	1.62305	1.29084	2.17781	1.29948
YBR010W	HHT1	1.85793	0.496913	2.40266	1.3617
YBR011C	IPP1	0.216394	0.0666416	0.292706	0.157299
YBR012C
YBR013C
YBR014C		0.0512066	0.0671125	0.248024
YBR015C	MNN2	0.163638	0.025756	0.194921	0.0512082
YBR016W		0.31168	0.0576439	1.1039
YBR017C	KAP104
YBR018C	GAL7
YBR019C	GAL10	0.0432499	0.326353	0.0656918	0.0577019
YBR020W	GAL1	0.0615329	0.260344	0.0533125	0.0545844
YBR021W	FUR4	0.0543231	0.0747746	0.0522036	0.0181044
YBR022W	POA1	0.0852595	0.0219654	0.257379
YBR023C	CHS3
YBR024W	SCO2	0.0814063	0.0484984	0.202773	0.107977
YBR025C		0.193426	0.0533926	0.163885
YBR026C	ETR1	0.0500284	0.0151185	0.118654	0.0326835
YBR027C
YBR028C		0.109543	0.0551713	0.104867
YBR029C	CDS1	0.0334344	0.0128747	0.0293299	0.0136106
YBR030W		0.128975	0.0697223	0.0694843
YBR031W	RPL4A
YBR032W		0.299361	0.416144
YBR033W		0.0497219	0.0644883	0.044793	0.0362898
YBR034C	HMT1	0.205303	0.218069	0.10199	0.0646296
YBR035C	PDX3	0.181841	0.0392363	0.384089	0.0976169
YBR036C	CSG2	0.132113	0.0450866	0.235739	0.152807
YBR037C	SCO1	0.102394	0.0278767	0.234823	0.216209
YBR038W	CHS2	0.0401277	0.0172953	0.0338548
YBR039W	ATP3	0.135575	0.132552	0.155415	0.207948
YBR040W	FIG1
YBR041W	FAT1	0.13238	0.0589181	0.197677	0.113377
YBR042C
YBR043C	QDR3	0.186444	0.0689201	0.218749
YBR044C	TCM62	0.123174	0.0606343	0.262066	0.132312
YBR045C	GIP1
YBR046C	ZTA1	0.0636965	0.0288581	0.262063	0.123926
YBR047W
YBR048W	RPS11B	0.402574	0.209114	0.0944888	0.220912
YBR049C	REB1	0.160046	0.0778108	0.189756	0.207834
YBR050C	REG2	0.0672157	0.0250622
YBR051W
YBR052C	RFS1	0.201053	0.103448	0.983636
YBR053C		0.0390402	0.01118	0.363446
YBR054W	YRO2	0.077996	0.131414
YBR055C	PRP6
YBR056C-B
YBR056W
YBR056W-A
YBR057C	MUM2	0.127835	0.0621467	0.221297	0.041033
YBR058C	UBP14	0.115613	0.0511081	0.152749	0.0773136
YBR058C-A	TSC3
YBR059C	AKL1	0.0569341	0.0256443	0.138664	0.124388
YBR060C	ORC2	0.131051	0.0520441	0.165272	0.064784
YBR061C	TRM7	0.123396	0.0431568	0.0966177	0.0647228
YBR062C		0.205421	0.0760868	0.604547
YBR063C		0.0493043	0.086478
YBR064W
YBR065C	ECM2	0.0511271	0.0160533	0.141402	0.028658
YBR066C	NRG2
YBR067C	TIP1	0.324415	0.197843	0.495798	0.0808696
YBR068C	BAP2	0.857136	0.273639	0.927168	0.941612
YBR069C	TAT1
YBR070C	ALG14	0.0649741	0.0198888	0.124861	0.0806458
YBR071W		0.254152	0.0686248	0.419539
YBR072C-A
YBR072W	HSP26	0.0308801	0.348751	0.60004	0.140646
YBR073W	RDH54	0.0749505	0.0300382	0.0919687	0.0612384
YBR074W		0.0813059	0.0247116
YBR076C-A
YBR076W	ECM8
YBR077C	SLM4
YBR078W	ECM33	0.994901	0.534957	0.569002	0.732394
YBR079C	RPG1	0.139398	0.0601283	0.0708935	0.0496161
YBR080C	SEC18
YBR081C	SPT7	0.110389	0.0496479	0.171417	0.0976097
YBR082C	UBC4	0.564398	0.0728184	0.878678	0.438116
YBR083W	TEC1
YBR084C-A	RPL19A	0.49229	0.163988	0.0862565	0.290936
YBR084W	MIS1	0.179103	0.0647254	0.0604549
YBR085C-A
YBR085W	AAC3
YBR086C	IST2
YBR087W	RFC5
YBR088C	POL30
YBR089C-A	NHP6B
YBR089W		0.110927	0.0554008	0.180895
YBR090C		0.33554	0.0807659	0.289467	0.285782
YBR091C	MRS5	0.176076	0.0237871	0.27532	0.123011
YBR092C	PHO3	0.385432	0.0730594	0.135619
YBR093C	PHO5	0.115733	0.0247919	0.0487168	0.022807
YBR094W		0.0639032	0.0417653	0.0503004
YBR095C	RXT2	0.106607	0.0411352	0.163254	0.12138
YBR096W		0.0468968	0.0176217	0.127605
YBR097W	VPS15	0.0748478	0.114316	0.110565	0.062786
YBR098W	MMS4
YBR099C
YBR101C	FES1	1.06989	0.115476	1.52359	0.769331
YBR102C	EXO84	0.100911	0.0438578	0.147872	0.100312
YBR103C-A
YBR103W	SIF2	0.134162	0.0848917	0.123259	0.16978
YBR104W	YMC2	0.0627582	0.0599806	0.0347406	0.0469535
YBR105C	VID24	0.0958493	0.0447355	0.114122	0.0721248
YBR106W	PHO88	0.748767	0.165896	0.753564	0.798912
YBR107C	IML3	0.111137	0.0442119	0.251706	0.0941383
YBR108W		0.0894472	0.0395125	0.226723
YBR109C	CMD1	0.190611	0.0655407	0.473918	0.241101
YBR109W-A
YBR110W	ALG1	0.0412142	0.0128601	0.083683	0.0458259
YBR111C	YSA1	0.105312	0.0349239	0.49945	0.124658
YBR111W-A	SUS1
YBR112C	CYC8	0.622895	0.195624	0.527526	0.489132
YBR113W		0.135408	0.0536212	0.180912
YBR114W	RAD16	0.0629379	0.049441	0.206536
YBR115C	LYS2	0.135495	0.0713525	0.0766158	0.145848
YBR116C		0.171351	0.0290617	0.61234
YBR117C	TKL2	0.0748965	0.0362605	1.4147	0.0638288
YBR118W	TEF2	0.31425	0.32901	0.155787	0.173435
YBR119W	MUD1	0.154432	0.0940415	0.354678
YBR120C	CBP6	0.0679454	0.0270671	0.187392	0.0759333
YBR121C	GRS1	0.399024	0.110984	0.178328	0.263635
YBR121C-A
YBR122C	MRPL36	0.18985	0.0795077	0.347772	0.243857
YBR123C	TFC1	0.112856	0.0431911	0.149455	0.14863
YBR124W		0.0497232	0.0227608	0.105569
YBR125C	PTC4	0.0910457	0.0316834	0.155073	0.0900775
YBR126C	TPS1
YBR126W-A
YBR126W-B
YBR127C	VMA2	0.201403	0.0691495	0.312475	0.207038
YBR128C	ATG14	0.0660997	0.0274702
YBR129C	OPY1	0.109332	0.0359008	0.419026	0.188378
YBR130C	SHE3	0.12799	0.0671224	0.250741	0.112575
YBR131C-A
YBR131W	CCZ1	0.0415923	0.0149084	0.0728844	0.0502468
YBR132C	AGP2
YBR133C	HSL7	0.100809	0.0512889	0.100547
YBR134W		0.0607689	0.0277607	0.0905553
YBR135W	CKS1	0.122532	0.0504425	0.166381	0.0907362
YBR136W	MEC1	0.0569426	0.0608399	0.0670313	0.0411116
YBR137W		0.0761585	0.0432793
YBR138C
YBR139W		0.0845985	0.0173976	0.277578
YBR140C	IRA1	0.0528856	0.0638006	0.0736104	0.0523958
YBR141C		0.0927582	0.0433241	0.119348
YBR141W-A
YBR142W	MAK5	0.157346	0.125168	0.0411409	0.0418198
YBR143C	SUP45	0.162673	0.106625	0.107929	0.063388
YBR144C		0.0655253	0.0384916	0.176109
YBR145W	ADH5	0.056447	0.0381624
YBR146W	MRPS9	0.11579	0.0593813	0.218847	0.131694
YBR147W
YBR148W	YSW1
YBR149W	ARA1	0.0956705	0.0309941	0.60299	0.482997
YBR150C	TBS1
YBR151W	APD1	0.124044	0.0442701	0.349508	0.335655
YBR152W	SPP381	0.118489	0.0574365	0.271055	0.0786481
YBR153W	RIB7	0.207618	0.0784442	0.315532	0.108546
YBR154C	RPB5	0.32895	0.268204	0.41908	0.221747
YBR155W	CNS1
YBR156C	SLI15	0.0791181	0.0296363	0.0621152	0.0785498
YBR157C	ICS2	0.13552	0.112338	0.165293	0.273076
YBR158W	AMN1	0.416778	0.210934	0.10724
YBR159W		0.089389	0.0421759	0.247739
YBR160W	CDC28	0.144914	0.0490132	0.683944	0.21773
YBR161W	CSH1	0.0447246	0.0196823
YBR162C	TOS1	0.163403	0.0547895	0.153491	0.128947
YBR162W-A	YSY6
YBR163W	DEM1	0.0478258	0.0403178	0.0717172	0.0227533
YBR164C	ARL1	0.135799	0.117484	0.429517	0.136962
YBR165W	UBS1	0.0724208	0.0381906	0.14798	0.0823447
YBR166C	TYR1	0.0775455	0.0733676	0.197336	0.0596133
YBR167C	POP7	0.0808603	0.0429506	0.22502	0.117372
YBR168W	PEX32	0.0319069		0.105375
YBR169C	SSE2	0.0949512	0.111535	0.820642	0.262899
YBR170C	NPL4
YBR171W	SEC66	0.0800705	0.0188043	0.194216
YBR172C	SMY2	0.309594	0.0893306	0.161616	0.129769
YBR173C	UMP1	0.431669	0.166019	0.594986	0.629026
YBR174C		0.169992	0.150684	0.199425
YBR175W	SWD3	0.0983089	0.0257722	0.156117	0.159975
YBR176W	ECM31	0.0434205	0.0483551	0.0994715	0.0534338
YBR177C	EHT1
YBR178W		0.0944657	0.105387	0.130478
YBR179C	FZO1	0.0736624	0.0460799	0.116147
YBR180W	DTR1	0.0397076	0.0128424	0.0441592	0.025254
YBR181C	RPS6B	0.261879	0.0861908		0.104388
YBR182C	SMP1
YBR182C-A
YBR183W	YPC1	0.0479809	0.0221777	0.495477	0.11248
YBR184W
YBR185C	MBA1	0.0653507	0.0158764	0.156235	0.064693
YBR186W	PCH2	0.0217581	0.0170541	0.0287685
YBR187W		0.282308	0.0638275	0.280386
YBR188C	NTC20	0.0940445	0.0820024	0.107096	0.059162
YBR189W	RPS9B
YBR190W		0.0745407	0.0580524	0.079148
YBR191W	RPL21A	0.621632	0.347246	0.109283	0.347906
YBR191W-A
YBR192W	RIM2	0.182279	0.102051	0.22782	0.155608
YBR193C	MED8
YBR194W		0.238387	0.211042	0.294977	0.1245
YBR195C	MSI1	0.0802909	0.0206674	0.141826	0.0305325
YBR196C	PGI1	0.931439	0.395349	1.14477	0.459051
YBR196C-A
YBR196C-B
YBR197C		0.217995	0.0506578	0.273622
YBR198C	TAF5
YBR199W	KTR4	0.106212	0.0286516	0.282151
YBR200W	BEM1
YBR200W-A
YBR201C-A
YBR201W	DER1	0.0794446	0.0857835	0.125958	0.0721871
YBR202W	CDC47	0.210582	0.098994	0.0637504	0.114703
YBR203W	COS111	0.0354977	0.0192535	0.0276957
YBR204C
YBR205W	KTR3
YBR206W		0.178003	0.0948289	0.192718
YBR207W	FTH1	0.153282	0.0395707	0.206746	0.260441
YBR208C	DUR1,2	0.107427	0.106382	0.0558677	0.0940512
YBR209W
YBR210W	ERV15	0.0581948	0.0345095	0.122443
YBR211C	AME1	0.0597132	0.0359078	0.143169	0.0705536
YBR212W	NGR1	0.10403	0.0322592	0.290788
YBR213W	MET8	0.046851	0.0163178	0.154417	0.16914
YBR214W	SDS24	0.112668	0.0317103	0.431199	0.203113
YBR215W	HPC2	0.106508	0.0705158	0.124848	0.0558
YBR216C	YBP1	0.0740097	0.0598325	0.201003
YBR217W	ATG12	0.0736439	0.034657	0.261996	0.0827992
YBR218C	PYC2
YBR219C		0.0767822	0.023873	0.0822031
YBR220C		0.141189	0.0557903	0.17672
YBR221C	PDB1
YBR221W-A
YBR222C	PCS60
YBR223C	TDP1	0.0751719	0.0285213	0.172305
YBR223W-A
YBR224W		0.0580391	0.0180829	0.181134
YBR225W		0.086747	0.0496081	0.194972
YBR226C
YBR227C	MCX1
YBR228W	SLX1
YBR229C	ROT2	0.0354451	0.0149651	0.0885927	0.0483618
YBR230C	OM14
YBR230W-A
YBR231C	SWC5
YBR232C		0.0318482	0.0106626	0.0653934
YBR233W	PBP2	0.0662547	0.031769	0.151047	0.0443136
YBR233W-A	DAD3
YBR234C	ARC40	0.116831	0.027452	0.273477	0.198203
YBR235W		0.0953457	0.052437	0.110953
YBR236C	ABD1	0.113121	0.0421051	0.257094	0.0901185
YBR237W	PRP5	0.110178	0.092071	0.273872	0.0945742
YBR238C		0.264636	0.117735
YBR239C		0.115196	0.100626	0.0807087
YBR240C	THI2
YBR241C
YBR242W		0.149715	0.0768526	0.148964
YBR243C	ALG7	0.0372049	0.00957098	0.065711	0.0137678
YBR244W	GPX2
YBR245C	ISW1	0.094709	0.0462194	0.0631716	0.10484
YBR246W		0.046971	0.023753	0.0697057
YBR247C	ENP1	0.23522	0.145772	0.0403074	0.0381855
YBR248C	HIS7	0.225535	0.0561245	0.0926433	0.15263
YBR249C	ARO4	0.192563	0.142127	0.0537303	0.0824355
YBR250W
YBR251W	MRPS5	0.170277	0.0680455	0.227881	0.142122
YBR252W	DUT1	0.29383	0.0426374	0.438498	0.158973
YBR253W	SRB6	0.204904	0.0668571	0.382881	0.162836
YBR254C	TRS20	0.145953	0.0480889	0.280528	0.12984
YBR255C-A		0.148801	0.0576059	0.261149
YBR255W		0.102618	0.0851856	0.122944
YBR256C	RIB5	0.13878	0.0641255	0.277096	0.377858
YBR257W	POP4	0.0749823	0.0791235	0.111428	0.0448783
YBR258C	SHG1	0.13482	0.117216	0.310174	0.202811
YBR259W
YBR260C	RGD1	0.0847766	0.0291571	0.122827	0.126133
YBR261C		0.188409	0.0544694	0.332002
YBR262C		0.539039	0.0786265
YBR263W	SHM1	0.173614	0.0569444	0.17963	0.0766286
YBR264C	YPT10	0.141758	0.0459368	0.320847	0.133652
YBR265W	TSC10	0.256385	0.0486366	0.261357	0.154903
YBR266C	SLM6	0.229434	0.0662016	0.0508339
YBR267W	REI1	0.555678	0.129751	0.152153
YBR268W	MRPL37	0.225202	0.0486697	0.304176	0.230218
YBR269C		0.176494	0.0352609	0.492846
YBR270C		0.0472522	0.0185189	0.14066
YBR271W		0.0750522	0.0460651	0.0547548
YBR272C	HSM3
YBR273C	UBX7	0.116839	0.0236779	0.349604
YBR274W	CHK1	0.0424562	0.00400044
YBR275C	RIF1	0.105186	0.102736	0.068618	0.0534074
YBR276C	PPS1
YBR277C
YBR278W	DPB3	0.126392	0.0251883	0.26744	0.113066
YBR279W	PAF1	0.185065	0.0873987	0.246615
YBR280C	SAF1
YBR281C		0.0799781	0.0271756	0.0727677
YBR282W	MRPL27	0.0933646	0.0592749	0.211679	0.129337
YBR283C	SSH1	0.163225	0.0551128	0.238062	0.119768
YBR284W		0.0213255	0.0117013	0.145333
YBR285W
YBR286W	APE3	0.45567	0.0982606	1.11552	0.170783
YBR287W		0.25414	0.0831947	0.872957
YBR288C	APM3	0.0894862	0.0585372	0.0956038	0.0373887
YBR289W	SNF5	0.165377	0.0704815	0.191093	0.171933
YBR290W	BSD2	0.221301	0.0795844	0.500411	0.285289
YBR291C	CTP1	0.14516	0.117939	0.178584	0.0906831
YBR292C
YBR293W	VBA2	0.0512099	0.0340605	0.0747808
YBR294W	SUL1	0.0544149	0.0292373	0.0699865	0.0970011
YBR295W	PCA1	0.0655001	0.024091
YBR296C	PHO89
YBR296C-A
YBR297W	MAL33
YBR298C	MAL31	0.0562499	0.100656	0.0760988	0.0601595
YBR298C-A
YBR299W	MAL32	0.0233031	0.0824078
YBR300C		0.106174	0.0297735	0.148726
YBR301W	DAN3	0.0245657	0.0161781	0.0198941	0.0268914
YBR302C	COS2
YCL001W	RER1
YCL001W-A
YCL001W-B
YCL002C		0.0592924	0.0506363	0.0745375
YCL004W	PGS1	0.0698504	0.0260498	0.171223	0.073595
YCL005W	LDB16	0.0865113	0.0332405	0.131254
YCL005W-A	VMA9
YCL007C		0.194458	0.0595117	0.285578	0.0832159
YCL008C	STP22	0.108333	0.0453286	0.23395	0.0942644
YCL009C	ILV6
YCL010C	SGF29	0.255685	0.112334	0.390511	0.142379
YCL011C	GBP2	0.257677	0.0632152	0.243133	0.293333
YCL012C
YCL014W	BUD3	0.0506752	0.0244795	0.0720684	0.0458915
YCL016C	DCC1	0.0886145	0.0158284	0.117009	0.158869
YCL017C	NFS1	0.107114	0.0435694	0.140344	0.0898348
YCL018W	LEU2
YCL021W-A		0.0734462	0.0323807	0.106752
YCL022C		0.0569595	0.0107929	0.0182382
YCL023C
YCL024W	KCC4	0.0478613	0.00469795	0.0183944	0.0236455
YCL025C	AGP1	0.102155	0.299845	0.0613264	0.184893
YCL026C-A	FRM2
YCL026C-B		0.0399768		0.129318
YCL027W	FUS1
YCL028W	RNQ1	0.105803	0.0446704	0.174902
YCL029C	BIK1	0.151084	0.0362986	0.180518	0.143065
YCL030C	HIS4
YCL031C	RRP7	0.239725	0.104453	0.197154	0.197541
YCL032W	STE50
YCL033C		0.122858	0.0646752	0.383411
YCL034W	LSB5	0.145549	0.037387	0.270141	0.296498
YCL035C	GRX1	0.259291	0.0967336	0.7544	0.206889
YCL036W	GFD2
YCL037C	SRO9	0.410999	0.133626	0.132027
YCL038C	ATG22	0.0286838	0.0209283	0.04592	0.0442077
YCL039W	GID7
YCL040W	GLK1
YCL041C
YCL042W
YCL043C	PDI1	0.409989	0.105467	0.996636	0.606981
YCL044C	MGR1	0.0786141	0.0151079	0.158319
YCL045C
YCL046W		0.397554	0.0694749	0.0578459
YCL047C		0.0445772	0.00756302	0.421999
YCL048W	SPS22	0.0631403
YCL048W-A
YCL049C
YCL050C	APA1	0.228803	0.0457089	0.310131	0.17572
YCL051W	LRE1	0.166139	0.0546407
YCL052C	PBN1	0.0470513	0.011304	0.172788	0.0481482
YCL054W	SPB1	0.323573	0.248464	0.0249513	0.0911868
YCL055W	KAR4	0.138649	0.0555838	0.128737	0.0762086
YCL056C		0.109641	0.0662234	0.203264
YCL057C-A
YCL057W	PRD1	0.142956	0.0579143	0.221718	0.393445
YCL058C	FYV5
YCL058W-A
YCL059C	KRR1	0.155789	0.189915	0.0266914	0.0413761
YCL061C	MRC1	0.0791363	0.0363912	0.0638414	0.0826745
YCL063W	VAC17	0.117992	0.0742395	0.101804	0.0668765
YCL064C	CHA1
YCL065W		0.0772902	0.0486934	0.0771629
YCL066W	HMLALPHA1	0.0909326	0.119544	0.093802	0.0371829
YCL067C	HMLALPHA2
YCL068C		0.0273694	0.00917337	0.074789
YCL069W	VBA3	0.0339075	0.0135992
YCL073C		0.0165387	0.0103756	0.0254252
YCL076W
YCR001W
YCR002C	CDC10	0.121787	0.0456336	0.241776	0.123548
YCR003W	MRPL32	0.138057	0.0338256	0.275119	0.108543
YCR004C	YCP4
YCR005C	CIT2	0.981861	0.951757	2.00838	5.47219
YCR006C		0.121797	0.0613677	0.127272
YCR007C		0.0635753	0.045068	0.162148
YCR008W	SAT4	0.153587	0.0795795	0.387965	0.0550538
YCR009C	RVS161	0.220648	0.0832164	0.526163	0.318085
YCR010C	ADY2	0.0202681	0.0161102	0.0501086	0.0233929
YCR011C	ADP1
YCR012W	PGK1	1.33384	0.602246	2.05834	0.819341
YCR013C
YCR014C	POL4	0.0880141	0.0830528	0.122688	0.0393315
YCR015C		0.0835384	0.039325	0.173824
YCR016W		0.11717	0.102408	0.0725909
YCR017C	CWH43	0.106909	0.030576	0.154704	0.0841036
YCR018C	SRD1
YCR018C-A
YCR019W	MAK32	0.0368752	0.0141291	0.137468
YCR020C	PET18	0.0236757	0.0335474	0.0833457	0.0160007
YCR020C-A	MAK31	0.124039	0.0269673
YCR020W-B	HTL1
YCR021C	HSP30
YCR022C
YCR023C		0.116301	0.0709059
YCR024C	SLM5	0.054844	0.014087	0.103835
YCR024C-A	PMP1
YCR024C-B
YCR025C		0.0896053	0.0597256
YCR026C	NPP1	0.216529	0.0855007	0.247083
YCR027C	RHB1	0.120425	0.065016	0.200944	0.162541
YCR028C	FEN2	0.0350159	0.0177645	0.0435829	0.0457496
YCR028C-A	RIM1
YCR030C	SYP1
YCR031C	RPS14A	0.294145	0.0783163	0.120225	0.0793388
YCR032W	BPH1
YCR033W	SNT1	0.210097	0.140761	0.19887	0.229508
YCR034W	FEN1	0.0537947	0.0107518	0.0382029
YCR035C	RRP43	0.186112	0.0722071	0.167149	0.150497
YCR036W	RBK1	0.210678	0.0871047	0.311228	0.403745
YCR037C	PHO87	0.184777	0.0985302	0.0886374	0.130038
YCR038C	BUD5
YCR038W-A
YCR039C	MATALPHA2	0.0501808	0.0183072	0.142184	0.061473
YCR040W	MATALPHA1
YCR041W		0.0637364	0.0329753
YCR042C	TAF2	0.0380222	0.0100581	0.0492533	0.0412114
YCR043C
YCR044C	PER1
YCR045C		0.12447	0.0180746
YCR045W-A
YCR046C	IMG1	0.19526	0.048661	0.318459	0.0897925
YCR047C	BUD23	0.197766	0.115038	0.0895287	0.0427773
YCR047W-A
YCR048W	ARE1	0.105264	0.0373854	0.144971	0.0995946
YCR049C		0.0746398	0.0196328
YCR050C
YCR051W
YCR052W	RSC6	0.152115	0.0338885	0.187828	0.0808088
YCR053W	THR4	0.138191	0.0379231	0.0931862	0.110267
YCR054C	CTR86
YCR057C	PWP2
YCR059C	YIH1
YCR060W	TAH1	0.227832	0.0635518	0.367322
YCR061W		0.0459271	0.033641
YCR063W	BUD31	0.368087	0.0848051	0.165843	0.137174
YCR064C		0.18126	0.045134	0.0708762
YCR065W	HCM1	0.199551	0.0787451	0.154003	0.147633
YCR066W	RAD18	0.0635015	0.017827	0.141729	0.0402585
YCR067C	SED4	0.0461815	0.0158924	0.0671374	0.0431955
YCR068W	ATG15	0.11336	0.0329965	0.350447	0.153239
YCR069W	CPR4	0.145659	0.0696828	0.381725	0.178903
YCR071C	IMG2	0.166553	0.0303087	0.432908	0.128985
YCR072C	RSA4	0.176198	0.0475848
YCR073C	SSK22
YCR073W-A	SOL2
YCR075C	ERS1	0.076616	0.0163372	0.21431	0.0632677
YCR075W-A
YCR076C		0.0983875	0.0278509	0.370401
YCR077C	PAT1
YCR079W		0.15384	0.0219848	0.235716
YCR081C-A
YCR081W	SRB8
YCR082W	AHC2	0.1482	0.0653211	0.309363
YCR083W	TRX3	0.149847	0.0899813	0.317335	0.142365
YCR084C	TUP1	0.167296	0.0466401	0.114507	0.118812
YCR085W
YCR086W	CSM1	0.111554	0.0627562	0.110457	0.0232907
YCR087C-A
YCR087W		0.134693	0.0831823	0.0673097
YCR088W	ABP1	0.331238	0.0971158	0.512594	0.332516
YCR089W	FIG2
YCR090C
YCR091W	KIN82	0.0447208	0.0313304	0.114969	0.104638
YCR092C	MSH3
YCR093W	CDC39
YCR094W	CDC50	0.0520727	0.0412518	0.137182	0.0301933
YCR095C
YCR095W-A
YCR096C	HMRA2	0.0846882	0.0337293	0.25575	0.0667286
YCR097W	HMRA1
YCR097W-A
YCR098C	GIT1
YCR099C
YCR100C		0.0616411	0.0161924	0.0594218
YCR101C		0.0655147	0.00965974
YCR102C
YCR102W-A
YCR104W	PAU3	0.013849	0.00649631	0.0474806	0.0184626
YCR105W	ADH7
YCR106W	RDS1
YCR107W	AAD3
YCR108C
YDL001W	RMD1	0.0692076	0.0352014	0.113334	0.0302666
YDL002C	NHP10	0.336082	0.39477	0.782056	0.398232
YDL003W	MCD1	0.164172	0.0652923	0.145962	0.119064
YDL004W	ATP16	0.0685471	0.039848	0.119296	0.0544775
YDL005C	MED2	0.0710375	0.053597	0.117314	0.0356187
YDL006W	PTC1	0.133635	0.102099	0.201208	0.0574238
YDL007C-A
YDL007W	RPT2	0.143871	0.092843	0.286513	0.233044
YDL008W	APC11	0.173894	0.0367241	0.36994	0.0996401
YDL009C
YDL010W		0.086404	0.0453619	0.349204
YDL011C		0.159143	0.0411046	0.479451
YDL012C		0.175695	0.124294	0.298769
YDL013W	HEX3	0.155486	0.0973773	0.304122	0.15023
YDL014W	NOP1	0.129477	0.0483453	0.026214	0.0400618
YDL015C	TSC13	0.109365	0.0512532	0.224327	0.0607092
YDL016C		0.105727	0.0687353
YDL017W	CDC7
YDL018C	ERP3	0.0424704	0.00975051	0.129438	0.04367
YDL019C	OSH2	0.107494	0.0692481	0.471745	0.186195
YDL020C	RPN4	0.793814	0.457137	1.12612	1.3019
YDL021W	GPM2	0.0652596	0.146513	0.291991	0.119075
YDL022C-A
YDL022W	GPD1	0.610058	0.129667	18.6609	1.91382
YDL023C		0.479379	0.036584	6.66795
YDL024C	DIA3	0.0192541	0.0147665	0.163281
YDL025C		0.0846785	0.0443214	0.269649
YDL025W-A
YDL026W
YDL027C		0.0718722	0.0254822	0.24095
YDL028C	MPS1	0.107461	0.0343843	0.151158	0.0796221
YDL029W	ARP2	0.128744	0.0357474	0.214439
YDL030W	PRP9
YDL031W	DBP10
YDL032W
YDL033C	SLM3	0.54428	0.130908	0.649729
YDL034W		0.0934966	0.0229923	0.283048
YDL035C	GPR1	0.138747	0.0547819	0.300182	0.118496
YDL036C	PUS9
YDL037C	BSC1	0.55356	0.161846	0.299536	0.176658
YDL038C
YDL039C	PRM7
YDL040C	NAT1	0.158545	0.0708407	0.116021	0.0910379
YDL041W
YDL042C	SIR2	0.0725228	0.052099	0.0372215	0.0332833
YDL043C	PRP11	0.0702803	0.0318132	0.072388	0.0198277
YDL044C	MTF2	0.150649	0.0856256	0.23168	0.0979187
YDL045C	FAD1	0.0900236	0.040205	0.161639	0.105135
YDL045W-A	MRP10	0.119826	0.0342749	0.306221	0.14306
YDL046W	NPC2	0.186686	0.0832996	0.460264	0.128687
YDL047W	SIT4	0.392152	0.206549	0.422263	0.192623
YDL048C	STP4
YDL049C	KNH1	0.0800278	0.111782	0.109266	0.0176679
YDL050C
YDL051W	LHP1
YDL052C	SLC1
YDL053C	PBP4	0.124045	0.0572631	0.224398	0.0549619
YDL054C	MCH1
YDL055C	PSA1	1.01966	0.995769	0.621352	1.03273
YDL056W	MBP1	0.119096	0.0640585	0.141393	0.0949451
YDL057W		0.11169	0.0432762	0.180117
YDL058W	USO1
YDL059C	RAD59
YDL060W	TSR1	0.206501	0.105811	0.0431497	0.0538958
YDL061C	RPS29B	0.212929	0.0530441		0.210344
YDL062W		0.13888	0.245806	0.076049
YDL063C		0.130811	0.0831083	0.0515231
YDL064W	UBC9
YDL065C	PEX19	0.245671	0.157738	0.296082	0.295476
YDL066W	IDP1	0.0620717	0.033601	0.0992016	0.136981
YDL067C	COX9
YDL068W		0.0672436	0.0641525
YDL069C	CBS1	0.0509719	0.0994721
YDL070W	BDF2	0.515141	0.152647	0.555869	0.38913
YDL071C		0.153274	0.0476436	0.132256
YDL072C	YET3	0.216241	0.0331065	0.567203
YDL073W		0.0812591	0.0639484	0.0934511
YDL074C	BRE1	0.187963	0.117269	0.147817	0.185103
YDL075W	RPL31A	0.603987	0.245341	0.0999264	0.337221
YDL076C	RXT3	0.106999	0.0610888	0.236466	0.0793085
YDL077C	VAM6
YDL078C	MDH3	0.23668	0.183096	0.562964	0.384888
YDL079C	MRK1	0.0627127	0.0426163	0.128468	0.0542921
YDL080C	THI3	0.062788	0.0220603	0.310424	0.114447
YDL081C	RPP1A	0.448308	0.107956	0.119708	0.418013
YDL082W	RPL13A	0.402397	0.128368	0.121778	0.178257
YDL083C	RPS16B	0.631968	0.157522	0.179176	0.227119
YDL084W	SUB2	0.159644	0.0571465	0.212259
YDL085C-A
YDL085W	NDE2	0.0439966	0.0147457	0.122486	0.0470364
YDL086C-A
YDL086W		0.141441	0.0327448	0.301967
YDL087C	LUC7	0.125951	0.0209592	0.274579	0.118551
YDL088C	ASM4	0.281773	0.0999045	0.439726	0.307139
YDL089W		0.0386761	0.0201491	0.0769461
YDL090C	RAM1
YDL091C	UBX3	0.0705653	0.037267	0.175214
YDL092W	SRP14	0.216247	0.0745121	0.450644	0.222435
YDL093W	PMT5	0.048646	0.0174947	0.0542976	0.0477586
YDL094C		0.0359779	0.0209647	0.0552298
YDL095W	PMT1	0.233749	0.0460542	0.235763	0.27526
YDL096C	OPI6	0.264727	0.0298323	0.286338
YDL097C	RPN6	0.405253	0.0947772	0.870543	0.536926
YDL098C	SNU23	0.100729	0.0375164	0.359278	0.147935
YDL099W	BUG1	0.254189	0.230131	0.466874
YDL100C	GET3	0.299045	0.0650017	0.562324
YDL101C	DUN1	0.0948105	0.032371	0.0985264	0.24979
YDL102W	CDC2
YDL103C	QRI1	0.0964682	0.0231409	0.172263	0.0922769
YDL104C	QRI7	0.131386	0.0738282	0.223335	0.166988
YDL105W	NSE4	0.149618	0.083003	0.209395	0.16316
YDL106C	PHO2	0.0840507	0.0293712	0.245566	0.108228
YDL107W	MSS2	0.162626	0.0790796	0.29496	0.195908
YDL108W	KIN28	0.204349	0.0997674	0.424073	0.363464
YDL109C
YDL110C	TMA17	0.292079	0.413149	1.0674
YDL111C	RRP42	0.129867	0.0505224	0.142865	0.0710588
YDL112W	TRM3	0.150273	0.290791	0.100645	0.0257001
YDL113C	ATG20	0.0784685	0.0406944	0.22895	0.161562
YDL114W
YDL114W-A
YDL115C	IWR1
YDL116W	NUP84	0.104027	0.0524547	0.10453	0.0646176
YDL117W	CYK3	0.163772	0.0883845	0.132119	0.1173
YDL118W		0.0591748	0.0441046	0.234729
YDL119C		0.086441	0.0853248	0.276412
YDL120W	YFH1	0.0766135	0.0760987	0.152257	0.0652014
YDL121C		0.0734506	0.0910955	0.0602703
YDL122W	UBP1
YDL123W	SNA4	0.157584	0.151604	0.382634	0.154802
YDL124W		0.115367	0.0607146	0.514125
YDL125C	HNT1	0.363981	0.312818	1.30998	1.99716
YDL126C	CDC48	0.694267	0.240197	1.50896	1.23209
YDL127W	PCL2	0.108579	0.0481575	0.170371	0.0540334
YDL128W	VCX1	0.180651	0.0516021	0.306914	0.0945151
YDL129W		0.138518	0.0585167	1.02116
YDL130W	RPP1B	0.49513	0.0697642	0.104679	0.39734
YDL130W-A	STF1
YDL131W	LYS21
YDL132W	CDC53	0.132163	0.0785585	0.218449	0.197431
YDL133C-A	RPL41B
YDL133W
YDL134C	PPH21	0.257617	0.15927	0.428827	0.27569
YDL135C	RDI1	0.130573	0.0702481	0.352624
YDL136W	RPL35B	0.424755	0.183869	0.148119	0.251733
YDL137W	ARF2	0.277207	0.124659	0.405921	0.168038
YDL138W	RGT2
YDL139C	SCM3	0.0903955	0.0318968	0.275884	0.0728862
YDL140C	RPO21
YDL141W	BPL1	0.0780473	0.0331252	0.0815206	0.122301
YDL142C	CRD1
YDL143W	CCT4	0.240372	0.0840055	0.20964	0.203921
YDL144C		0.198618	0.0757877	0.34338
YDL145C	COP1	0.138681	0.0691428	0.141143	0.106278
YDL146W	LDB17	0.089251	0.0552897	0.215303
YDL147W	RPN5	0.423051	0.153253	0.722466	0.472147
YDL148C	NOP14	0.131008	0.123292	0.0259827	0.0316262
YDL149W	ATG9
YDL150W	RPC53	0.0954682	0.0563192	0.0484091
YDL151C	BUD30
YDL152W
YDL153C	SAS10	0.295517	0.275658	0.0297105	0.0503488
YDL154W	MSH5	0.0456418	0.028891	0.05906	0.0317805
YDL155W	CLB3	0.079057	0.0311008	0.0834803	0.0640182
YDL156W
YDL157C
YDL158C
YDL159C-B
YDL159W	STE7	0.0746644	0.0198712	0.130467
YDL159W-A
YDL160C	DHH1
YDL160C-A
YDL161W	ENT1	0.235486	0.0470779	0.530087	0.303199
YDL162C		0.0379588	0.020544
YDL163W
YDL164C	CDC9	0.105171	0.0264311	0.0755856	0.210555
YDL165W	CDC36	0.0947411	0.0260559	0.121049	0.0986953
YDL166C	FAP7	0.201103	0.173935	0.0994544	0.157869
YDL167C	NRP1	0.231161	0.0761869	0.018089	0.0814343
YDL168W	SFA1	0.170645	0.0549815	0.47862	0.147347
YDL169C	UGX2
YDL170W	UGA3
YDL171C	GLT1	0.193696	0.123383	0.11017	0.0670795
YDL172C		0.13375	0.0482723	0.307853
YDL173W		0.181001	0.0360632	0.45728
YDL174C	DLD1	0.167704	0.100149	0.665948	0.419773
YDL175C	AIR2	0.17831	0.0862624	0.249682	0.408549
YDL176W		0.0679259	0.0365258	0.0840449
YDL177C		0.0850197	0.126246	0.17836
YDL178W	DLD2	0.148527	0.0577251	0.252149	0.280241
YDL179W	PCL9	0.1828	0.0995563	0.205301	0.101718
YDL180W		0.0468469	0.0296664	0.0772936
YDL181W	INH1	0.122834	0.0943026	0.3369	0.48496
YDL182W	LYS20	0.344482	0.1818	0.385807	0.935111
YDL183C		0.0412867	0.036071	0.130942
YDL184C	RPL41A
YDL185C-A
YDL185W	TFP1	0.263223	0.138524	0.30099	0.137205
YDL186W		0.175504	0.0242621
YDL187C		0.129619	0.0193802	0.215162
YDL188C	PPH22	0.178444	0.114774	0.301294	0.187471
YDL189W	RBS1
YDL190C	UFD2	0.0659789	0.0411743	0.109142	0.0647189
YDL191W	RPL35A	0.538393	0.255635	0.199223	0.20215
YDL192W	ARF1	0.345301	0.090265	0.375971	0.172108
YDL193W	NUS1	0.118875	0.0462898	0.247231
YDL194W	SNF3	0.0271231	0.0310211	0.0474465	0.0239023
YDL195W	SEC31	0.142059	0.0681388	0.202601	0.135705
YDL196W
YDL197C	ASF2
YDL198C	GGC1
YDL199C		0.0208434	0.00838222	0.0582357
YDL200C	MGT1
YDL201W	TRM8	0.0949468	0.0831305	0.0598807
YDL202W	MRPL11	0.103826	0.0272282	0.133429	0.0572365
YDL203C		0.096677	0.0329923	0.142437
YDL204W	RTN2	0.0617112	0.0752197	0.793571	0.0504936
YDL205C	HEM3	0.163033	0.182249	0.213748	0.0600853
YDL206W		0.023049	0.0216527	0.116515
YDL207W	GLE1	0.147336	0.0692934	0.378603	0.170281
YDL208W	NHP2	0.465051	0.356516	0.203745	0.147208
YDL209C	CWC2	0.256619	0.101253	0.329266
YDL210W	UGA4	0.0441765	0.0242311	0.129403	0.0582346
YDL211C		0.087146	0.0370383	0.136011
YDL212W	SHR3
YDL213C	NOP6	0.166804	0.141701	0.129914	0.0501325
YDL214C	PRR2
YDL215C	GDH2	0.13472	0.0793854
YDL216C	RRI1	0.10716	0.0370317	0.211156	0.124775
YDL217C	TIM22	0.104669	0.0414219	0.15035	0.0816905
YDL218W		0.0349113	0.0315106	0.0585271
YDL219W	DTD1	0.0630799	0.0315027	0.206657	0.0296875
YDL220C	CDC13	0.0801612	0.0311574	0.263347	0.0759765
YDL221W		0.145264	0.0380537	0.410379
YDL222C	FMP45	0.0290566	0.0203238	2.53375
YDL223C	HBT1	0.101691	0.0744957	3.81222	0.120526
YDL224C	WHI4	0.128234	0.0405255	0.21811	0.142253
YDL225W	SHS1	0.113725	0.0378755	0.183987	0.102261
YDL226C	GCS1	0.284716	0.0726929	0.431794	0.284697
YDL227C	HO
YDL228C
YDL229W	SSB1	0.222806	0.0790771	0.0687634	0.23734
YDL230W	PTP1	0.179734	0.0674001	0.358676	0.226085
YDL231C	BRE4	0.119758	0.0783244	0.128821	0.0905468
YDL232W	OST4
YDL233W		0.0582828	0.0168869	0.151746
YDL234C	GYP7
YDL235C	YPD1	0.119927	0.0869628	0.173797	0.0794086
YDL236W	PHO13	0.160605	0.0580538	0.265986	0.0871272
YDL237W		0.127502	0.0392804	0.287117
YDL238C	GUD1	0.0857656	0.0251038	0.192847
YDL239C	ADY3	0.0397119	0.0291824	0.0788362	0.0830682
YDL240C-A
YDL240W	LRG1
YDL241W		0.242918	0.0360785	0.114593
YDL242W		0.0541271	0.0214386	0.0340829
YDL243C	AAD4	0.137755	0.0581162	0.178035	0.267653
YDL244W	THI13	0.0502393	0.0302637	0.088471	0.113653
YDL245C	HXT15	0.0192243	0.00877342	0.0165592	0.0276716
YDL246C	SOR2	0.0620613	0.0374994	0.0999085	0.377982
YDL247W	MPH2	0.0356392	0.0281807	0.0533941	0.0363773
YDL247W-A
YDL248W	COS7
YDR001C	NTH1
YDR002W	YRB1	0.498028	0.254299	0.576089	0.510556
YDR003W	RCR2	0.117863	0.0171248	0.404272
YDR003W-A
YDR004W	RAD57	0.0962377	0.030393	0.138751	0.0672568
YDR005C	MAF1	0.159412	0.0487195	0.339607
YDR006C	SOK1	0.165772	0.0868805	0.233055	0.0949432
YDR007W	TRP1	0.0724038	0.0587583	0.120352	0.0988779
YDR008C		0.124987	0.106979	0.179722
YDR009W	GAL3	0.0443255	0.0549531	0.0876864
YDR010C		0.0400106	0.184032
YDR011W	SNQ2
YDR012W	RPL4B
YDR013W	PSF1
YDR014W	RAD61
YDR014W-A	HED1
YDR015C		0.0214479	0.0130281	0.0399161
YDR016C	DAD1
YDR017C	KCS1	0.22755	0.180768	0.141397	0.064275
YDR018C		0.0792828	0.0622649	0.168468
YDR019C	GCV1	0.141915	0.0314224	0.251922	0.161449
YDR020C		0.114067	0.0656243	0.0850688
YDR021W	FAL1	0.112757	0.0752784	0.0822383	0.0305362
YDR022C	CIS1	0.0641612	0.0222623	0.123739	0.034251
YDR023W	SES1	0.268595	0.0703804	0.114071	0.0796873
YDR024W	FYV1
YDR025W	RPS11A	0.327761	0.141473	0.091748	0.155877
YDR026C		0.17799	0.130249	0.221529
YDR027C	VPS54	0.0683511	0.0343647	0.124669	0.0470354
YDR028C	REG1
YDR029W
YDR030C	RAD28
YDR031W
YDR032C	PST2	0.0785435	0.0499532	0.214927	0.137187
YDR033W	MRH1	0.527788	0.46751	0.180182	0.0650426
YDR034C	LYS14	0.111896	0.0865038	0.111311	0.0841679
YDR034C-A
YDR034W-B
YDR035W	ARO3	0.227957	0.150495	0.360498	0.597173
YDR036C	EHD3
YDR037W	KRS1	0.516074	0.188659	0.366046	0.357601
YDR038C	ENA5
YDR039C	ENA2	0.090107	0.0222581	0.788656	0.17956
YDR040C	ENA1
YDR041W	RSM10	0.114171	0.0276593	0.365993	0.390635
YDR042C
YDR043C	NRG1	0.147354	0.051775	0.676825	0.107222
YDR044W	HEM13	0.301131	0.0800484	0.38434	0.232522
YDR045C	RPC11	0.210202	0.113831	0.332396	0.126141
YDR046C	BAP3	0.31398	0.242934	0.212689	0.921354
YDR047W	HEM12	0.41841	0.142922	0.502454	0.408936
YDR048C
YDR049W		0.102236	0.0415027	0.123825
YDR050C	TPI1	0.86236	0.399834	1.10281	0.890003
YDR051C		0.239365	0.11701	0.587968
YDR052C	DBF4
YDR053W		0.0777669	0.0375933	0.107273
YDR054C	CDC34	0.22071	0.0684135	0.373434	0.11251
YDR055W	PST1	0.152433	0.623187	0.175297
YDR056C		0.139358	0.150984	0.319485
YDR057W	YOS9	0.0740328	0.0801097	0.154051	0.0440247
YDR058C	TGL2	0.0261734	0.0395115
YDR059C	UBC5	0.053332	0.0278399	0.269283	0.105949
YDR060W	MAK21
YDR061W		0.211981	0.0672289	0.261594
YDR062W	LCB2	0.169185	0.0717232	0.224422	0.131196
YDR063W		0.138683	0.0881688	0.326815
YDR064W	RPS13	2.12463	0.469095	0.576469	1.47658
YDR065W		0.190994	0.0982579	0.314976
YDR066C
YDR067C		0.0859249	0.0328839	0.299992
YDR068W	DOS2	0.151629	0.0886877	0.282784	0.145507
YDR069C	DOA4	0.0675754	0.0303476	0.283697	0.0766886
YDR070C
YDR071C	PAA1	0.160666	0.0394279	0.597299	0.096133
YDR072C	IPT1	0.248621	0.157856	0.501434	0.998759
YDR073W	SNF11	0.318823	0.161962	0.518879	0.354814
YDR074W	TPS2	0.135373	0.0612933	2.0785	0.200418
YDR075W	PPH3	0.0655473	0.132694	0.0719631	0.0256061
YDR076W	RAD55	0.0783722	0.116866	0.11229	0.0481575
YDR077W	SED1	0.678857	0.513486	1.522	1.14426
YDR078C	SHU2	0.0826857	0.138667	0.406344	0.107269
YDR079C-A	TFB5
YDR079W	PET100	0.131028	0.0740149	0.415049	0.103586
YDR080W	VPS41
YDR081C	PDC2	0.105523	0.052841	0.127139	0.0530931
YDR082W	STN1	0.0642137	0.0195844	0.0979875	0.0961294
YDR083W	RRP8	0.191733	0.173586	0.123522	0.086315
YDR084C	TVP23	0.045948	0.0152152	0.13143
YDR085C	AFR1	0.0540104	0.088593	0.351244	0.065463
YDR086C	SSS1	0.18619	0.109555	0.341105	0.201323
YDR087C	RRP1	0.210174	0.24332	0.121082	0.0341031
YDR088C	SLU7	0.183363	0.145163	0.45791	0.172797
YDR089W		0.0575802	0.0244125	0.0522992
YDR090C		0.0907448	0.0420276	0.171555
YDR091C	RLI1	0.177234	0.0791967	0.0694753	0.0428459
YDR092W	UBC13	0.279374	0.0828634	0.573318	0.606649
YDR093W	DNF2	0.0780067	0.0582019	0.214942	0.0565343
YDR094W		0.200572	0.168046	0.533893
YDR095C
YDR096W	GIS1	0.065564	0.0482794	0.320235	0.10931
YDR097C	MSH6	0.0905815	0.0255252	0.0570627	0.0400916
YDR098C	GRX3	0.0826411	0.0314441	0.132869	0.0835112
YDR099W	BMH2	0.116111	0.100945	0.24483	0.118199
YDR100W	TVP15	0.0756482	0.0341898	0.137048
YDR101C	ARX1	0.181228	0.077752	0.11978
YDR102C
YDR103W	STE5
YDR104C	SPO71	0.0515738	0.0300864	0.0763656	0.0557254
YDR105C	TMS1	0.0723868	0.0271115	0.176319
YDR106W	ARP10	0.052326	0.04222	0.217022	0.0395725
YDR107C		0.0419463	0.0179997	0.0497779
YDR108W	GSG1	0.0600625	0.0221591	0.064484	0.0553325
YDR109C
YDR110W	FOB1	0.169433	0.0422038	0.619867	0.108443
YDR111C		0.08699	0.0240237	0.181078
YDR112W		0.0785608	0.0642596	0.295126
YDR113C	PDS1	0.139338	0.0325466	0.236175	0.0813234
YDR114C
YDR115W		0.17666	0.0258684	0.314826
YDR116C	MRPL1	0.13555	0.040123	0.289621	0.0722916
YDR117C	TMA64	0.0630267	0.0381281	0.0963565
YDR118W	APC4	0.0798933	0.0335257	0.102864	0.0500868
YDR118W-A
YDR119W		0.147502	0.0601931	0.173364
YDR119W-A
YDR120C	TRM1	0.12631	0.106563	0.0310965	0.021651
YDR121W	DPB4	0.139392	0.0468786	0.177423	0.0939175
YDR122W	KIN1	0.0926914	0.0479841	0.201801	0.212528
YDR123C	INO2
YDR124W		0.0431423	0.0331634	0.0738301
YDR125C	ECM18	0.0456485	0.0282927	0.136738	0.0329187
YDR126W	SWF1	0.172913	0.0826228	0.233015
YDR127W	ARO1	0.125548	0.0840375	0.0629221	0.111043
YDR128W		0.123357	0.098312	0.0978341
YDR129C	SAC6	0.219238	0.0975863	0.571041	0.318574
YDR130C	FIN1	0.1039	0.0330677	0.239438	0.0448816
YDR131C		0.0265216	0.018099	0.0486531
YDR132C		0.110662	0.0548964	0.253271
YDR133C		0.41877	0.797316	0.326288
YDR135C	YCF1
YDR136C	VPS61
YDR137W	RGP1	0.0905514	0.0453892	0.167188	0.0591267
YDR138W	HPR1
YDR139C	RUB1
YDR140W	MTQ2	0.107318	0.0507444	0.135476	0.0829373
YDR141C	DOP1
YDR142C	PEX7	0.158135	0.0713867	0.291095	0.132394
YDR143C	SAN1	0.197383	0.0918968	0.208343	0.0840735
YDR144C	MKC7	0.0995469	0.0381982	0.0808713	0.0592556
YDR145W	TAF12	0.318419	0.0879524	0.365719
YDR146C	SWI5	0.0863067	0.029796	0.0471336	0.0721899
YDR147W	EKI1
YDR148C	KGD2	0.0932539	0.0890865	0.207122	0.090242
YDR149C		0.0692584	0.0298965	0.131312
YDR150W	NUM1	0.133784	0.137805	0.243938	0.108319
YDR151C	CTH1	0.233927	0.0407943	0.572516	0.282268
YDR152W	GIR2	0.309375	0.158748	0.331671	0.136517
YDR153C	ENT5	0.327404	0.194943	0.543993	0.171377
YDR154C		0.448947	0.127714	1.70321
YDR155C	CPR1	0.221523	0.0658237	0.347305	0.185842
YDR156W	RPA14	0.504777	0.159112	0.465374	0.215001
YDR157W		0.194234	0.180381	0.202073
YDR158W	HOM2	0.340771	0.0945031	0.404789	0.744136
YDR159W	SAC3
YDR160W	SSY1	0.0569092	0.0474424	0.0863607	0.0377493
YDR161W		0.26674	0.124591	0.178816	0.0835199
YDR162C	NBP2	0.0815208	0.0568913	0.209812	0.0750562
YDR163W	CWC15	0.121715	0.109566	0.263115
YDR164C	SEC1	0.0678829	0.025021	0.0891499	0.0872062
YDR165W	TRM82
YDR166C	SEC5	0.0774036	0.0675746	0.126129	0.041231
YDR167W	TAF10	0.157779	0.0355852	0.226308
YDR168W	CDC37	0.178976	0.0718729	0.318059	0.250636
YDR169C	STB3	0.164637	0.0553978	0.219803	0.410501
YDR169C-A
YDR170C	SEC7	0.13054	0.247953	0.184178	0.0975625
YDR171W	HSP42
YDR172W	SUP35	0.440649	0.13735	0.218679	0.302011
YDR173C	ARG82	0.227311	0.0598521	0.381866	0.324468
YDR174W	HMO1	0.397072	0.105422	0.372268	0.279988
YDR175C	RSM24	0.173373	0.0609153	0.302876	0.137934
YDR176W	NGG1	0.19464	0.122742	0.187105	0.271242
YDR177W	UBC1	0.109137	0.12814	0.143589	0.169888
YDR178W	SDH4	0.041493	0.0345109	0.183963
YDR179C	CSN9	0.0381658	0.0428802	0.0461845
YDR179W-A
YDR180W	SCC2
YDR181C	SAS4	0.0954493	0.0705844	0.147392	0.0753502
YDR182W	CDC1	0.15786	0.0649958	0.293796	0.161939
YDR182W-A
YDR183C-A
YDR183W	PLP1	0.093911	0.0467153	0.269725	0.0804086
YDR184C	ATC1
YDR185C		0.192025	0.0653796	0.371349
YDR186C
YDR187C		0.646768	0.120107	0.74303
YDR188W	CCT6	0.439253	0.0872296	0.439209	0.46859
YDR189W	SLY1	0.118164	0.0595833	0.115103	0.0635156
YDR190C	RVB1	0.300264	0.120498	0.150647	0.0987382
YDR191W	HST4	0.077131	0.0323626	0.145501	0.0653419
YDR192C	NUP42	0.138811	0.0393714	0.201985	0.0826334
YDR193W		0.0846316	0.0537826	0.131589
YDR194C	MSS116	0.197709	0.0728799	0.224412	0.076907
YDR194W-A
YDR195W	REF2
YDR196C		0.160244	0.0722199	0.511453
YDR197W	CBS2	0.0995112	0.0358391	0.254119	0.0599934
YDR198C		0.0730147	0.0397025	0.0771662
YDR199W
YDR200C	VPS64	0.0683543	0.0302938	0.153397	0.0608616
YDR201W	SPC19	0.0718657	0.0283389	0.210972	0.0550798
YDR202C	RAV2	0.185064	0.046214	0.472372	0.415322
YDR203W		0.0883418	0.0187562	0.569997
YDR204W	COQ4	0.208588	0.0462054	0.662951	0.403996
YDR205W	MSC2
YDR206W	EBS1	0.0952213	0.0643168	0.0796672	0.0295391
YDR207C	UME6	0.0896376	0.0256557	0.150086	0.0692251
YDR208W	MSS4	0.192434	0.0590561	0.224484	0.208674
YDR209C		0.267757	0.197649	0.36566
YDR210W		0.462922	0.0964832	0.79144
YDR211W	GCD6	0.20212	0.130038	0.106682	0.121184
YDR212W	TCP1	0.152534	0.0614232	0.144059	0.150981
YDR213W	UPC2
YDR214W	AHA1	0.516085	0.120461	0.730963
YDR215C
YDR216W	ADR1	0.0342095	0.153486	0.12902	0.197748
YDR217C	RAD9	0.0716688	0.0440993	0.0682901	0.0468156
YDR218C	SPR28	0.0170441	0.00684454	0.0257655
YDR219C	MFB1
YDR220C
YDR221W	GTB1	0.118396	0.0285421	0.182184
YDR222W		0.0607098	0.0319782	0.183996
YDR223W	CRF1	0.052883	0.0294567	0.130407
YDR224C	HTB1	0.927875	0.347114	1.45748	0.50159
YDR225W	HTA1	1.09803	0.432305	1.60449	0.62564
YDR226W	ADK1	0.361184	0.0577823	0.464506	0.368012
YDR227W	SIR4	0.106596	0.0587407	0.0996149	0.05655
YDR228C	PCF11
YDR229W	IVY1	0.182273	0.277842	0.413666	0.15557
YDR230W		0.0712857	0.0340279
YDR231C	COX20	0.0584942	0.0174887	0.145218	0.235909
YDR232W	HEM1	0.324483	0.0909341	0.351268	0.241197
YDR233C	RTN1	0.284605	0.182156	0.288968	0.149939
YDR234W	LYS4	0.135868	0.0416968	0.0442788	0.0777108
YDR235W	PRP42
YDR236C	FMN1	0.0667022	0.0388286
YDR237W	MRPL7	0.0827439	0.0288217	0.214577	0.0681783
YDR238C	SEC26
YDR239C
YDR240C	SNU56
YDR241W	BUD26
YDR242W	AMD2	0.120544	0.0660847	0.159297	0.108595
YDR243C	PRP28	0.0976691	0.0585778	0.14394
YDR244W	PEX5
YDR245W	MNN10
YDR246W	TRS23
YDR246W-A
YDR247W	VHS1
YDR248C		0.119315	0.0638692	0.5943
YDR249C		0.122069	0.0576969	0.438642
YDR250C
YDR251W	PAM1	0.126605	0.0704126	0.439206	0.223349
YDR252W	BTT1
YDR253C	MET32	0.0852575	0.150704	0.135603	0.0960238
YDR254W	CHL4	0.0716707	0.0806014	0.168015
YDR255C	RMD5	0.0700068	0.0526335	0.219952	0.126102
YDR256C	CTA1	0.0942052	0.0287033	0.0788899	0.135044
YDR257C	SET7	0.193858	0.0840781	0.19833	0.2823
YDR258C	HSP78
YDR259C	YAP6
YDR260C	SWM1	0.174424	0.0432529	0.197769	0.150348
YDR261C	EXG2	0.130842	0.0491708	0.231529	0.113742
YDR262W		0.110116	0.0579141	0.292191
YDR263C	DIN7
YDR264C	AKR1	0.354825	0.143853	0.48421	0.845876
YDR265W	PEX10	0.186458	0.0750768	0.23281	0.294236
YDR266C		0.122969	0.0545237	0.104594
YDR267C	CIA1	0.198909	0.100649	0.293946
YDR268W	MSW1	0.125854	0.0548975	0.265502	0.189137
YDR269C
YDR270W	CCC2
YDR271C		0.153698	0.0701559	0.257516
YDR272W	GLO2	0.1278	0.0877878	0.428003	0.110133
YDR273W	DON1	0.0879241	0.058096	0.14868	0.0823133
YDR274C		0.524001	0.726116	0.655835
YDR275W	BSC2	0.360824	0.219109	0.290259
YDR276C	PMP3
YDR277C	MTH1	0.223943	0.0671781	0.274563	0.164779
YDR278C
YDR279W	RNH202	0.148372	0.0769302	0.202948
YDR280W	RRP45	0.188423	0.136634	0.190298	0.0562519
YDR281C	PHM6	0.178005	0.0625883	0.0663965	0.138471
YDR282C		0.0389898	0.0188633	0.0936855
YDR283C	GCN2
YDR284C	DPP1	0.0950363	0.0544899	0.228038	0.119324
YDR285W	ZIP1
YDR286C
YDR287W		0.0374425	0.0323252	0.127153
YDR288W	NSE3	0.156547	0.0939762	0.355511
YDR289C	RTT103	0.176841	0.0831436	0.397718	0.115232
YDR290W
YDR291W
YDR292C	SRP101	0.152825	0.0844058	0.253109	0.111879
YDR293C	SSD1	0.188313	0.105086	0.391717	0.269556
YDR294C	DPL1	0.284167	0.257435	0.40006	0.203343
YDR295C	HDA2	0.0925307	0.0856902	0.145449	0.0640171
YDR296W	MHR1
YDR297W	SUR2	0.381398	0.286028	0.36224	0.222324
YDR298C	ATP5
YDR299W	BFR2	0.321288	0.300244	0.0346338	0.113702
YDR300C	PRO1
YDR301W	CFT1	0.0863211	0.0462662	0.244228	0.103442
YDR302W	GPI11	0.0310299	0.047498	0.0663541	0.051926
YDR303C	RSC3	0.0531554	0.0287551	0.0628534	0.0357884
YDR304C	CPR5	0.128382	0.0239245	0.295066	0.155836
YDR305C	HNT2	0.113976	0.0589293	0.359201	0.082854
YDR306C		0.0617106	0.052563	0.206012
YDR307W		0.0550236	0.0332482	0.0827585
YDR308C	SRB7	0.086346	0.0512657	0.133439	0.0432175
YDR309C	GIC2	0.168571	0.0964443	0.169137	0.0947567
YDR310C	SUM1
YDR311W	TFB1	0.150519	0.0521252	0.168334	0.0864714
YDR312W	SSF2	0.132521	0.0803524	0.0494817
YDR313C	PIB1	0.114436	0.0231127	0.204161	0.0716609
YDR314C		0.0857005	0.052778	0.123554
YDR315C	IPK1	0.0398377	0.0143423
YDR316W	OMS1	0.167646	0.0918575	0.302034
YDR317W	HIM1	0.0322518	0.0207057	0.0640255
YDR318W	MCM21	0.0670758	0.084496	0.108602	0.0585776
YDR319C		0.121727	0.0829674	0.244757
YDR320C	SWA2	0.0886341	0.0337236	0.140091	0.0724078
YDR320C-A	DAD4	0.264816	0.069642	0.316795	0.22886
YDR320W-B
YDR321W	ASP1	0.139638	0.0536095	0.0977063
YDR322C-A	TIM11
YDR322W	MRPL35	0.172593	0.0695692	0.267706	0.213212
YDR323C	PEP7	0.050641	0.0402596	0.099009	0.0846474
YDR324C	UTP4	0.242134	0.0866654	0.0257399
YDR325W	YCG1	0.101241	0.0703627	0.178746	0.0592622
YDR326C	YSP2	0.185746	0.169708	0.220007
YDR327W		0.101315	0.0309793	0.271982
YDR328C	SKP1	0.196132	0.0565879	0.569146	0.230666
YDR329C	PEX3	0.0617288	0.0257586	0.14838	0.0663667
YDR330W	UBX5	0.082099	0.0310502	0.278391
YDR331W	GPI8	0.0642734	0.0244401	0.110785
YDR332W		0.0640642	0.0331186	0.113807
YDR333C		0.102531	0.0408242	0.134413
YDR334W	SWR1	0.211933	0.120547	0.326605	0.179921
YDR335W	MSN5	0.19442	0.0974299	0.169162	0.436022
YDR336W		0.0899744	0.0663399	0.210909
YDR337W	MRPS28	0.207989	0.0548932	0.450436	0.13477
YDR338C		0.0668208	0.0296019	0.142327
YDR339C	FCF1	0.148078	0.123801	0.157804
YDR340W
YDR341C		0.30785	0.150863	0.115974
YDR342C	HXT7	0.0484863	0.0813185	0.0794507	0.064077
YDR343C	HXT6
YDR344C		0.0816804	0.0901316	0.0618336
YDR345C	HXT3	0.308508	0.039849	0.0371477	0.139643
YDR346C	SVF1	0.263367	0.255131	0.143392	0.0855941
YDR347W	MRP1	0.12044	0.0445113	0.196661	0.0764678
YDR348C		0.258648	0.0664251	0.215685
YDR349C	YPS7	0.129109	0.0704535	0.10277	0.0825564
YDR350C	TCM10	0.0971243	0.0530605	0.193192	0.10966
YDR351W	SBE2	0.138136	0.0864627	0.15759	0.0904461
YDR352W		0.235481	0.0808293	0.285336
YDR353W	TRR1	0.280568	0.121272	0.354518	0.499958
YDR354C-A
YDR354W	TRP4	0.102058	0.0713223	0.106521	0.138083
YDR355C
YDR356W	SPC110
YDR357C
YDR358W	GGA1	0.12014	0.0327614	0.816858	0.27116
YDR359C	VID21	0.125582	0.05646	0.102289	0.0664346
YDR360W	OPI7	0.0757808	0.0408897	0.0305086
YDR361C	BCP1	0.138484	0.119744	0.121462	0.0541624
YDR362C	TFC6	0.0923308	0.0559757	0.112219	0.0534639
YDR363W	ESC2
YDR363W-A	SEM1
YDR364C	CDC40
YDR365C	ESF1
YDR366C		0.0223528	0.0339107	0.0533554
YDR367W		0.0415374	0.0141862	0.150596
YDR368W	YPR1
YDR369C	XRS2	0.0423895	0.0384878	0.133967	0.04462
YDR370C
YDR371C-A
YDR371W	CTS2	0.0887356	0.0570295	0.158846	0.174402
YDR372C	VPS74	0.225044	0.153261	0.43213
YDR373W	FRQ1	0.138045	0.0452405	0.324476	0.113688
YDR374C
YDR374W-A
YDR375C	BCS1	0.0836306	0.0287013	0.195325	0.0515516
YDR376W	ARH1
YDR377W	ATP17
YDR378C	LSM6	0.178413	0.0795423	0.387892	0.132339
YDR379C-A
YDR379W	RGA2
YDR380W	ARO10
YDR381C-A		0.108282	0.123407	0.218907
YDR381W	YRA1
YDR382W	RPP2B	1.12418	0.265847	0.206841	0.528116
YDR383C	NKP1	0.110615	0.0748659	0.216885	0.0587522
YDR384C	ATO3	0.0747965	0.0426729	0.0266443	0.0172121
YDR385W	EFT2	0.299711	0.10851	0.115764	0.100996
YDR386W	MUS81	0.0675945	0.0584746	0.108422	0.0594505
YDR387C		0.0684719	0.0333784	0.15722
YDR388W	RVS167	0.210438	0.0604099	0.534609	0.235763
YDR389W	SAC7	0.154673	0.0820228	0.191671	0.10931
YDR390C	UBA2	0.0908521	0.0496541	0.106464	0.0497808
YDR391C		0.169217	0.0331552	1.06069
YDR392W	SPT3	0.223015	0.0990307	0.529296	0.272264
YDR393W	SHE9
YDR394W	RPT3	0.234915	0.160633	0.331323	0.121661
YDR395W	SXM1	0.18384	0.0672717	0.0839205	0.0601921
YDR396W		0.353371	0.145942	0.28437
YDR397C	NCB2	0.69076	0.312586	0.409681	0.334183
YDR398W	UTP5	0.297584	0.117165	0.0355913	0.0562615
YDR399W	HPT1	0.424952	0.204512	0.0868567	0.0950396
YDR400W	URH1	0.132502	0.0315571	0.151881	0.0701395
YDR401W		0.0208899	0.0103996
YDR402C	DIT2
YDR403W	DIT1
YDR404C	RPB7
YDR405W	MRP20	0.103121	0.0961581	0.21269	0.0998464
YDR406W	PDR15	0.04129	0.0300509
YDR406W-A
YDR407C	TRS120	0.0463431	0.0648353	0.0659527	0.0637483
YDR408C	ADE8	0.245069	0.0312272	0.40162	0.581074
YDR409W	SIZ1	0.0776756	0.0214171	0.146704	0.076702
YDR410C	STE14	0.109217	0.0286738	0.162824	0.087512
YDR411C	DFM1	0.305508	0.103476	0.397255
YDR412W		0.172223	0.136605	0.0931983
YDR413C		0.086177	0.0810071	0.060721
YDR414C	ERD1	0.089505	0.0520402	0.161751
YDR415C		0.240739	0.0583501	0.593235
YDR416W	SYF1	0.145872	0.0492354	0.134693	0.0871461
YDR417C		0.521779	0.0667808	0.174731
YDR418W	RPL12B	0.378894	0.0611035	0.143508	0.195413
YDR419W	RAD30	0.0583196	0.0266965	0.100845	0.039999
YDR420W	HKR1	0.142755	0.0737791	0.0909284	0.0674708
YDR421W	ARO80	0.0865814	0.0354443	0.156617	0.0831825
YDR422C	SIP1	0.110717	0.0453958	0.172614	0.0831124
YDR423C	CAD1	0.178972	0.0895016	0.337628	0.241324
YDR424C	DYN2	0.204023	0.187392	0.354679	0.194171
YDR425W	SNX41
YDR426C
YDR427W	RPN9	0.182572	0.0609654	0.252171	0.202844
YDR428C		0.0838772	0.0892495	0.136615
YDR429C	TIF35	0.433171	0.262986	0.289684	0.184548
YDR430C	CYM1
YDR431W
YDR432W	NPL3	0.325724	0.123462	0.422009
YDR433W		0.670621	0.300579	0.6535	0.402695
YDR434W	GPI17	0.0510129	0.0260236	0.11729
YDR435C	PPM1	0.122052	0.0362253	0.371866	0.342422
YDR436W	PPZ2	0.0999456	0.0561732	0.272615	0.368879
YDR437W	GPI19	0.161967	0.063909	0.27643
YDR438W		0.136971	0.0752266	0.187681
YDR439W	LRS4	0.134491	0.0574867	0.22609
YDR440W	DOT1	0.0677529	0.0476224	0.052128	0.044598
YDR441C	APT2	0.314212	0.121508	0.111266	0.0736564
YDR442W		0.140709	0.19855	0.122004
YDR443C	SSN2
YDR444W		0.119323	0.05387	0.0753374
YDR445C
YDR446W	ECM11
YDR447C	RPS17B	0.441285	0.171624	0.0382235	0.272143
YDR448W	ADA2	0.206341		0.229293
YDR449C	UTP6
YDR450W	RPS18A	0.285557	0.0825842	0.0630995	0.123935
YDR451C	YHP1	0.401949	0.176112	0.344616	0.317954
YDR452W	PPN1	0.0950157	0.0330441	0.193923	0.0994635
YDR453C	TSA2
YDR454C	GUK1
YDR455C		0.146319	0.0488566	0.303438
YDR456W	NHX1
YDR457W	TOM1	0.0814036	0.102744	0.0808767	0.0512629
YDR458C		0.11869	0.0834985	0.211699
YDR459C	PFA5	0.136992	0.0295482	0.284353
YDR460W	TFB3	0.164978	0.07204	0.326762	0.109715
YDR461C-A
YDR461W	MFA1
YDR462W	MRPL28	0.185082	0.129996	0.296235	0.119422
YDR463W	STP1	0.127304	0.0390381	0.197416	0.11445
YDR464C-A
YDR464W	SPP41
YDR465C	RMT2
YDR466W	PKH3
YDR467C
YDR468C	TLG1	0.187395	0.150404	0.339894	0.332441
YDR469W	SDC1	0.109712	0.0751393	0.14119	0.0733496
YDR470C	UGO1	0.0532168	0.0172761	0.10837	0.0813402
YDR471W	RPL27B	0.629129	0.153408	0.100203	0.324213
YDR472W	TRS31
YDR473C	PRP3	0.112835	0.112705	0.212179	0.0491799
YDR475C		0.248077	0.192195	0.495168	0.151226
YDR476C		0.242246	0.0657964	0.600418
YDR477W	SNF1	0.136038	0.0556372	0.224697	0.0762325
YDR478W	SNM1	0.0970146	0.0528954	0.113655	0.0720232
YDR479C	PEX29	0.120867	0.040013	0.316826
YDR480W	DIG2	0.0810538	0.0238255	0.152512	0.05617
YDR481C	PHO8	0.351667	0.0819733	0.387808	0.453556
YDR482C	CWC21	0.262658	0.187862	0.305323
YDR483W	KRE2	0.120218	0.0224796	0.159986	0.12838
YDR484W	VPS52	0.0691144	0.0385802	0.127689	0.0556061
YDR485C	VPS72	0.15223	0.123166	0.215995	0.112451
YDR486C	VPS60	0.121468	0.0463011	0.288532	0.202781
YDR487C	RIB3	0.299219	0.0958169	0.312084	1.42794
YDR488C	PAC11	0.189838	0.0541116
YDR489W	SLD5	0.0715604	0.0334286	0.101654
YDR490C	PKH1	0.0649553	0.0242694	0.13322	0.0454472
YDR491C		0.105699	0.15593	0.0655035
YDR492W	IZH1	0.126079	0.157933	0.0697057
YDR493W		0.186204	0.0815099	0.371238
YDR494W	RSM28	0.127242	0.0359794	0.228806	0.0815397
YDR495C	VPS3
YDR496C	PUF6	0.230004	0.165843	0.0512843	0.0394159
YDR497C	ITR1	0.159768	0.0415924	0.113192	0.158049
YDR498C	SEC20	0.137315	0.0585133	0.222537	0.176596
YDR499W	LCD1	0.057082	0.0721029	0.054163	0.065825
YDR500C	RPL37B	0.693466	0.267353	0.246949	0.557224
YDR501W	PLM2	0.0528519	0.0167482	0.0657711	0.151793
YDR502C	SAM2	0.107167	0.0454167	0.0734151	0.216965
YDR503C	LPP1
YDR504C	SPG3
YDR505C	PSP1	0.0650038	0.0314722	0.0972685	0.0568758
YDR506C		0.0905404	0.0431156	0.156097
YDR507C	GIN4	0.17361	0.190412	0.0970656	0.224467
YDR508C	GNP1	0.188058	0.208119	0.230655	0.0793172
YDR509W		0.372942	0.231954	0.772662
YDR510C-A
YDR510W	SMT3
YDR511W	ACN9	0.171441	0.117518	0.483716	0.20469
YDR512C	EMI1	0.0799504	0.0301345	0.210845	0.0926272
YDR513W	GRX2
YDR514C		0.12221	0.0757608	0.23021
YDR515W	SLF1	0.0588919	0.0379521	0.0975975	0.0694245
YDR516C	EMI2	0.156316	0.0983309	0.9887	1.41765
YDR517W	GRH1	0.202264	0.0522187	0.355652	0.568144
YDR518W	EUG1	0.0428909	0.0192038	0.0838277	0.0860477
YDR519W	FPR2	0.120582	0.0587463	0.186318	0.0893331
YDR520C		0.0692485	0.0399712	0.0877699
YDR521W		0.0722977	0.0252083	0.114447
YDR522C	SPS2	0.134881	0.0734591	0.05914	0.153499
YDR523C	SPS1	0.0222799	0.0183495	0.0306364	0.0194073
YDR524C	AGE1	0.0701254	0.0312143	0.07722
YDR524C-A
YDR524C-B
YDR524W-C
YDR525W	API2
YDR525W-A	SNA2
YDR526C		0.187513	0.18604	0.229845
YDR527W	RBA50	0.0958746	0.0648425	0.078547
YDR528W	HLR1	0.0553688	0.0243315	0.0463522	0.0550226
YDR529C	QCR7	0.11351	0.0535694	0.244825	0.175239
YDR530C	APA2	0.0864509	0.078374	0.239733	0.127196
YDR531W		0.164386	0.0690801	0.36901
YDR532C		0.143389	0.0582836	0.364568	0.158243
YDR533C	HSP31	0.0627047	0.0352188	0.408673
YDR534C	FIT1	0.0232163	0.0135756
YDR535C
YDR536W	STL1	0.041369	0.044581	2.08418	0.0335266
YDR537C
YDR538W	PAD1
YDR539W		0.0638828	0.0365791	0.113162
YDR540C		0.0538362	0.0270683	0.111075
YDR541C		0.101662	0.0463036	0.18671
YDR542W
YDR543C
YDR544C
YDR545C-A
YDR545W	YRF1-1
YEL001C		0.086304	0.012869	0.135211
YEL002C	WBP1	0.118883	0.039134	0.198944	0.0967872
YEL003W	GIM4	0.152715	0.0618902	0.201511	0.0903856
YEL004W	YEA4
YEL005C	VAB2	0.050088	0.0302136	0.167528	0.0439107
YEL006W	YEA6
YEL007W
YEL008C-A
YEL008W		0.123396	0.0250138	0.0462752
YEL009C	GCN4	1.36308	0.417411	0.452124	0.757204
YEL009C-A		0.0207391	0.00657493
YEL010W
YEL011W	GLC3
YEL012W	UBC8	0.0801468	0.304	0.48503	0.488937
YEL013W	VAC8	0.180131	0.112764	0.372852	0.0908678
YEL014C		0.25926	0.172833	0.196877
YEL015W	EDC3	0.144559	0.0585789	0.171283
YEL016C	NPP2	0.0639852	0.00432532	0.0893189
YEL017C-A	PMP2
YEL017W	GTT3	0.0724496	0.00859818		0.12065
YEL018C-A
YEL018W	EAF5	0.211875	0.241028	0.417348	0.0851469
YEL019C	MMS21	0.0385062	0.013093	0.126898	0.024363
YEL020C		0.123496	0.0589109
YEL020C-B
YEL020W-A	TIM9
YEL021W	URA3
YEL022W	GEA2
YEL023C		0.0438929	0.0261985	0.0640477
YEL024W	RIP1	0.0454719	0.0488311	0.0828125	0.103958
YEL025C		0.0911873	0.0538265	0.121495	0.107219
YEL026W	SNU13
YEL027W	CUP5	0.0876777	0.0287137	0.115295
YEL028W		0.106569	0.063881	0.189174
YEL029C	BUD16	0.0641636	0.0417821	0.108163	0.167907
YEL030C-A		0.0782959	0.018143	0.152749
YEL030W	ECM10	0.0454151	0.0131361	0.100422	0.0819283
YEL031W	SPF1
YEL032C-A
YEL032W	MCM3	0.17301	0.0866005
YEL033W		0.20172	0.0236729	0.199514
YEL034C-A		0.316552	0.209231	0.426968
YEL034W	HYP2	0.392702	0.277434	0.514054	0.333996
YEL035C	UTR5	0.495165	0.0617754	0.295646	0.338276
YEL036C	ANP1
YEL037C	RAD23
YEL038W	UTR4	0.0837927	0.0326541	0.162316	0.0588375
YEL039C	CYC7	0.0315886	0.0617993	0.419191	0.0243524
YEL040W	UTR2	0.603601	0.142876	0.256522	0.211482
YEL041W	YEF1
YEL042W	GDA1	0.115993	0.0199327	0.0565853	0.0703304
YEL043W
YEL044W	IES6	0.229006	0.0449708	0.516273	0.351132
YEL045C		0.0528639	0.0273287	0.105039
YEL046C	GLY1	1.2018	0.336423
YEL047C		0.181402	0.0495482	0.241643
YEL048C
YEL049W	PAU2	0.0195518	0.0110134	0.0168108	0.0107584
YEL050C	RML2
YEL050W-A
YEL051W	VMA8	0.229424	0.0730046	0.354431	0.162188
YEL052W	AFG1
YEL053C	MAK10	0.0617611	0.0467836	0.0488788	0.0744839
YEL053W-A
YEL054C	RPL12A
YEL055C	POL5	0.0687679	0.0790436
YEL056W	HAT2
YEL057C		0.0383523	0.0225325	0.0764084
YEL058W	PCM1	0.286717	0.078155	0.242513	0.219413
YEL059C-A	SOM1
YEL059W		0.0265686	0.0147864
YEL060C	PRB1
YEL061C	CIN8	0.094783	0.0799664	0.0754165
YEL062W	NPR2	0.106532	0.0255347
YEL063C	CAN1	0.204155	0.149214	0.15601	0.124608
YEL064C	AVT2	0.0470511	0.0160623	0.0688744
YEL065W	SIT1
YEL066W	HPA3	0.0620061	0.0434994	0.0950627	0.117688
YEL067C		0.0263516	0.0177933	0.0511934
YEL068C
YEL069C	HXT13
YEL070W	DSF1	0.00670958	0.00855814
YEL071W	DLD3	0.456888	0.483744	0.422138	1.55012
YEL072W	RMD6	0.0389954	0.0402263	0.0590762	0.0550673
YEL073C
YEL074W
YEL075C
YEL075W-A
YEL076C
YEL076C-A
YEL077C		0.127713	0.0186896	0.114328
YEL077W-A
YER001W	MNN1
YER002W	NOP16	0.326482	0.767655	0.141808	0.0951491
YER003C	PMI40	0.0982994	0.0158042	0.116725	0.067455
YER004W		0.241509	0.0389361	0.375345
YER005W	YND1	0.139067	0.0462136	0.152093	0.201794
YER006C-A
YER006W	NUG1	0.244771	0.191338	0.0537954	0.0539229
YER007C-A	TMA20	0.104621	0.0545652	0.136238
YER007W	PAC2	0.0544617	0.0423671	0.0992553	0.034896
YER008C	SEC3	0.103785	0.0937937	0.110485	0.0902582
YER009W	NTF2	0.147072	0.0523313	0.237721	0.0892914
YER010C		0.0649452	0.0218478	0.145869
YER011W	TIR1
YER012W	PRE1	0.180692	0.102079	0.379159	0.227624
YER013W	PRP22	0.0647733	0.0420532	0.0883472	0.0676474
YER014C-A	BUD25
YER014W	HEM14
YER015W	FAA2	0.0272756	0.0204559	0.0443127	0.0468188
YER016W	BIM1
YER017C	AFG3	0.133114	0.0525143	0.223225	0.210864
YER018C	SPC25	0.425988	0.0847983	0.460629	0.239575
YER019C-A	SBH2
YER019W	ISC1	0.148636	0.0376013	0.230217	0.0950014
YER020W	GPA2
YER021W	RPN3	0.256822	0.0954275	0.249913
YER022W	SRB4	0.0915738	0.046658	0.124131	0.133593
YER023C-A
YER023W	PRO3
YER024W	YAT2	0.0970213	0.0475475	0.152687	0.0733241
YER025W	GCD11	0.248907	0.108293	0.131099	0.188617
YER026C	CHO1	0.114646	0.100346	0.193339	0.168185
YER027C	GAL83	0.114623	0.0279783	0.206509	0.114038
YER028C	MIG3	0.0575215	0.0129096	0.026697	0.0353582
YER029C	SMB1	0.163366	0.102376	0.18423	0.0985556
YER030W		0.214452		0.339121
YER031C	YPT31	0.128673	0.049648	0.178366	0.0530964
YER032W	FIR1	0.0573735	0.0233044	0.0419779	0.0380193
YER033C	ZRG8
YER034W		0.137037	0.0783762	0.423609
YER035W	EDC2	1.34868	0.417412	2.65454	1.06765
YER036C	ARB1	0.620735	0.228972	0.625149	0.225327
YER037W	PHM8	0.111249	0.0610023	0.513208	0.160347
YER038C	KRE29	0.0376874	0.0204049	0.111298	0.015432
YER038W-A
YER039C	HVG1	0.102237	0.0235385
YER039C-A		0.0627037	0.0148408	0.0815147
YER040W	GLN3	0.0689963	0.0245271	0.0765837	0.202341
YER041W	YEN1
YER042W	MXR1	0.0513232	0.0750338	0.0258722	0.0667829
YER043C	SAH1	0.359717	0.138668	0.301026	0.21404
YER044C	ERG28	0.11356	0.123166	0.238302	0.106177
YER044C-A	MEI4
YER045C	ACA1
YER046W	SPO73	0.0933865	0.14236	0.135555	0.130878
YER046W-A
YER047C	SAP1	0.109885	0.0658471	0.191239	0.125492
YER048C	CAJ1	0.187227	0.0904347	0.4242	0.138005
YER048W-A	ISD11
YER049W		0.292862	0.0978044	0.178652
YER050C	RSM18	0.142968	0.0400003	0.348888	0.137702
YER051W		0.0504333	0.0117329	0.146136
YER052C	HOM3	0.199538	0.0673581	0.0683914	0.544774
YER053C	PIC2	0.0893309	0.141635	0.631944
YER053C-A
YER054C	GIP2
YER055C	HIS1	0.236491	0.135728	0.155176	0.59686
YER056C	FCY2
YER056C-A	RPL34A	0.557827	0.142353	0.194161	0.324186
YER057C	HMF1	0.113808	0.0220813	0.133151	0.0654444
YER058W	PET117	0.131231	0.0327901	0.335863	0.108455
YER059W	PCL6	0.0841429	0.0339076	0.337647	0.0831553
YER060W	FCY21	0.108591	0.0291633	0.0650953	0.101818
YER060W-A	FCY22	0.0560244	0.0188657	0.160172	0.0311879
YER061C	CEM1	0.0634706	0.0165145	0.356037	0.075595
YER062C	HOR2
YER063W	THO1	0.126347	0.0730433	0.371747	0.158407
YER064C		0.162184	0.20588	0.199065
YER065C	ICL1	0.0961448	0.064167	0.120358	0.0782524
YER066C-A
YER066W		0.078049	0.0600003	0.118052
YER067C-A
YER067W		0.0798993	0.216344	0.612697
YER068C-A
YER068W	MOT2	0.195054	0.0930982	0.271362	0.132131
YER069W	ARG5,6	0.0766019	0.0264983	0.0455597
YER070W	RNR1	0.532053	0.0833963	0.167167
YER071C
YER072W	VTC1	0.204091	0.0698501	0.122364	0.155855
YER073W	ALD5	0.224507	0.114737	0.0555696	0.332234
YER074W	RPS24A
YER074W-A	YOS1	0.0632482	0.0445037	0.13317
YER075C	PTP3
YER076C		0.0550297	0.0287377	0.14628
YER076W-A		0.0492923	0.0267765	0.125985
YER077C		0.0962824	0.0891682	0.138737
YER078C
YER078W-A
YER079C-A		0.0559746	0.0128172	0.218889
YER079W		0.0752338	0.0481598	0.652448
YER080W		0.115754	0.0438077	0.256577
YER081W	SER3	0.256992	0.14961	0.398266	0.151067
YER082C	UTP7	0.294509	0.263965	0.130006	0.0648813
YER083C	GET2
YER084W
YER084W-A
YER085C
YER086W	ILV1	0.123028	0.0526608		0.0809974
YER087C-A
YER087C-B	SBH1
YER087W		0.108262	0.0273472
YER088C	DOT6	0.178323	0.0742789	0.199128	0.36541
YER088C-A
YER088W-B
YER089C	PTC2	0.229447	0.118851	0.281732
YER090C-A
YER090W	TRP2	0.0588135	0.0406076	0.0376802
YER091C	MET6
YER091C-A
YER092W	IES5	0.217388	0.0704045	0.305949	0.213434
YER093C	TSC11	0.105382	0.0930251	0.142515
YER093C-A
YER094C	PUP3	0.315733	0.103118	0.53787	0.359014
YER095W	RAD51	0.0702189
YER096W	SHC1
YER097W
YER098W	UBP9	0.0267465	0.0252147	0.0418146
YER099C	PRS2	0.13423	0.0935248	0.108993	0.119669
YER100W	UBC6	0.152563	0.035907	0.278043	0.166308
YER101C	AST2	0.0465439	0.0133013	0.113617	0.035088
YER102W	RPS8B	0.277914	0.0951702
YER103W	SSA4	0.0792326	0.303251	0.414913	0.230717
YER104W	RTT105	0.0608069	0.0186722	0.105599	0.0556817
YER105C	NUP157	0.0996196	0.0888974	0.088028	0.0550806
YER106W	MAM1
YER107C	GLE2
YER107W-A
YER109C	FLO8	0.0714163	0.0334011	0.150182	0.0415271
YER110C	KAP123	0.0460739	0.00996837
YER111C	SWI4
YER112W	LSM4	0.162674	0.0847805	0.27466	0.0851029
YER113C		0.0995787	0.0319888	0.0679346
YER114C	BOI2	0.0588206	0.0166513	0.0372325	0.0251758
YER115C	SPR6	0.109963	0.0628264	0.0916148	0.0268651
YER116C	SLX8	0.0753154	0.0300404	0.184502	0.0536038
YER117W	RPL23B	0.63491	0.172254	0.161874	0.42894
YER118C	SHO1
YER119C	AVT6	0.0404922	0.0103518	0.105359	0.0622923
YER119C-A
YER120W	SCS2	0.189992	0.0375637	0.222129	0.0728331
YER121W
YER122C	GLO3
YER123W	YCK3	0.124051	0.0385882	0.107706	0.177334
YER124C	DSE1	1.12688	1.75276	1.10793	0.55753
YER125W	RSP5	0.214914	0.0784737	0.277578	0.196896
YER126C	NSA2	0.226245	0.325814	0.0278604	0.119325
YER127W	LCP5
YER128W		0.0783281	0.0200183	0.140914
YER129W	SAK1	0.130806	0.0787583	0.0852769	0.101657
YER130C		0.425926	0.280073	0.98637
YER131W	RPS26B	0.398958	0.194794	0.0763778	0.132202
YER132C	PMD1
YER133W	GLC7	0.315606	0.185977	0.692419	0.186784
YER133W-A
YER134C		0.0813978	0.0171543	0.336126
YER135C
YER136W	GDI1
YER137C		0.106855	0.0990162	0.131166
YER137W-A
YER138W-A
YER139C		0.0895374	0.0597466	0.202194
YER140W		0.101164	0.0587966	0.229041
YER141W	COX15	0.0900201	0.0519113	0.282849	0.0876899
YER142C	MAG1	0.0591661	0.0601384	0.226768	0.17927
YER143W	DDI1	0.134262	0.129884	0.362921	0.232446
YER144C	UBP5
YER145C	FTR1	0.167363	0.306754	0.140739	0.245891
YER145C-A
YER146W	LSM5	0.286721	0.0597645	0.333022	0.241541
YER147C	SCC4	0.167839	0.0688471
YER147C-A		0.201926	0.0885549	0.294059
YER148W	SPT15	0.178595	0.0759022	0.217201	0.122309
YER148W-A
YER149C	PEA2	0.0978329	0.0418834	0.164812	0.0376044
YER150W	SPI1	0.0519382	0.163714	1.61162	0.0419761
YER151C	UBP3
YER152C		0.197708	0.037999	0.205227
YER152W-A
YER153C	PET122
YER154W	OXA1	0.176185	0.0536257	0.204283	0.0859617
YER155C	BEM2	0.198585	0.390682	0.185369	0.0794677
YER156C		0.45352	0.126258	0.452268
YER157W	COG3	0.0856896	0.0269013	0.138157	0.0713331
YER158C		0.0901505	0.14607
YER158W-A
YER159C	BUR6	0.711307	0.290386	0.712908	0.556579
YER161C	SPT2	0.173992	0.0536676	0.295912	0.131076
YER162C	RAD4	0.0862551	0.0532471	0.265396	0.111728
YER163C		0.0999159	0.026968	0.266209
YER164W	CHD1	0.0859711	0.0378273	0.0788536	0.0332117
YER165C-A
YER165W	PAB1	0.627992	0.344034	0.594684	0.388634
YER166W	DNF1
YER167W	BCK2	0.215144	0.0701649	0.20154	0.182293
YER168C	CCA1	0.0740069	0.0244238	0.121835	0.0736446
YER169W	RPH1	0.137205	0.0499009	0.386968	0.0702794
YER170W	ADK2	0.0713	0.0216545	0.19444	0.0732421
YER171W	RAD3
YER172C	BRR2
YER172C-A
YER173W	RAD24	0.0734607	0.036674	0.0878432	0.112841
YER174C	GRX4	0.110344	0.0524168	0.187067	0.125169
YER175C	TMT1	0.0427071	0.0227635	0.120175	0.114105
YER175W-A
YER176W	ECM32	0.183165	0.0459695	0.374537	0.210071
YER177W	BMH1	0.835531	0.25739	1.50769	0.665675
YER178W	PDA1	0.145004	0.0524915	0.299008	0.102676
YER179W	DMC1	0.0264599	0.0205086	0.0603085	0.0157908
YER180C	ISC10	0.170094	0.0703965	0.162598	0.0793824
YER180C-A	SLO1
YER181C
YER182W		0.0713681	0.024099	0.39483
YER183C	FAU1	0.0938262	0.0224058	0.247384	0.0750343
YER184C
YER185W		0.0115198	0.00583395
YER186C
YER187W		0.111372	0.0355222	0.176004
YER188C-A
YER188W
YER189W
YER190C-A
YER190C-B
YER190W	YRF1-2
YFL001W	DEG1	0.115079	0.0388698	0.0975271	0.0600528
YFL002C	SPB4
YFL003C	MSH4	0.116773	0.0397249	1.1428	0.535004
YFL004W	VTC2	0.269483	0.159522	0.129092	0.194343
YFL005W	SEC4	0.207858	0.0879654	0.299771
YFL007W	BLM10	0.0700638	0.0359673	0.117802	0.0378117
YFL008W	SMC1	0.0858804	0.0237985	0.0786782	0.0990052
YFL009W	CDC4	0.104517	0.0435578	0.163129	0.117549
YFL010C	WWM1
YFL010W-A	AUA1
YFL011W	HXT10
YFL012W
YFL012W-A
YFL013C	IES1	0.134606	0.0670162	0.27686	0.186659
YFL013W-A
YFL014W	HSP12
YFL015C
YFL015W-A
YFL016C	MDJ1	0.633414	0.0639412	2.10949	1.52609
YFL017C	GNA1	0.193457	0.0567241	0.510303	0.107175
YFL017W-A	SMX2
YFL018C	LPD1	0.074782	0.0393136	0.234438	0.0961521
YFL019C
YFL020C	PAU5	0.0119198	0.00699324	0.0133968	0.00777444
YFL021C-A
YFL021W	GAT1	0.0397324	0.0161559	0.0355261	0.0517514
YFL022C	FRS2	0.178879	0.0341471	0.171962	0.0964513
YFL023W	BUD27	0.183355	0.176844	0.0747352	0.060434
YFL024C	EPL1
YFL025C	BST1	0.163556	0.166976	0.194134	0.0539598
YFL026W	STE2	0.569889	0.402131	0.26686	0.086168
YFL027C	GYP8
YFL028C	CAF16	0.11268	0.0410501	0.207719	0.0712935
YFL029C	CAK1	0.0716294	0.0390791	0.241807	0.0811045
YFL030W	AGX1
YFL031C-A
YFL031W	HAC1	1.04765	0.169441	1.73646	1.14878
YFL032W		0.216122	0.0363567	0.278488
YFL033C	RIM15
YFL034C-A	RPL22B
YFL034C-B	MOB2	0.119445	0.0239597	0.137383	0.0695202
YFL034W		0.0425517	0.0200958	0.0829189
YFL036W	RPO41	0.146456	0.160892	0.236852	0.136428
YFL037W	TUB2	0.104423	0.0184599
YFL038C	YPT1	0.326987	0.0868738	0.58938
YFL039C	ACT1	0.215728	0.0742505	0.143985	0.20298
YFL040W
YFL041W	FET5	0.129044	0.0296032	0.239023	0.149272
YFL041W-A
YFL042C
YFL044C	OTU1	0.300933	0.0629552	0.522976
YFL045C	SEC53	0.397584	0.155462	0.454545	0.188369
YFL046W		0.0833745	0.048236	0.164865
YFL047W	RGD2	0.096392	0.0399309	0.160743	0.169865
YFL048C	EMP47	0.170007	0.0530513	0.286864	0.0984116
YFL049W	SWP82	0.159507	0.0802492
YFL050C	ALR2	0.110871	0.0484125	0.105426	0.0754516
YFL051C		0.0371428	0.0321363	0.0237776
YFL052W		0.0143865	0.0607092
YFL053W	DAK2	0.0129265	0.0127702
YFL054C
YFL055W	AGP3	0.0266079	0.016829
YFL056C	AAD6	0.105332	0.0235895	0.0777311	0.183067
YFL057C	AAD16	0.0818905	0.0251839	0.0644737	0.119537
YFL058W	THI5	0.0110827	0.0133161
YFL059W	SNZ3	0.0360141	0.0448083
YFL060C	SNO3	0.0426182	0.021501	0.10486	0.0429102
YFL061W		0.0223889	0.0324459	0.0321508
YFL062W	COS4
YFL063W
YFL064C
YFL065C
YFL066C
YFL067W		0.03969	0.00467707	0.0364956
YFL068W
YFR001W	LOC1	0.134922	0.109066	0.0928128	0.0895928
YFR002W	NIC96	0.18783	0.115953	0.207415	0.123167
YFR003C	YPI1	0.175486	0.0396317	0.565695
YFR004W	RPN11	0.325689	0.079805	0.647153	0.322129
YFR005C	SAD1	0.074109	0.0215837	0.104827	0.0364585
YFR006W		0.110337	0.0802944	0.121268
YFR007W		0.0875018	0.0272014	0.343753
[truncated: 4,577 more rows]
