# Supplementary material for: A Complete Set of Nascent Transcription Rates for Yeast Genes
Source: PLoS One. 2010 Nov 16;5(11):e15442. doi: 10.1371/journal.pone.0015442 (PMC2982843; doi:10.1371/journal.pone.0015442)
Supplement: Table S3 — Percentage of TR devoted to compensate the dilution effect due to the cell growth. The TR necessary to compensate the dilution is computed using the RA and a generation time of 113 minutes. As the TR necessary to compensate the dilution is computed independently to the nascent TR some values show percentage greater than 100% or are negative. In those cases we have arbitrary substituted the values to either 100% or 0%, meaning that the TR devoted to compensate the dilution is much larger (100%) or negligible (0%) in respect to the TR devoted to compensate the degradation. (XLS) [file pone.0015442.s004.xls]

## Sheet: Sup.table3
Sistematic name	Gene name	RA (mol/cell) [Nagalakshmi et al. 2008; Miura et al. 2008]	RS (min) [Wang et al. 2002]	TR (mol/min)	TR dil. (used to compensate dilution)	Percentage of TR to compensate degradation	Percentage of TR to compensate dilution
YAL001C	TFC3		27	0.0940812		na	na
YAL002W	VPS8		54	0.0609133		na	na
YAL003W	EFB1	45.9196		1.78133	0.281673	0.158125	0.841875
YAL004W			88	0.52997		na	na
YAL005C	SSA1	74.2912		1.20342	0.455705	0.378675	0.621325
YAL007C	ERP2	4.29095	22	0.0606609	0.0263209	0.433903	0.566097
YAL008W	FUN14	2.04941	42	0.0379475	0.0125712	0.331278	0.668722
YAL009W	SPO7	1.24886			0.00766056	na	na
YAL010C	MDM10	0.576397	16		0.00353564	na	na
YAL011W	SWC3	0.800551		0.110558	0.00491062	0.0444168	0.955583
YAL012W	CYS3	15.1785	47		0.0931053	na	na
YAL013W	DEP1	2.65783	14	0.253392	0.0163033	0.0643401	0.93566
YAL014C	SYN8	5.53981	19	0.176694	0.0339815	0.192319	0.807681
YAL015C	NTG1	1.53706	126		0.00942839	na	na
YAL016C-A		0.0640441			0.000392849	na	na
YAL016C-B						na	na
YAL016W	TPD3	3.17018	39	0.188948	0.019446	0.102918	0.897082
YAL017W	PSK1		71	0.068824		na	na
YAL018C		0.0640441	48		0.000392849	na	na
YAL019W	FUN30	1.40897	15	0.142656	0.00864269	0.0605842	0.939416
YAL019W-A						na	na
YAL020C	ATS1	0.512353	40	0.101735	0.0031428	0.0308921	0.969108
YAL021C	CCR4	0.832573	22	0.222883	0.00510704	0.0229135	0.977086
YAL022C	FUN26	2.88198	15		0.0176782	na	na
YAL023C	PMT2	7.8454	20	0.305488	0.0481241	0.157532	0.842468
YAL024C	LTE1	0.288198	25	0.0854588	0.00176782	0.0206863	0.979314
YAL025C	MAK16	2.40165			0.0147319	na	na
YAL026C	DRS2		40			na	na
YAL026C-A						na	na
YAL027W			33	0.0736615		na	na
YAL028W	FRT2	1.08875	43		0.00667844	na	na
YAL029C	MYO4	2.40165	28	0.0797402	0.0147319	0.184748	0.815252
YAL030W	SNC1	5.41173	41	0.0972422	0.0331958	0.341372	0.658628
YAL031C	GIP4		18	0.094115		na	na
YAL031W-A						na	na
YAL032C	PRP45	0.32022	31		0.00196425	na	na
YAL033W	POP5	1.24886	9	0.100896	0.00766056	0.0759251	0.924075
YAL034C	FUN19	0.672463	45	0.121074	0.00412492	0.0340694	0.965931
YAL034C-B						na	na
YAL034W-A	MTW1	0.832573		0.256128	0.00510704	0.0199394	0.980061
YAL035W	FUN12		27	0.259886		na	na
YAL036C	RBG1	3.61849	17	0.107829	0.022196	0.205844	0.794156
YAL037C-A		173.015			1.06128	na	na
YAL037C-B						na	na
YAL037W		0.128088	88	0.0273964	0.000785699	0.0286789	0.971321
YAL038W	CDC19		72			na	na
YAL039C	CYC3	2.62581			0.0161068	na	na
YAL040C	CLN3	1.50504	18	0.162876	0.00923196	0.0566809	0.943319
YAL041W	CDC24	2.08143	7	0.136073	0.0127676	0.0938292	0.906171
YAL042C-A						na	na
YAL042W	ERV46	7.10889	17	0.244191	0.0436063	0.178574	0.821426
YAL043C	PTA1	0.576397	14		0.00353564	na	na
YAL044C	GCV3		40	0.129625		na	na
YAL044W-A						na	na
YAL045C			24	0.141765		na	na
YAL046C		2.78592	30	0.193165	0.0170889	0.0884681	0.911532
YAL047C	SPC72		15	0.0493579		na	na
YAL047W-A						na	na
YAL048C	GEM1	0.704485	52	0.0718035	0.00432134	0.0601829	0.939817
YAL049C		3.61849	35	0.112543	0.022196	0.197222	0.802778
YAL051W	OAF1	0.192132		0.0409066	0.00117855	0.0288107	0.971189
YAL053W	FLC2	2.62581	23	0.0999731	0.0161068	0.161112	0.838888
YAL054C	ACS1	1.28088	73	0.0584623	0.00785699	0.134394	0.865606
YAL055W	PEX22	1.08875	23	0.0917025	0.00667844	0.0728272	0.927173
YAL056C-A						na	na
YAL056W	GPB2	1.15279			0.00707129	na	na
YAL058W	CNE1		16			na	na
YAL059C-A						na	na
YAL059W	ECM1	1.56908	15	0.167526	0.00962481	0.0574526	0.942547
YAL060W	BDH1	5.18757	70		0.0318208	na	na
YAL061W		3.7786		0.0591775	0.0231781	0.391671	0.608329
YAL062W	GDH3	0.640441	51	0.0702318	0.00392849	0.0559361	0.944064
YAL063C	FLO9		58			na	na
YAL063C-A		0.0640441			0.000392849	na	na
YAL064C-A			29			na	na
YAL064W						na	na
YAL064W-B			30	0.0670362		na	na
YAL065C		0.0640441	34	0.110286	0.000392849	0.00356208	0.996438
YAL066W		0.0640441			0.000392849	na	na
YAL067C	SEO1	0.192132			0.00117855	na	na
YAL067W-A						na	na
YAL068C						na	na
YAL068W-A						na	na
YAL069W			32			na	na
YAR002C-A	ERP1	2.08143	20	0.0906419	0.0127676	0.140858	0.859142
YAR002W	NUP60	1.37695	14	0.176774	0.00844626	0.0477799	0.95222
YAR003W	SWD1	0.800551		0.0947554	0.00491062	0.0518242	0.948176
YAR007C	RFA1	6.56452	13	0.0935003	0.0402671	0.430662	0.569338
YAR008W	SEN34	0.256176	13	0.0281434	0.0015714	0.0558353	0.944165
YAR014C	BUD14	2.91401	22		0.0178746	na	na
YAR015W	ADE1	8.87011	19	0.159009	0.0544096	0.342179	0.657821
YAR018C	KIN3	3.42636	7	0.0737232	0.0210174	0.285086	0.714914
YAR019C	CDC15	0.992683	24	0.0407559	0.00608917	0.149406	0.850594
YAR019W-A		0.0640441			0.000392849	na	na
YAR020C	PAU7		49			na	na
YAR023C		0.384265			0.0023571	na	na
YAR027W	UIP3	1.82526	35		0.0111962	na	na
YAR028W		1.28088	24	0.202049	0.00785699	0.0388865	0.961114
YAR029W			37	0.241363		na	na
YAR030C						na	na
YAR031W	PRM9		23	0.0651606		na	na
YAR033W	MST28			0.0515081		na	na
YAR035C-A						na	na
YAR035W	YAT1		36			na	na
YAR042W	SWH1	0.800551	29	0.188472	0.00491062	0.0260549	0.973945
YAR047C		0.256176	31		0.0015714	na	na
YAR050W	FLO1		36	0.0975614		na	na
YAR053W			45			na	na
YAR060C			32	0.0467804		na	na
YAR064W				0.0658672		na	na
YAR066W			41			na	na
YAR068W			18	0.288577		na	na
YAR069C						na	na
YAR070C						na	na
YAR071W	PHO11		14			na	na
YAR073W	IMD1		25	0.0588307		na	na
YAR075W		0.0640441	26		0.000392849	na	na
YBL001C	ECM15	7.23698	33		0.044392	na	na
YBL002W	HTB2	18.6048	10	0.616727	0.114123	0.185046	0.814954
YBL003C	HTA2	34.808	7	0.689429	0.213514	0.309696	0.690304
YBL004W	UTP20	1.44099		0.167657	0.00883911	0.0527214	0.947279
YBL005W	PDR3	2.4657	43	0.132444	0.0151247	0.114197	0.885803
YBL006C	LDB7	5.50779	13	0.282246	0.033785	0.119701	0.880299
YBL006W-A						na	na
YBL007C	SLA1	4.70724	24	0.173265	0.0288744	0.166649	0.833351
YBL008W	HIR1	0.0640441			0.000392849	na	na
YBL008W-A						na	na
YBL009W		1.08875	19	0.0584386	0.00667844	0.114281	0.885719
YBL010C		1.12077	11	0.0531977	0.00687486	0.129232	0.870768
YBL011W	SCT1	1.85728	14	0.120458	0.0113926	0.0945774	0.905423
YBL012C		0.192132		0.112207	0.00117855	0.0105034	0.989497
YBL013W	FMT1	0.0640441			0.000392849	na	na
YBL014C	RRN6	0.512353		0.164043	0.0031428	0.0191584	0.980842
YBL015W	ACH1	0.832573		0.0769129	0.00510704	0.0664003	0.9336
YBL016W	FUS3	1.34493			0.00824984	na	na
YBL017C	PEP1	3.07412			0.0188568	na	na
YBL018C	POP8		48	0.192327		na	na
YBL019W	APN2			0.0548443		na	na
YBL020W	RFT1	0.768529	11	0.0736039	0.00471419	0.0640481	0.935952
YBL021C	HAP3	0.800551		0.269242	0.00491062	0.0182387	0.981761
YBL022C	PIM1	2.68985	17	0.052602	0.0164997	0.31367	0.68633
YBL023C	MCM2	0.512353	12		0.0031428	na	na
YBL024W	NCL1	0.416287	8	0.276697	0.00255352	0.00922858	0.990771
YBL025W	RRN10	0.672463		0.133873	0.00412492	0.0308122	0.969188
YBL026W	LSM2	7.07687	29	0.122028	0.0434099	0.355738	0.644262
YBL027W	RPL19B	36.281	33	0.603747	0.222549	0.368613	0.631387
YBL028C		6.50048	10		0.0398742	na	na
YBL029C-A		5.34768			0.0328029	na	na
YBL029W		0.576397	17		0.00353564	na	na
YBL030C	PET9	12.8408	21	0.109204	0.0787663	0.721274	0.278726
YBL031W	SHE1	0.480331	14	0.0436692	0.00294637	0.0674702	0.93253
YBL032W	HEK2	6.34037	8	0.19741	0.0388921	0.197012	0.802988
YBL033C	RIB1	1.40897	30	0.247467	0.00864269	0.0349246	0.965075
YBL034C	STU1	0.640441	17		0.00392849	na	na
YBL035C	POL12	0.864595	7	0.101986	0.00530347	0.0520018	0.947998
YBL036C		1.85728	13	0.152699	0.0113926	0.0746082	0.925392
YBL037W	APL3	0.640441		0.047364	0.00392849	0.0829427	0.917057
YBL038W	MRPL16	2.20952	13		0.0135533	na	na
YBL039C	URA7	1.79323	9		0.0109998	na	na
YBL039C-A						na	na
YBL039W-B		0.896617			0.00549989	na	na
YBL040C	ERD2	4.80331	26	0.116926	0.0294637	0.251986	0.748014
YBL041W	PRE7	7.5572	19	0.336195	0.0463562	0.137885	0.862115
YBL042C	FUI1	1.40897	4	0.323195	0.00864269	0.0267414	0.973259
YBL043W	ECM13	0.256176	33		0.0015714	na	na
YBL044W		0.224154	15		0.00137497	na	na
YBL045C	COR1	4.45106	31	0.0535588	0.027303	0.509777	0.490223
YBL046W	PSY4	1.28088	12	0.112829	0.00785699	0.0696364	0.930364
YBL047C	EDE1	4.29095	37	0.243286	0.0263209	0.108189	0.891811
YBL048W		0.192132	32		0.00117855	na	na
YBL049W	MOH1			0.0893533		na	na
YBL050W	SEC17	4.80331	22		0.0294637	na	na
YBL051C	PIN4	3.4904	21	0.141248	0.0214103	0.15158	0.84842
YBL052C	SAS3		11	0.10546		na	na
YBL053W				0.160291		na	na
YBL054W		0.480331	16		0.00294637	na	na
YBL055C		2.52974	34	0.184924	0.0155176	0.0839132	0.916087
YBL056W	PTC3	7.65327	15	0.216598	0.0469455	0.21674	0.78326
YBL057C	PTH2		24	0.181947		na	na
YBL058W	SHP1		15	0.388315		na	na
YBL059C-A		2.52974			0.0155176	na	na
YBL059W		1.72919	23	0.115128	0.0106069	0.0921321	0.907868
YBL060W		1.82526	28	0.0828815	0.0111962	0.135087	0.864913
YBL061C	SKT5		29	0.091366		na	na
YBL062W			32	0.124721		na	na
YBL063W	KIP1			0.0669992		na	na
YBL064C	PRX1			0.035595		na	na
YBL065W						na	na
YBL066C	SEF1	0.0640441		0.0567557	0.000392849	0.00692177	0.993078
YBL067C	UBP13	1.05673	10	0.105625	0.00648202	0.061368	0.938632
YBL068W	PRS4	2.24154		0.0563758	0.0137497	0.243894	0.756106
YBL068W-A						na	na
YBL069W	AST1		11	0.175548		na	na
YBL070C			79			na	na
YBL071C			29			na	na
YBL071C-B						na	na
YBL071W-A	KTI11			0.118502		na	na
YBL072C	RPS8A		22	0.451989		na	na
YBL073W		0.0640441		0.0741499	0.000392849	0.00529804	0.994702
YBL074C	AAR2	0.0640441	20	0.0769946	0.000392849	0.0051023	0.994898
YBL075C	SSA3	0.704485		0.100362	0.00432134	0.0430577	0.956942
YBL076C	ILS1		33	0.0770466		na	na
YBL077W			65	0.263687		na	na
YBL078C	ATG8	2.1775	104	0.102667	0.0133569	0.130099	0.869901
YBL079W	NUP170	0.416287	27	0.112409	0.00255352	0.0227162	0.977284
YBL080C	PET112			0.058546		na	na
YBL081W			6			na	na
YBL082C	ALG3		16	0.0623284		na	na
YBL083C			19	0.0410354		na	na
YBL084C	CDC27	0.672463	27		0.00412492	na	na
YBL085W	BOI1	1.24886			0.00766056	na	na
YBL086C		1.3129	15	0.0805146	0.00805341	0.100024	0.899976
YBL087C	RPL23A	35.8327	27	0.622805	0.219799	0.352918	0.647082
YBL088C	TEL1		40	0.0607026		na	na
YBL089W	AVT5		26			na	na
YBL090W	MRP21	2.04941	24	0.152117	0.0125712	0.0826417	0.917358
YBL091C	MAP2	12.6807	26	0.0668963	0.0777842	1	0
YBL091C-A	SCS22	2.68985		0.596291	0.0164997	0.0276705	0.972329
YBL092W	RPL32	68.0789		0.499054	0.417599	0.836781	0.163219
YBL093C	ROX3	3.29827	12	0.295083	0.0202317	0.0685629	0.931437
YBL094C			27			na	na
YBL095W			26	0.167274		na	na
YBL096C				0.279749		na	na
YBL097W	BRN1		24			na	na
YBL098W	BNA4	0.512353			0.0031428	na	na
YBL099W	ATP1	20.4621	34	0.214765	0.125515	0.584432	0.415568
YBL100C			31	0.142178		na	na
YBL100W-C		0.128088			0.000785699	na	na
YBL101C	ECM21	1.3129	21	0.0830705	0.00805341	0.0969467	0.903053
YBL102W	SFT2	3.17018	13	0.0667853	0.019446	0.291172	0.708828
YBL103C	RTG3	1.08875	12	0.0933345	0.00667844	0.0715538	0.928446
YBL104C		0.576397		0.0431177	0.00353564	0.0819998	0.918
YBL105C	PKC1	1.12077	14	0.107906	0.00687486	0.0637117	0.936288
YBL106C	SRO77	0.416287	17	0.0403247	0.00255352	0.0633239	0.936676
YBL107C		3.39434	10	0.108982	0.020821	0.191051	0.808949
YBL107W-A						na	na
YBL108C-A						na	na
YBL108W		0.0640441			0.000392849	na	na
YBL109W						na	na
YBL111C						na	na
YBL112C			7			na	na
YBL113C			5			na	na
YBL113W-A						na	na
YBR001C	NTH2	0.832573	49	0.0884055	0.00510704	0.0577684	0.942232
YBR002C	RER2	1.18482	9	0.193661	0.00726771	0.037528	0.962472
YBR003W	COQ1	3.36232	12	0.0641141	0.0206246	0.321686	0.678314
YBR004C	GPI18	1.63312	10		0.0100177	na	na
YBR005W	RCR1	1.53706			0.00942839	na	na
YBR006W	UGA2	3.4904	35	0.0725964	0.0214103	0.294922	0.705078
YBR007C	DSF2	1.28088		0.0967208	0.00785699	0.0812337	0.918766
YBR008C	FLR1	0.640441	17		0.00392849	na	na
YBR009C	HHF1		6	1.62305		na	na
YBR010W	HHT1	40.4118	6	1.85793	0.247888	0.133421	0.866579
YBR011C	IPP1	18.893	49	0.216394	0.115891	0.535553	0.464447
YBR012C		1.6011			0.00982124	na	na
YBR013C						na	na
YBR014C		4.54713	20	0.0512066	0.0278923	0.544702	0.455298
YBR015C	MNN2	3.10614	12	0.163638	0.0190532	0.116435	0.883565
YBR016W		9.4465	18	0.31168	0.0579453	0.185912	0.814088
YBR017C	KAP104	1.92132	38		0.0117855	na	na
YBR018C	GAL7	0.0640441	26		0.000392849	na	na
YBR019C	GAL10	0.192132	18	0.0432499	0.00117855	0.0272497	0.97275
YBR020W	GAL1	0.0640441	31	0.0615329	0.000392849	0.00638438	0.993616
YBR021W	FUR4	0.128088	21	0.0543231	0.000785699	0.0144634	0.985537
YBR022W	POA1	1.47301	19	0.0852595	0.00903554	0.105977	0.894023
YBR023C	CHS3	0.384265	22		0.0023571	na	na
YBR024W	SCO2	2.27357	40	0.0814063	0.0139462	0.171315	0.828685
YBR025C		25.2654		0.193426	0.154979	0.801232	0.198768
YBR026C	ETR1	2.7539	79	0.0500284	0.0168925	0.337659	0.662341
YBR027C			35			na	na
YBR028C			9	0.109543		na	na
YBR029C	CDS1	2.04941	23	0.0334344	0.0125712	0.375996	0.624004
YBR030W		1.02471	29	0.128975	0.00628559	0.0487348	0.951265
YBR031W	RPL4A	88.1247	7		0.540561	na	na
YBR032W		0.352243	24	0.299361	0.00216067	0.0072176	0.992782
YBR033W		0.128088	31	0.0497219	0.000785699	0.0158019	0.984198
YBR034C	HMT1	5.50779	6	0.205303	0.033785	0.164562	0.835438
YBR035C	PDX3	2.43368	29	0.181841	0.0149283	0.0820952	0.917905
YBR036C	CSG2	6.75665	14	0.132113	0.0414456	0.313713	0.686287
YBR037C	SCO1	0.608419		0.102394	0.00373207	0.0364482	0.963552
YBR038W	CHS2	1.02471		0.0401277	0.00628559	0.15664	0.84336
YBR039W	ATP3	4.73926	19	0.135575	0.0290709	0.214426	0.785574
YBR040W	FIG1	0.192132	71		0.00117855	na	na
YBR041W	FAT1	0.896617		0.13238	0.00549989	0.0415462	0.958454
YBR042C		2.01739	11		0.0123748	na	na
YBR043C	QDR3	0.896617	11	0.186444	0.00549989	0.029499	0.970501
YBR044C	TCM62	0.768529	17	0.123174	0.00471419	0.0382726	0.961727
YBR045C	GIP1	0.128088			0.000785699	na	na
YBR046C	ZTA1	2.43368	19	0.0636965	0.0149283	0.234366	0.765634
YBR047W		1.24886			0.00766056	na	na
YBR048W	RPS11B	10.3431	32	0.402574	0.0634452	0.157599	0.842401
YBR049C	REB1	1.28088	8	0.160046	0.00785699	0.0490919	0.950908
YBR050C	REG2	0.192132	56	0.0672157	0.00117855	0.0175338	0.982466
YBR051W		0.0640441			0.000392849	na	na
YBR052C	RFS1	10.3431	33	0.201053	0.0634452	0.315564	0.684436
YBR053C		4.355	66	0.0390402	0.0267138	0.684264	0.315736
YBR054W	YRO2	9.19033	100	0.077996	0.0563739	0.722779	0.277221
YBR055C	PRP6	2.27357	9		0.0139462	na	na
YBR056C-B						na	na
YBR056W		3.97073	43		0.0243567	na	na
YBR056W-A						na	na
YBR057C	MUM2	0.672463	11	0.127835	0.00412492	0.0322675	0.967733
YBR058C	UBP14	2.49772	22	0.115613	0.0153211	0.132521	0.867479
YBR058C-A	TSC3	11.7521			0.0720879	na	na
YBR059C	AKL1	1.40897	29	0.0569341	0.00864269	0.151801	0.848199
YBR060C	ORC2	1.34493		0.131051	0.00824984	0.0629516	0.937048
YBR061C	TRM7	1.18482	10	0.123396	0.00726771	0.0588973	0.941103
YBR062C		2.52974	29	0.205421	0.0155176	0.0755403	0.92446
YBR063C		1.21684	34	0.0493043	0.00746414	0.151389	0.848611
YBR064W			34			na	na
YBR065C	ECM2	0.192132	21	0.0511271	0.00117855	0.0230513	0.976949
YBR066C	NRG2	1.05673	173		0.00648202	na	na
YBR067C	TIP1	17.7402		0.324415	0.108819	0.335433	0.664567
YBR068C	BAP2	6.72463	13	0.857136	0.0412492	0.0481244	0.951876
YBR069C	TAT1	0.864595	20		0.00530347	na	na
YBR070C	ALG14	1.66515	21	0.0649741	0.0102141	0.157203	0.842797
YBR071W		1.24886	26	0.254152	0.00766056	0.0301417	0.969858
YBR072C-A		0.32022			0.00196425	na	na
YBR072W	HSP26	12.1684		0.0308801	0.0746414	1	0
YBR073W	RDH54	1.15279	10	0.0749505	0.00707129	0.0943461	0.905654
YBR074W		2.01739	14	0.0813059	0.0123748	0.1522	0.8478
YBR076C-A						na	na
YBR076W	ECM8		50			na	na
YBR077C	SLM4	1.50504	10		0.00923196	na	na
YBR078W	ECM33	6.72463	46	0.994901	0.0412492	0.0414606	0.958539
YBR079C	RPG1	2.59379	24	0.139398	0.0159104	0.114137	0.885863
YBR080C	SEC18	1.79323	13		0.0109998	na	na
YBR081C	SPT7	1.40897		0.110389	0.00864269	0.0782928	0.921707
YBR082C	UBC4	37.1776	30	0.564398	0.228049	0.404057	0.595943
YBR083W	TEC1	0.672463	27		0.00412492	na	na
YBR084C-A	RPL19A		19	0.49229		na	na
YBR084W	MIS1	4.89937	18	0.179103	0.030053	0.167797	0.832203
YBR085C-A		5.76397			0.0353564	na	na
YBR085W	AAC3	0.960661			0.00589274	na	na
YBR086C	IST2	2.04941	15		0.0125712	na	na
YBR087W	RFC5	2.56176	13		0.015714	na	na
YBR088C	POL30	4.73926	18		0.0290709	na	na
YBR089C-A	NHP6B	6.5325			0.0400706	na	na
YBR089W				0.110927		na	na
YBR090C			28	0.33554		na	na
YBR091C	MRS5			0.176076		na	na
YBR092C	PHO3	10.0869	8	0.385432	0.0618738	0.160531	0.839469
YBR093C	PHO5	6.91676	10	0.115733	0.0424277	0.366602	0.633398
YBR094W		0.704485	15	0.0639032	0.00432134	0.0676232	0.932377
YBR095C	RXT2	0.576397	11	0.106607	0.00353564	0.0331653	0.966835
YBR096W		5.21959	38	0.0468968	0.0320172	0.682716	0.317284
YBR097W	VPS15	0.256176		0.0748478	0.0015714	0.0209946	0.979005
YBR098W	MMS4	0.864595			0.00530347	na	na
YBR099C						na	na
YBR101C	FES1	41.3405	79	1.06989	0.253584	0.237019	0.762981
YBR102C	EXO84	1.66515	19	0.100911	0.0102141	0.101218	0.898782
YBR103C-A						na	na
YBR103W	SIF2		10	0.134162		na	na
YBR104W	YMC2	0.864595	8	0.0627582	0.00530347	0.0845064	0.915494
YBR105C	VID24	2.97805	11	0.0958493	0.0182675	0.190586	0.809414
YBR106W	PHO88	11.688	16	0.748767	0.071695	0.0957508	0.904249
YBR107C	IML3	0.800551	10	0.111137	0.00491062	0.0441854	0.955815
YBR108W		1.28088	26	0.0894472	0.00785699	0.0878394	0.912161
YBR109C	CMD1	21.3907	22	0.190611	0.131212	0.688375	0.311625
YBR109W-A						na	na
YBR110W	ALG1	1.85728	9	0.0412142	0.0113926	0.276425	0.723575
YBR111C	YSA1	30.485	24	0.105312	0.186996	1	0
YBR111W-A	SUS1	3.39434			0.020821	na	na
YBR112C	CYC8	1.82526	21	0.622895	0.0111962	0.0179745	0.982026
YBR113W		0.288198	17	0.135408	0.00176782	0.0130555	0.986944
YBR114W	RAD16	0.608419	19	0.0629379	0.00373207	0.0592976	0.940702
YBR115C	LYS2	1.66515	18	0.135495	0.0102141	0.0753837	0.924616
YBR116C		0.0640441	113	0.171351	0.000392849	0.00229266	0.997707
YBR117C	TKL2		59	0.0748965		na	na
YBR118W	TEF2	82.9051	45	0.31425	0.508544	1	0
YBR119W	MUD1	2.36963	22	0.154432	0.0145354	0.0941216	0.905878
YBR120C	CBP6	4.86735	23	0.0679454	0.0298566	0.43942	0.56058
YBR121C	GRS1	15.3065	27	0.399024	0.093891	0.235301	0.764699
YBR121C-A						na	na
YBR122C	MRPL36	3.45838	16	0.18985	0.0212139	0.11174	0.88826
YBR123C	TFC1	0.704485	13	0.112856	0.00432134	0.0382909	0.961709
YBR124W		0.0640441		0.0497232	0.000392849	0.00790072	0.992099
YBR125C	PTC4	0.416287		0.0910457	0.00255352	0.0280466	0.971953
YBR126C	TPS1	12.5526	103		0.0769985	na	na
YBR126W-A						na	na
YBR126W-B						na	na
YBR127C	VMA2	6.94878	38	0.201403	0.0426242	0.211636	0.788364
YBR128C	ATG14	0.288198	57	0.0660997	0.00176782	0.0267448	0.973255
YBR129C	OPY1	1.21684	26	0.109332	0.00746414	0.0682702	0.93173
YBR130C	SHE3	0.672463	14	0.12799	0.00412492	0.0322285	0.967771
YBR131C-A						na	na
YBR131W	CCZ1	0.448309	21	0.0415923	0.00274995	0.0661166	0.933883
YBR132C	AGP2	0.32022	39		0.00196425	na	na
YBR133C	HSL7	1.28088	8	0.100809	0.00785699	0.0779395	0.922061
YBR134W		0.0640441	23	0.0607689	0.000392849	0.00646464	0.993535
YBR135W	CKS1	1.50504	17	0.122532	0.00923196	0.0753433	0.924657
YBR136W	MEC1	0.352243		0.0569426	0.00216067	0.0379447	0.962055
YBR137W		3.65051	34	0.0761585	0.0223924	0.294024	0.705976
YBR138C		0.512353			0.0031428	na	na
YBR139W		0.992683	64	0.0845985	0.00608917	0.0719772	0.928023
YBR140C	IRA1	1.40897	38	0.0528856	0.00864269	0.163422	0.836578
YBR141C		0.288198		0.0927582	0.00176782	0.0190584	0.980942
YBR141W-A						na	na
YBR142W	MAK5	1.82526		0.157346	0.0111962	0.0711566	0.928843
YBR143C	SUP45	9.54257	10	0.162673	0.0585346	0.35983	0.64017
YBR144C		0.16011		0.0655253	0.000982124	0.0149885	0.985012
YBR145W	ADH5	4.25893	50	0.056447	0.0261245	0.462814	0.537186
YBR146W	MRPS9	5.76397		0.11579	0.0353564	0.305351	0.694649
YBR147W		0.640441			0.00392849	na	na
YBR148W	YSW1	0.224154	34		0.00137497	na	na
YBR149W	ARA1	11.1117	22	0.0956705	0.0681594	0.712439	0.287561
YBR150C	TBS1	4.09882			0.0251424	na	na
YBR151W	APD1	6.88474	12	0.124044	0.0422313	0.340454	0.659546
YBR152W	SPP381	0.192132		0.118489	0.00117855	0.00994646	0.990054
YBR153W	RIB7	0.800551	7	0.207618	0.00491062	0.0236521	0.976348
YBR154C	RPB5	5.12353	4	0.32895	0.031428	0.0955403	0.90446
YBR155W	CNS1	0.672463	7		0.00412492	na	na
YBR156C	SLI15	0.512353	39	0.0791181	0.0031428	0.0397229	0.960277
YBR157C	ICS2	1.69717		0.13552	0.0104105	0.0768188	0.923181
YBR158W	AMN1	6.37239	4	0.416778	0.0390885	0.0937874	0.906213
YBR159W		2.97805	17	0.089389	0.0182675	0.204359	0.795641
YBR160W	CDC28	1.66515	16	0.144914	0.0102141	0.0704839	0.929516
YBR161W	CSH1	0.768529	23	0.0447246	0.00471419	0.105405	0.894595
YBR162C	TOS1	7.269	35	0.163403	0.0445884	0.272874	0.727126
YBR162W-A	YSY6	22.8958	14		0.140444	na	na
YBR163W	DEM1	0.384265	15	0.0478258	0.0023571	0.049285	0.950715
YBR164C	ARL1	5.47577	14	0.135799	0.0335886	0.24734	0.75266
YBR165W	UBS1	0.192132	30	0.0724208	0.00117855	0.0162736	0.983726
YBR166C	TYR1	1.79323	42	0.0775455	0.0109998	0.141849	0.858151
YBR167C	POP7	0.640441	71	0.0808603	0.00392849	0.0485837	0.951416
YBR168W	PEX32	0.576397		0.0319069	0.00353564	0.110811	0.889189
YBR169C	SSE2	8.90213		0.0949512	0.0546061	0.575096	0.424904
YBR170C	NPL4	2.08143	42		0.0127676	na	na
YBR171W	SEC66	4.80331	13	0.0800705	0.0294637	0.367972	0.632028
YBR172C	SMY2	1.47301	3	0.309594	0.00903554	0.0291851	0.970815
YBR173C	UMP1	3.17018	21	0.431669	0.019446	0.0450485	0.954951
YBR174C			93	0.169992		na	na
YBR175W	SWD3	1.79323	59	0.0983089	0.0109998	0.11189	0.88811
YBR176W	ECM31	1.63312		0.0434205	0.0100177	0.230713	0.769287
YBR177C	EHT1	4.29095	31		0.0263209	na	na
YBR178W		0.192132	34	0.0944657	0.00117855	0.0124759	0.987524
YBR179C	FZO1	1.66515	26	0.0736624	0.0102141	0.138661	0.861339
YBR180W	DTR1	0.0640441		0.0397076	0.000392849	0.00989355	0.990106
YBR181C	RPS6B		24	0.261879		na	na
YBR182C	SMP1	0.256176			0.0015714	na	na
YBR182C-A		0.128088			0.000785699	na	na
YBR183W	YPC1	1.34493	71	0.0479809	0.00824984	0.17194	0.82806
YBR184W		0.0640441			0.000392849	na	na
YBR185C	MBA1	3.2022	23	0.0653507	0.0196425	0.30057	0.69943
YBR186W	PCH2	0.0640441		0.0217581	0.000392849	0.0180553	0.981945
YBR187W		7.5572	14	0.282308	0.0463562	0.164205	0.835795
YBR188C	NTC20	0.896617	16	0.0940445	0.00549989	0.0584818	0.941518
YBR189W	RPS9B	52.0038	18		0.318994	na	na
YBR190W			73	0.0745407		na	na
YBR191W	RPL21A	60.7138	23	0.621632	0.372421	0.599103	0.400897
YBR191W-A						na	na
YBR192W	RIM2	0.864595	21	0.182279	0.00530347	0.0290953	0.970905
YBR193C	MED8	3.42636	15		0.0210174	na	na
YBR194W		1.05673	32	0.238387	0.00648202	0.0271912	0.972809
YBR195C	MSI1	0.768529	9	0.0802909	0.00471419	0.0587139	0.941286
YBR196C	PGI1	61.3222	59	0.931439	0.376153	0.403841	0.596159
YBR196C-A		0.480331			0.00294637	na	na
YBR196C-B		0.288198			0.00176782	na	na
YBR197C		1.08875	21	0.217995	0.00667844	0.0306358	0.969364
YBR198C	TAF5	2.11346	13		0.012964	na	na
YBR199W	KTR4	5.44375	19	0.106212	0.0333922	0.314391	0.685609
YBR200W	BEM1	0.960661	4		0.00589274	na	na
YBR200W-A		0.0640441			0.000392849	na	na
YBR201C-A		1.12077			0.00687486	na	na
YBR201W	DER1	1.24886	31	0.0794446	0.00766056	0.0964265	0.903573
YBR202W	CDC47	0.448309		0.210582	0.00274995	0.0130588	0.986941
YBR203W	COS111	0.16011		0.0354977	0.000982124	0.0276672	0.972333
YBR204C		2.65783	29		0.0163033	na	na
YBR205W	KTR3		14			na	na
YBR206W			29	0.178003		na	na
YBR207W	FTH1	4.80331	17	0.153282	0.0294637	0.192218	0.807782
YBR208C	DUR1,2	1.28088		0.107427	0.00785699	0.0731381	0.926862
YBR209W		0.0640441	35		0.000392849	na	na
YBR210W	ERV15	1.69717	24	0.0581948	0.0104105	0.178891	0.821109
YBR211C	AME1	1.47301	25	0.0597132	0.00903554	0.151316	0.848684
YBR212W	NGR1	4.00276	56	0.10403	0.0245531	0.236019	0.763981
YBR213W	MET8	0.384265		0.046851	0.0023571	0.0503104	0.94969
YBR214W	SDS24	2.68985	67	0.112668	0.0164997	0.146445	0.853555
YBR215W	HPC2	0.640441	7	0.106508	0.00392849	0.0368845	0.963115
YBR216C	YBP1	0.960661	43	0.0740097	0.00589274	0.0796211	0.920379
YBR217W	ATG12	1.40897	28	0.0736439	0.00864269	0.117358	0.882642
YBR218C	PYC2	2.43368	33		0.0149283	na	na
YBR219C		0.0640441	26	0.0767822	0.000392849	0.00511642	0.994884
YBR220C			12	0.141189		na	na
YBR221C	PDB1	10.5032	25		0.0644273	na	na
YBR221W-A						na	na
YBR222C	PCS60		26			na	na
YBR223C	TDP1		34	0.0751719		na	na
YBR223W-A						na	na
YBR224W				0.0580391		na	na
YBR225W			26	0.086747		na	na
YBR226C						na	na
YBR227C	MCX1		13			na	na
YBR228W	SLX1	0.288198			0.00176782	na	na
YBR229C	ROT2	1.56908	19	0.0354451	0.00962481	0.271542	0.728458
YBR230C	OM14	5.12353	37		0.031428	na	na
YBR230W-A		1.8893			0.0115891	na	na
YBR231C	SWC5	0.352243	15		0.00216067	na	na
YBR232C			32	0.0318482		na	na
YBR233W	PBP2	0.640441		0.0662547	0.00392849	0.0592938	0.940706
YBR233W-A	DAD3	1.18482			0.00726771	na	na
YBR234C	ARC40	5.86003	35	0.116831	0.0359457	0.307672	0.692328
YBR235W		1.92132	10	0.0953457	0.0117855	0.123608	0.876392
YBR236C	ABD1	1.95334		0.113121	0.0119819	0.105921	0.894079
YBR237W	PRP5	0.864595	14	0.110178	0.00530347	0.0481356	0.951864
YBR238C		0.736507	26	0.264636	0.00451777	0.0170716	0.982928
YBR239C		0.576397	11	0.115196	0.00353564	0.0306924	0.969308
YBR240C	THI2	0.032022			0.000196425	na	na
YBR241C		0.704485	26		0.00432134	na	na
YBR242W			16	0.149715		na	na
YBR243C	ALG7		12	0.0372049		na	na
YBR244W	GPX2	9.95886	12		0.0610881	na	na
YBR245C	ISW1	1.40897		0.094709	0.00864269	0.0912551	0.908745
YBR246W			15	0.046971		na	na
YBR247C	ENP1	1.34493	10	0.23522	0.00824984	0.0350728	0.964927
YBR248C	HIS7	5.3797	11	0.225535	0.0329994	0.146316	0.853684
YBR249C	ARO4	10.2791	29	0.192563	0.0630523	0.327438	0.672562
YBR250W		0.128088			0.000785699	na	na
YBR251W	MRPS5	2.27357	14	0.170277	0.0139462	0.0819028	0.918097
YBR252W	DUT1	2.56176	15	0.29383	0.015714	0.0534797	0.94652
YBR253W	SRB6	1.44099	24	0.204904	0.00883911	0.0431379	0.956862
YBR254C	TRS20	1.37695		0.145953	0.00844626	0.0578699	0.94213
YBR255C-A				0.148801		na	na
YBR255W			18	0.102618		na	na
YBR256C	RIB5	5.34768	22	0.13878	0.0328029	0.236367	0.763633
YBR257W	POP4		12	0.0749823		na	na
YBR258C	SHG1		14	0.13482		na	na
YBR259W		0.800551	14		0.00491062	na	na
YBR260C	RGD1	0.704485	10	0.0847766	0.00432134	0.0509733	0.949027
YBR261C		3.58647	15	0.188409	0.0219996	0.116765	0.883235
YBR262C		1.40897	13	0.539039	0.00864269	0.0160335	0.983967
YBR263W	SHM1		33	0.173614		na	na
YBR264C	YPT10		16	0.141758		na	na
YBR265W	TSC10	2.1775	9	0.256385	0.0133569	0.052097	0.947903
YBR266C	SLM6		4	0.229434		na	na
YBR267W	REI1	1.53706	10	0.555678	0.00942839	0.0169673	0.983033
YBR268W	MRPL37	4.03478	15	0.225202	0.0247495	0.109899	0.890101
YBR269C		0.736507	17	0.176494	0.00451777	0.0255972	0.974403
YBR270C		0.256176	23	0.0472522	0.0015714	0.0332555	0.966744
YBR271W		0.640441	12	0.0750522	0.00392849	0.0523435	0.947657
YBR272C	HSM3	0.256176	19		0.0015714	na	na
YBR273C	UBX7	2.24154	21	0.116839	0.0137497	0.117681	0.882319
YBR274W	CHK1	1.08875	16	0.0424562	0.00667844	0.157302	0.842698
YBR275C	RIF1	1.69717		0.105186	0.0104105	0.0989724	0.901028
YBR276C	PPS1	2.72187	9		0.0166961	na	na
YBR277C			18			na	na
YBR278W	DPB3	4.32298	6	0.126392	0.0265173	0.209803	0.790197
YBR279W	PAF1	1.53706	10	0.185065	0.00942839	0.0509465	0.949054
YBR280C	SAF1	1.28088			0.00785699	na	na
YBR281C		3.04209	11	0.0799781	0.0186603	0.233318	0.766682
YBR282W	MRPL27	2.78592		0.0933646	0.0170889	0.183035	0.816965
YBR283C	SSH1	5.79599	14	0.163225	0.0355529	0.217814	0.782186
YBR284W		0.0640441	42	0.0213255	0.000392849	0.0184216	0.981578
YBR285W		0.192132			0.00117855	na	na
YBR286W	APE3	14.538	26	0.45567	0.0891768	0.195705	0.804295
YBR287W		4.54713	31	0.25414	0.0278923	0.109752	0.890248
YBR288C	APM3	1.50504	11	0.0894862	0.00923196	0.103166	0.896834
YBR289W	SNF5	0.960661	32	0.165377	0.00589274	0.0356322	0.964368
YBR290W	BSD2	1.92132		0.221301	0.0117855	0.0532555	0.946745
YBR291C	CTP1	1.24886	5	0.14516	0.00766056	0.0527733	0.947227
YBR292C		0.608419			0.00373207	na	na
YBR293W	VBA2	1.63312		0.0512099	0.0100177	0.19562	0.80438
YBR294W	SUL1	0.0640441	6	0.0544149	0.000392849	0.00721952	0.99278
YBR295W	PCA1	0.704485	29	0.0655001	0.00432134	0.0659746	0.934025
YBR296C	PHO89	1.15279	21		0.00707129	na	na
YBR296C-A		0.0640441			0.000392849	na	na
YBR297W	MAL33	0.352243	28		0.00216067	na	na
YBR298C	MAL31	0.256176	18	0.0562499	0.0015714	0.027936	0.972064
YBR298C-A						na	na
YBR299W	MAL32		49	0.0233031		na	na
YBR300C		0.0640441		0.106174	0.000392849	0.00370004	0.9963
YBR301W	DAN3			0.0245657		na	na
YBR302C	COS2		13			na	na
YCL001W	RER1	8.45382	26		0.0518561	na	na
YCL001W-A		0.256176			0.0015714	na	na
YCL001W-B		0.128088			0.000785699	na	na
YCL002C		2.08143	15	0.0592924	0.0127676	0.215333	0.784667
YCL004W	PGS1	1.50504	35	0.0698504	0.00923196	0.132168	0.867832
YCL005W	LDB16	2.11346	9	0.0865113	0.012964	0.149854	0.850146
YCL005W-A	VMA9					na	na
YCL007C			28	0.194458		na	na
YCL008C	STP22	1.18482	26	0.108333	0.00726771	0.0670869	0.932913
YCL009C	ILV6	4.54713	41		0.0278923	na	na
YCL010C	SGF29	0.288198	19	0.255685	0.00176782	0.00691406	0.993086
YCL011C	GBP2	5.21959	17	0.257677	0.0320172	0.124253	0.875747
YCL012C		1.53706			0.00942839	na	na
YCL014W	BUD3	0.32022	16	0.0506752	0.00196425	0.0387615	0.961238
YCL016C	DCC1	0.192132	9	0.0886145	0.00117855	0.0132997	0.9867
YCL017C	NFS1	4.25893	12	0.107114	0.0261245	0.243895	0.756105
YCL018W	LEU2	0.0640441	68		0.000392849	na	na
YCL021W-A		0.576397		0.0734462	0.00353564	0.0481392	0.951861
YCL022C			8	0.0569595		na	na
YCL023C		0.0640441	18		0.000392849	na	na
YCL024W	KCC4	0.544375	7	0.0478613	0.00333922	0.0697687	0.930231
YCL025C	AGP1	1.18482	3	0.102155	0.00726771	0.0711443	0.928856
YCL026C-A	FRM2	0.128088			0.000785699	na	na
YCL026C-B				0.0399768		na	na
YCL027W	FUS1					na	na
YCL028W	RNQ1	3.26625	31	0.105803	0.0200353	0.189364	0.810636
YCL029C	BIK1	1.05673	14	0.151084	0.00648202	0.0429033	0.957097
YCL030C	HIS4	4.41904	5		0.0271066	na	na
YCL031C	RRP7	4.0668	7	0.239725	0.0249459	0.104061	0.895939
YCL032W	STE50	0.736507	6		0.00451777	na	na
YCL033C			27	0.122858		na	na
YCL034W	LSB5		17	0.145549		na	na
YCL035C	GRX1	26.0339	56	0.259291	0.159693	0.615884	0.384116
YCL036W	GFD2	0.288198			0.00176782	na	na
YCL037C	SRO9	0.480331	17	0.410999	0.00294637	0.00716881	0.992831
YCL038C	ATG22		28	0.0286838		na	na
YCL039W	GID7					na	na
YCL040W	GLK1	14.506	60		0.0889804	na	na
YCL041C			27			na	na
YCL042W			82			na	na
YCL043C	PDI1	7.33305	21	0.409989	0.0449813	0.109713	0.890287
YCL044C	MGR1	0.192132	25	0.0786141	0.00117855	0.0149916	0.985008
YCL045C		4.99544	16		0.0306423	na	na
YCL046W			22	0.397554		na	na
YCL047C		4.00276	24	0.0445772	0.0245531	0.5508	0.4492
YCL048W	SPS22	0.640441	57	0.0631403	0.00392849	0.0622185	0.937781
YCL048W-A		0.0640441			0.000392849	na	na
YCL049C		1.05673	10		0.00648202	na	na
YCL050C	APA1	10.6313	35	0.228803	0.065213	0.285018	0.714982
YCL051W	LRE1	1.28088	18	0.166139	0.00785699	0.0472916	0.952708
YCL052C	PBN1	5.47577	20	0.0470513	0.0335886	0.713872	0.286128
YCL054W	SPB1	1.79323	6	0.323573	0.0109998	0.0339948	0.966005
YCL055W	KAR4	1.47301		0.138649	0.00903554	0.0651685	0.934831
YCL056C			23	0.109641		na	na
YCL057C-A						na	na
YCL057W	PRD1		24	0.142956		na	na
YCL058C	FYV5		12			na	na
YCL058W-A						na	na
YCL059C	KRR1	3.74658	15	0.155789	0.0229817	0.147518	0.852482
YCL061C	MRC1	0.384265		0.0791363	0.0023571	0.0297853	0.970215
YCL063W	VAC17	0.512353	17	0.117992	0.0031428	0.0266356	0.973364
YCL064C	CHA1	6.91676	20		0.0424277	na	na
YCL065W		0.0640441		0.0772902	0.000392849	0.00508279	0.994917
YCL066W	HMLALPHA1		10	0.0909326		na	na
YCL067C	HMLALPHA2		7			na	na
YCL068C			12	0.0273694		na	na
YCL069W	VBA3			0.0339075		na	na
YCL073C				0.0165387		na	na
YCL076W		0.0640441			0.000392849	na	na
YCR001W		0.224154	26		0.00137497	na	na
YCR002C	CDC10	6.37239	17	0.121787	0.0390885	0.320958	0.679042
YCR003W	MRPL32	1.37695	20	0.138057	0.00844626	0.0611797	0.93882
YCR004C	YCP4	7.42912	29		0.0455705	na	na
YCR005C	CIT2	16.9076	42	0.981861	0.103712	0.105628	0.894372
YCR006C		0.448309	43	0.121797	0.00274995	0.0225781	0.977422
YCR007C		0.192132	35	0.0635753	0.00117855	0.0185378	0.981462
YCR008W	SAT4	0.576397	26	0.153587	0.00353564	0.0230205	0.97698
YCR009C	RVS161	6.18026		0.220648	0.03791	0.171812	0.828188
YCR010C	ADY2	0.0640441		0.0202681	0.000392849	0.0193826	0.980617
YCR011C	ADP1	0.832573	52		0.00510704	na	na
YCR012W	PGK1		70	1.33384		na	na
YCR013C			58			na	na
YCR014C	POL4	0.672463	29	0.0880141	0.00412492	0.0468666	0.953133
YCR015C		1.08875		0.0835384	0.00667844	0.0799446	0.920055
YCR016W		1.6011	19	0.11717	0.00982124	0.0838204	0.91618
YCR017C	CWH43	3.13816		0.106909	0.0192496	0.180056	0.819944
YCR018C	SRD1	3.90669			0.0239638	na	na
YCR018C-A						na	na
YCR019W	MAK32		17	0.0368752		na	na
YCR020C	PET18			0.0236757		na	na
YCR020C-A	MAK31	2.08143		0.124039	0.0127676	0.102932	0.897068
YCR020W-B	HTL1	1.08875			0.00667844	na	na
YCR021C	HSP30	15.7228			0.0964445	na	na
YCR022C		0.0640441	74		0.000392849	na	na
YCR023C		0.384265	23	0.116301	0.0023571	0.0202671	0.979733
YCR024C	SLM5	0.512353	33	0.054844	0.0031428	0.0573042	0.942696
YCR024C-A	PMP1		20			na	na
YCR024C-B		20.5582			0.126105	na	na
YCR025C		0.0640441	78	0.0896053	0.000392849	0.00438422	0.995616
YCR026C	NPP1	0.576397	18	0.216529	0.00353564	0.0163287	0.983671
YCR027C	RHB1	0.480331	11	0.120425	0.00294637	0.0244664	0.975534
YCR028C	FEN2	1.24886	29	0.0350159	0.00766056	0.218774	0.781226
YCR028C-A	RIM1	8.48584	29		0.0520525	na	na
YCR030C	SYP1	0.544375	25		0.00333922	na	na
YCR031C	RPS14A		35	0.294145		na	na
YCR032W	BPH1	0.32022			0.00196425	na	na
YCR033W	SNT1	1.05673	20	0.210097	0.00648202	0.0308525	0.969148
YCR034W	FEN1	6.91676	11	0.0537947	0.0424277	0.788697	0.211303
YCR035C	RRP43	3.90669	17	0.186112	0.0239638	0.12876	0.87124
YCR036W	RBK1	4.61117	18	0.210678	0.0282852	0.134257	0.865743
YCR037C	PHO87	1.95334	12	0.184777	0.0119819	0.0648453	0.935155
YCR038C	BUD5	0.704485	31		0.00432134	na	na
YCR038W-A						na	na
YCR039C	MATALPHA2		10	0.0501808		na	na
YCR040W	MATALPHA1		8			na	na
YCR041W			31	0.0637364		na	na
YCR042C	TAF2			0.0380222		na	na
YCR043C		3.13816			0.0192496	na	na
YCR044C	PER1	2.52974	13		0.0155176	na	na
YCR045C		0.0640441		0.12447	0.000392849	0.00315618	0.996844
YCR045W-A						na	na
YCR046C	IMG1	1.02471	5	0.19526	0.00628559	0.0321909	0.967809
YCR047C	BUD23	1.02471	10	0.197766	0.00628559	0.031783	0.968217
YCR047W-A						na	na
YCR048W	ARE1			0.105264		na	na
YCR049C			12	0.0746398		na	na
YCR050C			12			na	na
YCR051W		2.30559	9		0.0141426	na	na
YCR052W	RSC6	1.79323	11	0.152115	0.0109998	0.0723122	0.927688
YCR053W	THR4	18.7329	16	0.138191	0.114908	0.831517	0.168483
YCR054C	CTR86	1.12077	12		0.00687486	na	na
YCR057C	PWP2	1.37695	6		0.00844626	na	na
YCR059C	YIH1	1.85728	12		0.0113926	na	na
YCR060W	TAH1	1.95334	14	0.227832	0.0119819	0.052591	0.947409
YCR061W		0.704485	15	0.0459271	0.00432134	0.0940913	0.905909
YCR063W	BUD31	0.192132	34	0.368087	0.00117855	0.00320182	0.996798
YCR064C		0.0640441	15	0.18126	0.000392849	0.00216733	0.997833
YCR065W	HCM1	0.128088	5	0.199551	0.000785699	0.00393734	0.996063
YCR066W	RAD18	0.576397	17	0.0635015	0.00353564	0.0556782	0.944322
YCR067C	SED4	2.04941		0.0461815	0.0125712	0.272213	0.727787
YCR068W	ATG15	0.224154	11	0.11336	0.00137497	0.0121293	0.987871
YCR069W	CPR4		15	0.145659		na	na
YCR071C	IMG2		16	0.166553		na	na
YCR072C	RSA4	1.40897	9	0.176198	0.00864269	0.0490511	0.950949
YCR073C	SSK22	0.576397	11		0.00353564	na	na
YCR073W-A	SOL2	2.40165	19		0.0147319	na	na
YCR075C	ERS1	0.256176	52	0.076616	0.0015714	0.0205101	0.97949
YCR075W-A						na	na
YCR076C			24	0.0983875		na	na
YCR077C	PAT1	1.63312	14		0.0100177	na	na
YCR079W		0.736507		0.15384	0.00451777	0.0293666	0.970633
YCR081C-A						na	na
YCR081W	SRB8		15			na	na
YCR082W	AHC2	7.01283	17	0.1482	0.043017	0.290263	0.709737
YCR083W	TRX3	1.44099		0.149847	0.00883911	0.0589878	0.941012
YCR084C	TUP1	3.13816	12	0.167296	0.0192496	0.115063	0.884937
YCR085W		0.192132			0.00117855	na	na
YCR086W	CSM1		17	0.111554		na	na
YCR087C-A						na	na
YCR087W			14	0.134693		na	na
YCR088W	ABP1	3.58647	39	0.331238	0.0219996	0.0664161	0.933584
YCR089W	FIG2					na	na
YCR090C			11			na	na
YCR091W	KIN82	0.896617	51	0.0447208	0.00549989	0.122983	0.877017
YCR092C	MSH3	0.896617	8		0.00549989	na	na
YCR093W	CDC39	0.448309			0.00274995	na	na
YCR094W	CDC50	0.576397	9	0.0520727	0.00353564	0.0678982	0.932102
YCR095C		1.79323	14		0.0109998	na	na
YCR095W-A		0.32022			0.00196425	na	na
YCR096C	HMRA2		7	0.0846882		na	na
YCR097W	HMRA1	10.8555	23		0.066588	na	na
YCR097W-A		0.0640441			0.000392849	na	na
YCR098C	GIT1	0.0640441	18		0.000392849	na	na
YCR099C		0.128088	14		0.000785699	na	na
YCR100C			18	0.0616411		na	na
YCR101C		0.0640441	18	0.0655147	0.000392849	0.00599636	0.994004
YCR102C						na	na
YCR102W-A						na	na
YCR104W	PAU3		14	0.013849		na	na
YCR105W	ADH7	0.512353			0.0031428	na	na
YCR106W	RDS1	0.192132			0.00117855	na	na
YCR107W	AAD3		19			na	na
YCR108C						na	na
YDL001W	RMD1	0.896617	13	0.0692076	0.00549989	0.0794695	0.92053
YDL002C	NHP10	0.704485	24	0.336082	0.00432134	0.012858	0.987142
YDL003W	MCD1	0.512353	10	0.164172	0.0031428	0.0191433	0.980857
YDL004W	ATP16	8.48584	17	0.0685471	0.0520525	0.759369	0.240631
YDL005C	MED2	1.6011	12	0.0710375	0.00982124	0.138254	0.861746
YDL006W	PTC1	1.76121	28	0.133635	0.0108034	0.0808423	0.919158
YDL007C-A		0.0640441			0.000392849	na	na
YDL007W	RPT2	7.46114	12	0.143871	0.045767	0.318111	0.681889
YDL008W	APC11	1.34493	62	0.173894	0.00824984	0.0474419	0.952558
YDL009C			39			na	na
YDL010W			22	0.086404		na	na
YDL011C			16	0.159143		na	na
YDL012C		5.25162		0.175695	0.0322137	0.18335	0.81665
YDL013W	HEX3	0.576397		0.155486	0.00353564	0.0227393	0.977261
YDL014W	NOP1	9.47853	7	0.129477	0.0581417	0.449052	0.550948
YDL015C	TSC13	9.09426	27	0.109365	0.0557846	0.510076	0.489924
YDL016C			31	0.105727		na	na
YDL017W	CDC7		6			na	na
YDL018C	ERP3	2.72187	16	0.0424704	0.0166961	0.393123	0.606877
YDL019C	OSH2	0.992683		0.107494	0.00608917	0.0566466	0.943353
YDL020C	RPN4	5.09151	36	0.793814	0.0312315	0.0393436	0.960656
YDL021W	GPM2	0.896617		0.0652596	0.00549989	0.0842771	0.915723
YDL022C-A						na	na
YDL022W	GPD1	9.31842	99	0.610058	0.0571596	0.0936953	0.906305
YDL023C				0.479379		na	na
YDL024C	DIA3	0.576397	70	0.0192541	0.00353564	0.18363	0.81637
YDL025C				0.0846785		na	na
YDL025W-A						na	na
YDL026W		0.0640441			0.000392849	na	na
YDL027C		1.63312	77	0.0718722	0.0100177	0.139382	0.860618
YDL028C	MPS1	0.256176		0.107461	0.0015714	0.014623	0.985377
YDL029W	ARP2	10.3111	39	0.128744	0.0632488	0.491275	0.508725
YDL030W	PRP9	0.768529			0.00471419	na	na
YDL031W	DBP10	0.800551	10		0.00491062	na	na
YDL032W						na	na
YDL033C	SLM3	0.896617	12	0.54428	0.00549989	0.0101049	0.989895
YDL034W			32	0.0934966		na	na
YDL035C	GPR1	0.960661		0.138747	0.00589274	0.0424711	0.957529
YDL036C	PUS9	0.448309	15		0.00274995	na	na
YDL037C	BSC1	1.05673	51	0.55356	0.00648202	0.0117097	0.98829
YDL038C			41			na	na
YDL039C	PRM7	2.52974	132		0.0155176	na	na
YDL040C	NAT1	4.22691	14	0.158545	0.0259281	0.163538	0.836462
YDL041W			34			na	na
YDL042C	SIR2	0.576397	12	0.0725228	0.00353564	0.0487522	0.951248
YDL043C	PRP11	0.448309		0.0702803	0.00274995	0.0391283	0.960872
YDL044C	MTF2	0.128088	17	0.150649	0.000785699	0.00521542	0.994785
YDL045C	FAD1	3.13816	30	0.0900236	0.0192496	0.213829	0.786171
YDL045W-A	MRP10	2.49772	29	0.119826	0.0153211	0.127861	0.872139
YDL046W	NPC2	4.13084	20	0.186686	0.0253388	0.135729	0.864271
YDL047W	SIT4	1.56908	12	0.392152	0.00962481	0.0245436	0.975456
YDL048C	STP4	2.20952	24		0.0135533	na	na
YDL049C	KNH1	0.32022		0.0800278	0.00196425	0.0245446	0.975455
YDL050C			17			na	na
YDL051W	LHP1		14			na	na
YDL052C	SLC1	2.24154	14		0.0137497	na	na
YDL053C	PBP4	6.88474	24	0.124045	0.0422313	0.340451	0.659549
YDL054C	MCH1	1.18482	15		0.00726771	na	na
YDL055C	PSA1	106.153	12	1.01966	0.651148	0.638594	0.361406
YDL056W	MBP1	0.768529	10	0.119096	0.00471419	0.039583	0.960417
YDL057W		2.7539	63	0.11169	0.0168925	0.151244	0.848756
YDL058W	USO1	1.40897	29		0.00864269	na	na
YDL059C	RAD59	1.3129			0.00805341	na	na
YDL060W	TSR1	1.47301	9	0.206501	0.00903554	0.0437554	0.956245
YDL061C	RPS29B	74.5153	20	0.212929	0.45708	1	0
YDL062W		0.0640441	25	0.13888	0.000392849	0.0028287	0.997171
YDL063C		1.6011		0.130811	0.00982124	0.0750796	0.92492
YDL064W	UBC9	2.33761	15		0.014339	na	na
YDL065C	PEX19	2.84996	14	0.245671	0.0174818	0.0711593	0.928841
YDL066W	IDP1	3.68254	33	0.0620717	0.0225888	0.363915	0.636085
YDL067C	COX9	8.06956			0.049499	na	na
YDL068W				0.0672436		na	na
YDL069C	CBS1	2.59379	20	0.0509719	0.0159104	0.312141	0.687859
YDL070W	BDF2	4.29095	5	0.515141	0.0263209	0.0510945	0.948905
YDL071C		0.128088	16	0.153274	0.000785699	0.00512611	0.994874
YDL072C	YET3	8.06956	24	0.216241	0.049499	0.228907	0.771093
YDL073W		3.33029	16	0.0812591	0.0204282	0.251395	0.748605
YDL074C	BRE1	4.09882	7	0.187963	0.0251424	0.133762	0.866238
YDL075W	RPL31A	109.9	24	0.603987	0.67413	1	0
YDL076C	RXT3	1.08875	19	0.106999	0.00667844	0.0624162	0.937584
YDL077C	VAM6	1.02471	31		0.00628559	na	na
YDL078C	MDH3	3.93871	23	0.23668	0.0241602	0.10208	0.89792
YDL079C	MRK1	0.192132	29	0.0627127	0.00117855	0.0187928	0.981207
YDL080C	THI3	0.640441	25	0.062788	0.00392849	0.0625676	0.937432
YDL081C	RPP1A	91.6471	18	0.448308	0.562168	1	0
YDL082W	RPL13A	19.4054	18	0.402397	0.119033	0.295811	0.704189
YDL083C	RPS16B		24	0.631968		na	na
YDL084W	SUB2	17.5801	37	0.159644	0.107837	0.675486	0.324514
YDL085C-A		2.40165			0.0147319	na	na
YDL085W	NDE2	0.256176	32	0.0439966	0.0015714	0.0357163	0.964284
YDL086C-A						na	na
YDL086W		4.22691	19	0.141441	0.0259281	0.183314	0.816686
YDL087C	LUC7	0.256176		0.125951	0.0015714	0.0124762	0.987524
YDL088C	ASM4	1.92132	22	0.281773	0.0117855	0.0418262	0.958174
YDL089W		1.69717	23	0.0386761	0.0104105	0.269171	0.730829
YDL090C	RAM1	1.05673	10		0.00648202	na	na
YDL091C	UBX3	0.352243		0.0705653	0.00216067	0.0306195	0.969381
YDL092W	SRP14	6.78867	12	0.216247	0.041642	0.192567	0.807433
YDL093W	PMT5	1.34493	35	0.048646	0.00824984	0.169589	0.830411
YDL094C			47	0.0359779		na	na
YDL095W	PMT1		18	0.233749		na	na
YDL096C	OPI6		22	0.264727		na	na
YDL097C	RPN6	6.46845	11	0.405253	0.0396778	0.0979087	0.902091
YDL098C	SNU23	0.576397	26	0.100729	0.00353564	0.0351007	0.964899
YDL099W	BUG1	1.66515	11	0.254189	0.0102141	0.040183	0.959817
YDL100C	GET3	20.2059	36	0.299045	0.123944	0.414466	0.585534
YDL101C	DUN1	1.08875		0.0948105	0.00667844	0.0704399	0.92956
YDL102W	CDC2	0.32022	41		0.00196425	na	na
YDL103C	QRI1	3.4904	21	0.0964682	0.0214103	0.221941	0.778059
YDL104C	QRI7			0.131386		na	na
YDL105W	NSE4			0.149618		na	na
YDL106C	PHO2	0.960661	42	0.0840507	0.00589274	0.0701093	0.929891
YDL107W	MSS2	0.640441		0.162626	0.00392849	0.0241566	0.975843
YDL108W	KIN28	1.37695	27	0.204349	0.00844626	0.0413326	0.958667
YDL109C		0.256176	18		0.0015714	na	na
YDL110C	TMA17	4.355	45	0.292079	0.0267138	0.0914607	0.908539
YDL111C	RRP42		6	0.129867		na	na
YDL112W	TRM3		17	0.150273		na	na
YDL113C	ATG20	1.37695	26	0.0784685	0.00844626	0.107639	0.892361
YDL114W		0.192132	32		0.00117855	na	na
YDL114W-A						na	na
YDL115C	IWR1	1.34493	32		0.00824984	na	na
YDL116W	NUP84	1.15279	17	0.104027	0.00707129	0.0679756	0.932024
YDL117W	CYK3	0.736507	19	0.163772	0.00451777	0.0275857	0.972414
YDL118W				0.0591748		na	na
YDL119C		1.15279	23	0.086441	0.00707129	0.0818048	0.918195
YDL120W	YFH1	3.93871	12	0.0766135	0.0241602	0.315352	0.684648
YDL121C		6.8207		0.0734506	0.0418385	0.569614	0.430386
YDL122W	UBP1	3.71456	15		0.0227853	na	na
YDL123W	SNA4	1.76121		0.157584	0.0108034	0.0685561	0.931444
YDL124W		26.5783		0.115367	0.163033	1	0
YDL125C	HNT1	11.3358	31	0.363981	0.0695343	0.191038	0.808962
YDL126C	CDC48	16.9076	38	0.694267	0.103712	0.149384	0.850616
YDL127W	PCL2	0.256176	13	0.108579	0.0015714	0.0144723	0.985528
YDL128W	VCX1	3.84265	10	0.180651	0.023571	0.130478	0.869522
YDL129W		0.384265		0.138518	0.0023571	0.0170166	0.982983
YDL130W	RPP1B	37.0815	31	0.49513	0.22746	0.459395	0.540605
YDL130W-A	STF1	6.5325			0.0400706	na	na
YDL131W	LYS21	2.81794	6		0.0172854	na	na
YDL132W	CDC53	2.40165	58	0.132163	0.0147319	0.111467	0.888533
YDL133C-A	RPL41B					na	na
YDL133W		1.79323	28		0.0109998	na	na
YDL134C	PPH21	3.71456	16	0.257617	0.0227853	0.0884463	0.911554
YDL135C	RDI1	3.65051	32	0.130573	0.0223924	0.171494	0.828506
YDL136W	RPL35B	28.6918	23	0.424755	0.175997	0.414348	0.585652
YDL137W	ARF2	21.4548	21	0.277207	0.131605	0.474753	0.525247
YDL138W	RGT2	0.864595	17		0.00530347	na	na
YDL139C	SCM3	0.384265	17	0.0903955	0.0023571	0.0260754	0.973925
YDL140C	RPO21	3.45838	33		0.0212139	na	na
YDL141W	BPL1	1.12077	39	0.0780473	0.00687486	0.0880858	0.911914
YDL142C	CRD1	1.05673	28		0.00648202	na	na
YDL143W	CCT4	18.3486	20	0.240372	0.112551	0.468238	0.531762
YDL144C		0.256176	12	0.198618	0.0015714	0.00791167	0.992088
YDL145C	COP1	3.45838	35	0.138681	0.0212139	0.152968	0.847032
YDL146W	LDB17	1.02471	37	0.089251	0.00628559	0.070426	0.929574
YDL147W	RPN5	8.87011	16	0.423051	0.0544096	0.128613	0.871387
YDL148C	NOP14	0.800551	10	0.131008	0.00491062	0.0374834	0.962517
YDL149W	ATG9	1.08875	37		0.00667844	na	na
YDL150W	RPC53	0.736507		0.0954682	0.00451777	0.0473222	0.952678
YDL151C	BUD30					na	na
YDL152W		0.128088	23		0.000785699	na	na
YDL153C	SAS10	2.7539	10	0.295517	0.0168925	0.0571626	0.942837
YDL154W	MSH5	0.32022	28	0.0456418	0.00196425	0.0430362	0.956964
YDL155W	CLB3	0.736507	12	0.079057	0.00451777	0.0571457	0.942854
YDL156W		0.32022			0.00196425	na	na
YDL157C			32			na	na
YDL158C			31			na	na
YDL159C-B						na	na
YDL159W	STE7		11	0.0746644		na	na
YDL159W-A		0.0640441			0.000392849	na	na
YDL160C	DHH1	2.14548	41		0.0131605	na	na
YDL160C-A		3.71456			0.0227853	na	na
YDL161W	ENT1	4.32298		0.235486	0.0265173	0.112607	0.887393
YDL162C		0.0640441	57	0.0379588	0.000392849	0.0103494	0.989651
YDL163W			18			na	na
YDL164C	CDC9	0.832573	22	0.105171	0.00510704	0.0485593	0.951441
YDL165W	CDC36	6.98081		0.0947411	0.0428206	0.451975	0.548025
YDL166C	FAP7	1.72919	11	0.201103	0.0106069	0.0527437	0.947256
YDL167C	NRP1	1.18482	5	0.231161	0.00726771	0.0314401	0.96856
YDL168W	SFA1	6.91676	53	0.170645	0.0424277	0.248632	0.751368
YDL169C	UGX2	0.608419			0.00373207	na	na
YDL170W	UGA3	0.672463	33		0.00412492	na	na
YDL171C	GLT1	3.65051	32	0.193696	0.0223924	0.115606	0.884394
YDL172C				0.13375		na	na
YDL173W			14	0.181001		na	na
YDL174C	DLD1	2.65783	26	0.167704	0.0163033	0.0972142	0.902786
YDL175C	AIR2	1.15279	40	0.17831	0.00707129	0.0396572	0.960343
YDL176W		0.32022		0.0679259	0.00196425	0.0289175	0.971082
YDL177C			45	0.0850197		na	na
YDL178W	DLD2		6	0.148527		na	na
YDL179W	PCL9	0.384265	23	0.1828	0.0023571	0.0128944	0.987106
YDL180W		2.08143	33	0.0468469	0.0127676	0.272539	0.727461
YDL181W	INH1	2.1775	26	0.122834	0.0133569	0.108739	0.891261
YDL182W	LYS20	2.65783	7	0.344482	0.0163033	0.0473269	0.952673
YDL183C		0.448309		0.0412867	0.00274995	0.0666061	0.933394
YDL184C	RPL41A		23			na	na
YDL185C-A		0.0640441			0.000392849	na	na
YDL185W	TFP1	16.5234	47	0.263223	0.101355	0.385055	0.614945
YDL186W		0.512353	52	0.175504	0.0031428	0.0179072	0.982093
YDL187C		0.0640441		0.129619	0.000392849	0.00303079	0.996969
YDL188C	PPH22	1.34493	19	0.178444	0.00824984	0.0462322	0.953768
YDL189W	RBS1	1.82526	10		0.0111962	na	na
YDL190C	UFD2	2.27357		0.0659789	0.0139462	0.211373	0.788627
YDL191W	RPL35A	33.7833	26	0.538393	0.207228	0.384901	0.615099
YDL192W	ARF1	40.732	17	0.345301	0.249852	0.723579	0.276421
YDL193W	NUS1	2.56176	34	0.118875	0.015714	0.132189	0.867811
YDL194W	SNF3	0.704485	40	0.0271231	0.00432134	0.159323	0.840677
YDL195W	SEC31	1.69717	41	0.142059	0.0104105	0.073283	0.926717
YDL196W		0.128088	35		0.000785699	na	na
YDL197C	ASF2	0.576397			0.00353564	na	na
YDL198C	GGC1	12.7768	9		0.0783735	na	na
YDL199C		0.192132	41	0.0208434	0.00117855	0.056543	0.943457
YDL200C	MGT1		41			na	na
YDL201W	TRM8		7	0.0949468		na	na
YDL202W	MRPL11	1.40897	10	0.103826	0.00864269	0.0832422	0.916758
YDL203C		0.640441		0.096677	0.00392849	0.0406353	0.959365
YDL204W	RTN2	0.640441	68	0.0617112	0.00392849	0.0636594	0.936341
YDL205C	HEM3	0.384265	21	0.163033	0.0023571	0.0144578	0.985542
YDL206W		1.53706		0.023049	0.00942839	0.409059	0.590941
YDL207W	GLE1	0.448309	6	0.147336	0.00274995	0.0186644	0.981336
YDL208W	NHP2	8.26169	6	0.465051	0.0506776	0.108972	0.891028
YDL209C	CWC2	0.288198		0.256619	0.00176782	0.00688889	0.993111
YDL210W	UGA4	0.128088		0.0441765	0.000785699	0.0177855	0.982215
YDL211C		0.0960661		0.087146	0.000589274	0.00676191	0.993238
YDL212W	SHR3	4.61117	14		0.0282852	na	na
YDL213C	NOP6	2.1775	11	0.166804	0.0133569	0.0800755	0.919925
YDL214C	PRR2	0.0640441			0.000392849	na	na
YDL215C	GDH2	0.928639	19	0.13472	0.00569632	0.0422825	0.957717
YDL216C	RRI1	0.32022		0.10716	0.00196425	0.01833	0.98167
YDL217C	TIM22	0.512353	12	0.104669	0.0031428	0.030026	0.969974
YDL218W		0.256176	36	0.0349113	0.0015714	0.0450112	0.954989
YDL219W	DTD1	3.17018	33	0.0630799	0.019446	0.308277	0.691723
YDL220C	CDC13		44	0.0801612		na	na
YDL221W				0.145264		na	na
YDL222C	FMP45	0.0960661	86	0.0290566	0.000589274	0.0202802	0.97972
YDL223C	HBT1	0.192132		0.101691	0.00117855	0.0115895	0.988411
YDL224C	WHI4	0.32022	17	0.128234	0.00196425	0.0153177	0.984682
YDL225W	SHS1	4.03478	5	0.113725	0.0247495	0.217627	0.782373
YDL226C	GCS1	1.21684	14	0.284716	0.00746414	0.0262161	0.973784
YDL227C	HO	0.0640441			0.000392849	na	na
YDL228C			33			na	na
YDL229W	SSB1			0.222806		na	na
YDL230W	PTP1	1.76121	18	0.179734	0.0108034	0.0601076	0.939892
YDL231C	BRE4	1.34493	23	0.119758	0.00824984	0.0688874	0.931113
YDL232W	OST4	11.2718	21		0.0691415	na	na
YDL233W		0.448309	25	0.0582828	0.00274995	0.0471828	0.952817
YDL234C	GYP7	2.91401	46		0.0178746	na	na
YDL235C	YPD1	5.15555	26	0.119927	0.0316244	0.263696	0.736304
YDL236W	PHO13	10.9515	16	0.160605	0.0671773	0.418275	0.581725
YDL237W		3.93871	23	0.127502	0.0241602	0.189489	0.810511
YDL238C	GUD1	0.672463		0.0857656	0.00412492	0.0480953	0.951905
YDL239C	ADY3	0.544375	32	0.0397119	0.00333922	0.084086	0.915914
YDL240C-A		0.0640441			0.000392849	na	na
YDL240W	LRG1	0.480331			0.00294637	na	na
YDL241W		2.78592		0.242918	0.0170889	0.0703487	0.929651
YDL242W		0.0640441	21	0.0541271	0.000392849	0.00725791	0.992742
YDL243C	AAD4			0.137755		na	na
YDL244W	THI13		25	0.0502393		na	na
YDL245C	HXT15			0.0192243		na	na
YDL246C	SOR2			0.0620613		na	na
YDL247W	MPH2		33	0.0356392		na	na
YDL247W-A						na	na
YDL248W	COS7		21			na	na
YDR001C	NTH1	2.49772			0.0153211	na	na
YDR002W	YRB1	27.571	32	0.498028	0.169122	0.339583	0.660417
YDR003W	RCR2		21	0.117863		na	na
YDR003W-A		1.47301			0.00903554	na	na
YDR004W	RAD57	2.04941		0.0962377	0.0125712	0.130626	0.869374
YDR005C	MAF1	1.66515		0.159412	0.0102141	0.0640735	0.935927
YDR006C	SOK1	3.13816	34	0.165772	0.0192496	0.116121	0.883879
YDR007W	TRP1		21	0.0724038		na	na
YDR008C				0.124987		na	na
YDR009W	GAL3			0.0443255		na	na
YDR010C			96	0.0400106		na	na
YDR011W	SNQ2	6.91676	32		0.0424277	na	na
YDR012W	RPL4B	37.0815	8		0.22746	na	na
YDR013W	PSF1	3.07412	22		0.0188568	na	na
YDR014W	RAD61	0.288198	23		0.00176782	na	na
YDR014W-A	HED1					na	na
YDR015C			20	0.0214479		na	na
YDR016C	DAD1	2.65783	50		0.0163033	na	na
YDR017C	KCS1	2.52974	22	0.22755	0.0155176	0.0681941	0.931806
YDR018C		0.512353	36	0.0792828	0.0031428	0.0396403	0.96036
YDR019C	GCV1	6.69261		0.141915	0.0410528	0.289276	0.710724
YDR020C		0.544375		0.114067	0.00333922	0.0292742	0.970726
YDR021W	FAL1		33	0.112757		na	na
YDR022C	CIS1		29	0.0641612		na	na
YDR023W	SES1	24.3368	33	0.268595	0.149283	0.555791	0.444209
YDR024W	FYV1					na	na
YDR025W	RPS11A	82.841	27	0.327761	0.508151	1	0
YDR026C		1.15279		0.17799	0.00707129	0.0397285	0.960271
YDR027C	VPS54	0.704485	36	0.0683511	0.00432134	0.0632227	0.936777
YDR028C	REG1	2.27357	28		0.0139462	na	na
YDR029W		0.192132	51		0.00117855	na	na
YDR030C	RAD28	0.704485	52		0.00432134	na	na
YDR031W		3.2022	19		0.0196425	na	na
YDR032C	PST2	15.2425	119	0.0785435	0.0934982	1	0
YDR033W	MRH1	32.5664	32	0.527788	0.199764	0.378492	0.621508
YDR034C	LYS14	1.82526	23	0.111896	0.0111962	0.100059	0.899941
YDR034C-A						na	na
YDR034W-B		4.80331			0.0294637	na	na
YDR035W	ARO3	4.83533	19	0.227957	0.0296601	0.130113	0.869887
YDR036C	EHD3	0.864595	26		0.00530347	na	na
YDR037W	KRS1	15.7548	22	0.516074	0.096641	0.187262	0.812738
YDR038C	ENA5	0.416287	19		0.00255352	na	na
YDR039C	ENA2		27	0.090107		na	na
YDR040C	ENA1		17			na	na
YDR041W	RSM10	2.91401	17	0.114171	0.0178746	0.156561	0.843439
YDR042C		0.0640441	70		0.000392849	na	na
YDR043C	NRG1	0.928639		0.147354	0.00569632	0.0386574	0.961343
YDR044W	HEM13	7.01283	11	0.301131	0.043017	0.142852	0.857148
YDR045C	RPC11	5.86003	10	0.210202	0.0359457	0.171006	0.828994
YDR046C	BAP3	12.6167	4	0.31398	0.0773913	0.246485	0.753515
YDR047W	HEM12	4.80331	10	0.41841	0.0294637	0.0704182	0.929582
YDR048C		0.448309	18		0.00274995	na	na
YDR049W		0.896617	10	0.102236	0.00549989	0.0537959	0.946204
YDR050C	TPI1	204.237	32	0.86236	1.2528	1	0
YDR051C		0.928639	16	0.239365	0.00569632	0.0237976	0.976202
YDR052C	DBF4	0.800551			0.00491062	na	na
YDR053W			21	0.0777669		na	na
YDR054C	CDC34	1.8893	15	0.22071	0.0115891	0.0525082	0.947492
YDR055W	PST1	5.73195	20	0.152433	0.03516	0.230659	0.769341
YDR056C		3.17018	15	0.139358	0.019446	0.13954	0.86046
YDR057W	YOS9	1.08875		0.0740328	0.00667844	0.0902092	0.909791
YDR058C	TGL2	0.416287	17	0.0261734	0.00255352	0.0975617	0.902438
YDR059C	UBC5	2.30559	20	0.053332	0.0141426	0.26518	0.73482
YDR060W	MAK21	4.70724			0.0288744	na	na
YDR061W		2.1775	11	0.211981	0.0133569	0.0630099	0.93699
YDR062W	LCB2	3.84265	17	0.169185	0.023571	0.139321	0.860679
YDR063W		2.68985	43	0.138683	0.0164997	0.118974	0.881026
YDR064W	RPS13	76.4686	31	2.12463	0.469062	0.220774	0.779226
YDR065W		0.192132		0.190994	0.00117855	0.00617061	0.993829
YDR066C		1.21684	27		0.00746414	na	na
YDR067C		1.21684	26	0.0859249	0.00746414	0.0868682	0.913132
YDR068W	DOS2	1.66515	10	0.151629	0.0102141	0.0673623	0.932638
YDR069C	DOA4	0.384265		0.0675754	0.0023571	0.034881	0.965119
YDR070C		1.24886			0.00766056	na	na
YDR071C	PAA1	12.8088	14	0.160666	0.0785699	0.489025	0.510975
YDR072C	IPT1	3.52243	29	0.248621	0.0216067	0.0869062	0.913094
YDR073W	SNF11	2.43368		0.318823	0.0149283	0.0468231	0.953177
YDR074W	TPS2	3.17018		0.135373	0.019446	0.143648	0.856352
YDR075W	PPH3	0.768529	17	0.0655473	0.00471419	0.0719204	0.92808
YDR076W	RAD55	0.128088		0.0783722	0.000785699	0.0100252	0.989975
YDR077W	SED1	84.7303	89	0.678857	0.51974	0.76561	0.23439
YDR078C	SHU2	0.832573	32	0.0826857	0.00510704	0.0617645	0.938235
YDR079C-A	TFB5	2.97805			0.0182675	na	na
YDR079W	PET100	2.20952	28	0.131028	0.0135533	0.103438	0.896562
YDR080W	VPS41	1.66515	26		0.0102141	na	na
YDR081C	PDC2	1.02471	21	0.105523	0.00628559	0.0595658	0.940434
YDR082W	STN1	0.608419	25	0.0642137	0.00373207	0.0581195	0.94188
YDR083W	RRP8	2.30559		0.191733	0.0141426	0.0737619	0.926238
YDR084C	TVP23	2.36963	17	0.045948	0.0145354	0.316345	0.683655
YDR085C	AFR1	1.66515	42	0.0540104	0.0102141	0.189113	0.810887
YDR086C	SSS1	48.5454	12	0.18619	0.29778	1	0
YDR087C	RRP1	1.79323	11	0.210174	0.0109998	0.0523366	0.947663
YDR088C	SLU7	1.37695		0.183363	0.00844626	0.0460631	0.953937
YDR089W		1.15279		0.0575802	0.00707129	0.122808	0.877192
YDR090C		1.3129	16	0.0907448	0.00805341	0.088748	0.911252
YDR091C	RLI1	2.1775	10	0.177234	0.0133569	0.0753629	0.924637
YDR092W	UBC13	5.6679	19	0.279374	0.0347672	0.124447	0.875553
YDR093W	DNF2		23	0.0780067		na	na
YDR094W			14	0.200572		na	na
YDR095C			44			na	na
YDR096W	GIS1	0.800551	17	0.065564	0.00491062	0.0748981	0.925102
YDR097C	MSH6	1.18482		0.0905815	0.00726771	0.080234	0.919766
YDR098C	GRX3	7.65327	15	0.0826411	0.0469455	0.568065	0.431935
YDR099W	BMH2	11.2718	20	0.116111	0.0691415	0.595478	0.404522
YDR100W	TVP15	4.57915	10	0.0756482	0.0280887	0.371307	0.628693
YDR101C	ARX1	2.52974	10	0.181228	0.0155176	0.0856243	0.914376
YDR102C		0.0640441	31		0.000392849	na	na
YDR103W	STE5		14			na	na
YDR104C	SPO71		19	0.0515738		na	na
YDR105C	TMS1	1.37695	12	0.0723868	0.00844626	0.116682	0.883318
YDR106W	ARP10	0.0640441	21	0.052326	0.000392849	0.00750772	0.992492
YDR107C		0.224154		0.0419463	0.00137497	0.0327794	0.967221
YDR108W	GSG1	0.32022	24	0.0600625	0.00196425	0.0327034	0.967297
YDR109C		0.256176			0.0015714	na	na
YDR110W	FOB1	0.192132	19	0.169433	0.00117855	0.00695582	0.993044
YDR111C		1.12077		0.08699	0.00687486	0.0790305	0.920969
YDR112W				0.0785608		na	na
YDR113C	PDS1	0.608419		0.139338	0.00373207	0.0267843	0.973216
YDR114C		0.192132	20		0.00117855	na	na
YDR115W		2.62581	20	0.17666	0.0161068	0.0911741	0.908826
YDR116C	MRPL1	2.27357	13	0.13555	0.0139462	0.102885	0.897115
YDR117C	TMA64	1.02471	17	0.0630267	0.00628559	0.099729	0.900271
YDR118W	APC4		31	0.0798933		na	na
YDR118W-A						na	na
YDR119W		2.24154	11	0.147502	0.0137497	0.0932171	0.906783
YDR119W-A		0.704485			0.00432134	na	na
YDR120C	TRM1	1.72919	8	0.12631	0.0106069	0.0839757	0.916024
YDR121W	DPB4	1.34493	8	0.139392	0.00824984	0.0591844	0.940816
YDR122W	KIN1	1.6011	21	0.0926914	0.00982124	0.105956	0.894044
YDR123C	INO2	0.288198			0.00176782	na	na
YDR124W		0.416287	25	0.0431423	0.00255352	0.0591883	0.940812
YDR125C	ECM18	0.448309		0.0456485	0.00274995	0.0602417	0.939758
YDR126W	SWF1	0.224154	26	0.172913	0.00137497	0.0079518	0.992048
YDR127W	ARO1	2.62581	37	0.125548	0.0161068	0.128292	0.871708
YDR128W		0.960661		0.123357	0.00589274	0.0477698	0.95223
YDR129C	SAC6	14.9543	62	0.219238	0.0917303	0.418406	0.581594
YDR130C	FIN1	0.736507	17	0.1039	0.00451777	0.0434819	0.956518
YDR131C		0.800551	18	0.0265216	0.00491062	0.185155	0.814845
YDR132C		0.640441	32	0.110662	0.00392849	0.0354999	0.9645
YDR133C		26.5463		0.41877	0.162836	0.388844	0.611156
YDR135C	YCF1	5.79599	34		0.0355529	na	na
YDR136C	VPS61	0.0640441	40		0.000392849	na	na
YDR137W	RGP1	3.23423	22	0.0905514	0.0198389	0.21909	0.78091
YDR138W	HPR1	0.928639			0.00569632	na	na
YDR139C	RUB1	3.7786	37		0.0231781	na	na
YDR140W	MTQ2		18	0.107318		na	na
YDR141C	DOP1		29			na	na
YDR142C	PEX7	0.576397	26	0.158135	0.00353564	0.0223583	0.977642
YDR143C	SAN1	0.288198	15	0.197383	0.00176782	0.00895629	0.991044
YDR144C	MKC7	0.640441		0.0995469	0.00392849	0.0394637	0.960536
YDR145W	TAF12	1.50504	11	0.318419	0.00923196	0.0289931	0.971007
YDR146C	SWI5	0.640441	8	0.0863067	0.00392849	0.0455178	0.954482
YDR147W	EKI1	1.15279			0.00707129	na	na
YDR148C	KGD2	4.45106	30	0.0932539	0.027303	0.292782	0.707218
YDR149C			22	0.0692584		na	na
YDR150W	NUM1	1.69717		0.133784	0.0104105	0.0778158	0.922184
YDR151C	CTH1	6.46845	14	0.233927	0.0396778	0.169616	0.830384
YDR152W	GIR2	2.20952		0.309375	0.0135533	0.0438086	0.956191
YDR153C	ENT5	0.960661		0.327404	0.00589274	0.0179984	0.982002
YDR154C		313.496	30	0.448947	1.923	1	0
YDR155C	CPR1		34	0.221523		na	na
YDR156W	RPA14		6	0.504777		na	na
YDR157W				0.194234		na	na
YDR158W	HOM2	15.2745		0.340771	0.0936946	0.274949	0.725051
YDR159W	SAC3	1.37695			0.00844626	na	na
YDR160W	SSY1	0.480331		0.0569092	0.00294637	0.0517732	0.948227
YDR161W		2.84996		0.26674	0.0174818	0.0655387	0.934461
YDR162C	NBP2	2.04941		0.0815208	0.0125712	0.154208	0.845792
YDR163W	CWC15		21	0.121715		na	na
YDR164C	SEC1		28	0.0678829		na	na
YDR165W	TRM82	2.56176			0.015714	na	na
YDR166C	SEC5	0.448309	42	0.0774036	0.00274995	0.0355274	0.964473
YDR167W	TAF10	1.92132	9	0.157779	0.0117855	0.0746962	0.925304
YDR168W	CDC37	4.41904	64	0.178976	0.0271066	0.151454	0.848546
YDR169C	STB3	0.736507	22	0.164637	0.00451777	0.0274408	0.972559
YDR169C-A		0.0640441			0.000392849	na	na
YDR170C	SEC7	4.355	29	0.13054	0.0267138	0.204641	0.795359
YDR171W	HSP42	17.0678			0.104694	na	na
YDR172W	SUP35	3.90669	12	0.440649	0.0239638	0.054383	0.945617
YDR173C	ARG82	0.576397	30	0.227311	0.00353564	0.0155542	0.984446
YDR174W	HMO1	15.2425	16	0.397072	0.0934982	0.235469	0.764531
YDR175C	RSM24	2.33761	8	0.173373	0.014339	0.0827063	0.917294
YDR176W	NGG1	1.21684	17	0.19464	0.00746414	0.0383485	0.961651
YDR177W	UBC1	13.9936	19	0.109137	0.0858376	0.786514	0.213486
YDR178W	SDH4	7.8454	33	0.041493	0.0481241	1	0
YDR179C	CSN9	1.15279	28	0.0381658	0.00707129	0.185278	0.814722
YDR179W-A		0.704485	14		0.00432134	na	na
YDR180W	SCC2	2.01739	22		0.0123748	na	na
YDR181C	SAS4	1.08875	12	0.0954493	0.00667844	0.0699685	0.930032
YDR182W	CDC1		19	0.15786		na	na
YDR182W-A						na	na
YDR183C-A		1.21684			0.00746414	na	na
YDR183W	PLP1	1.37695	21	0.093911	0.00844626	0.089939	0.910061
YDR184C	ATC1					na	na
YDR185C		1.21684	28	0.192025	0.00746414	0.0388707	0.961129
YDR186C		1.02471			0.00628559	na	na
YDR187C		0.0640441	11	0.646768	0.000392849	0.000607404	0.999393
YDR188W	CCT6	5.31566	8	0.439253	0.0326065	0.0742317	0.925768
YDR189W	SLY1	1.92132	13	0.118164	0.0117855	0.0997386	0.900261
YDR190C	RVB1	9.54257	12	0.300264	0.0585346	0.194944	0.805056
YDR191W	HST4	0.384265		0.077131	0.0023571	0.0305597	0.96944
YDR192C	NUP42	0.608419	21	0.138811	0.00373207	0.026886	0.973114
YDR193W				0.0846316		na	na
YDR194C	MSS116	4.13084	9	0.197709	0.0253388	0.128162	0.871838
YDR194W-A		0.0640441			0.000392849	na	na
YDR195W	REF2		18			na	na
YDR196C				0.160244		na	na
YDR197W	CBS2	0.864595		0.0995112	0.00530347	0.0532952	0.946705
YDR198C		0.992683		0.0730147	0.00608917	0.0833964	0.916604
YDR199W						na	na
YDR200C	VPS64			0.0683543		na	na
YDR201W	SPC19			0.0718657		na	na
YDR202C	RAV2		37	0.185064		na	na
YDR203W			31	0.0883418		na	na
YDR204W	COQ4	1.56908	70	0.208588	0.00962481	0.0461426	0.953857
YDR205W	MSC2	0.32022	17		0.00196425	na	na
YDR206W	EBS1	0.704485	15	0.0952213	0.00432134	0.0453821	0.954618
YDR207C	UME6	0.992683	17	0.0896376	0.00608917	0.0679309	0.932069
YDR208W	MSS4	1.08875		0.192434	0.00667844	0.0347051	0.965295
YDR209C			25	0.267757		na	na
YDR210W			30	0.462922		na	na
YDR211W	GCD6	1.24886	11	0.20212	0.00766056	0.037901	0.962099
YDR212W	TCP1	3.93871		0.152534	0.0241602	0.158392	0.841608
YDR213W	UPC2	0.896617			0.00549989	na	na
YDR214W	AHA1	3.26625	116	0.516085	0.0200353	0.0388217	0.961178
YDR215C		0.0640441	79		0.000392849	na	na
YDR216W	ADR1	0.672463	47	0.0342095	0.00412492	0.120578	0.879422
YDR217C	RAD9	1.82526	15	0.0716688	0.0111962	0.156222	0.843778
YDR218C	SPR28	0.128088		0.0170441	0.000785699	0.0460979	0.953902
YDR219C	MFB1	1.05673			0.00648202	na	na
YDR220C		0.448309			0.00274995	na	na
YDR221W	GTB1	0.512353	16	0.118396	0.0031428	0.0265449	0.973455
YDR222W		1.34493	29	0.0607098	0.00824984	0.13589	0.86411
YDR223W	CRF1	0.32022		0.052883	0.00196425	0.0371433	0.962857
YDR224C	HTB1	34.808	7	0.927875	0.213514	0.23011	0.76989
YDR225W	HTA1	31.0934	6	1.09803	0.190728	0.173701	0.826299
YDR226W	ADK1	27.7311	27	0.361184	0.170104	0.470962	0.529038
YDR227W	SIR4	0.928639	18	0.106596	0.00569632	0.0534384	0.946562
YDR228C	PCF11	0.704485	15		0.00432134	na	na
YDR229W	IVY1		10	0.182273		na	na
YDR230W			32	0.0712857		na	na
YDR231C	COX20		12	0.0584942		na	na
YDR232W	HEM1	1.40897	10	0.324483	0.00864269	0.0266353	0.973365
YDR233C	RTN1	7.62125	10	0.284605	0.0467491	0.164259	0.835741
YDR234W	LYS4	0.832573	12	0.135868	0.00510704	0.0375883	0.962412
YDR235W	PRP42		33			na	na
YDR236C	FMN1		23	0.0667022		na	na
YDR237W	MRPL7	2.11346	19	0.0827439	0.012964	0.156677	0.843323
YDR238C	SEC26	5.41173	38		0.0331958	na	na
YDR239C		0.608419	20		0.00373207	na	na
YDR240C	SNU56	2.01739	30		0.0123748	na	na
YDR241W	BUD26	4.19489			0.0257316	na	na
YDR242W	AMD2		25	0.120544		na	na
YDR243C	PRP28			0.0976691		na	na
YDR244W	PEX5	0.0640441	37		0.000392849	na	na
YDR245W	MNN10	2.30559	14		0.0141426	na	na
YDR246W	TRS23	0.640441	19		0.00392849	na	na
YDR246W-A		0.128088			0.000785699	na	na
YDR247W	VHS1	0.768529	50		0.00471419	na	na
YDR248C		5.09151	31	0.119315	0.0312315	0.261758	0.738242
YDR249C		0.256176		0.122069	0.0015714	0.0128731	0.987127
YDR250C		0.0640441			0.000392849	na	na
YDR251W	PAM1	1.12077	10	0.126605	0.00687486	0.0543015	0.945698
YDR252W	BTT1	0.512353	38		0.0031428	na	na
YDR253C	MET32	2.68985	12	0.0852575	0.0164997	0.193527	0.806473
YDR254W	CHL4			0.0716707		na	na
YDR255C	RMD5		42	0.0700068		na	na
YDR256C	CTA1	0.0640441		0.0942052	0.000392849	0.00417015	0.99583
YDR257C	SET7	1.12077	94	0.193858	0.00687486	0.0354634	0.964537
YDR258C	HSP78	13.8976			0.0852483	na	na
YDR259C	YAP6	0.512353			0.0031428	na	na
YDR260C	SWM1	0.448309	33	0.174424	0.00274995	0.0157659	0.984234
YDR261C	EXG2	1.50504	22	0.130842	0.00923196	0.0705581	0.929442
YDR262W		1.28088	31	0.110116	0.00785699	0.0713518	0.928648
YDR263C	DIN7	0.448309			0.00274995	na	na
YDR264C	AKR1	3.33029	16	0.354825	0.0204282	0.0575725	0.942427
YDR265W	PEX10	0.928639	26	0.186458	0.00569632	0.0305502	0.96945
YDR266C		1.44099	20	0.122969	0.00883911	0.0718808	0.928119
YDR267C	CIA1	1.82526	8	0.198909	0.0111962	0.0562882	0.943712
YDR268W	MSW1	0.608419	13	0.125854	0.00373207	0.029654	0.970346
YDR269C			31			na	na
YDR270W	CCC2		15			na	na
YDR271C			23	0.153698		na	na
YDR272W	GLO2	3.90669	21	0.1278	0.0239638	0.18751	0.81249
YDR273W	DON1	0.352243	90	0.0879241	0.00216067	0.0245743	0.975426
YDR274C		0.128088		0.524001	0.000785699	0.00149942	0.998501
YDR275W	BSC2	0.576397		0.360824	0.00353564	0.00979879	0.990201
YDR276C	PMP3	49.6982	13		0.304851	na	na
YDR277C	MTH1	0.416287	41	0.223943	0.00255352	0.0114026	0.988597
YDR278C		0.0640441			0.000392849	na	na
YDR279W	RNH202	1.6011		0.148372	0.00982124	0.0661933	0.933807
YDR280W	RRP45	1.72919		0.188423	0.0106069	0.0562933	0.943707
YDR281C	PHM6	0.832573		0.178005	0.00510704	0.0286905	0.97131
YDR282C		0.32022	31	0.0389898	0.00196425	0.0503785	0.949621
YDR283C	GCN2	0.512353			0.0031428	na	na
YDR284C	DPP1	5.05948	26	0.0950363	0.0310351	0.326561	0.673439
YDR285W	ZIP1	0.384265			0.0023571	na	na
YDR286C		1.47301			0.00903554	na	na
YDR287W		0.32022		0.0374425	0.00196425	0.0524604	0.94754
YDR288W	NSE3	2.24154	14	0.156547	0.0137497	0.0878312	0.912169
YDR289C	RTT103	2.49772	10	0.176841	0.0153211	0.0866379	0.913362
YDR290W						na	na
YDR291W		0.704485	19		0.00432134	na	na
YDR292C	SRP101	6.59654	11	0.152825	0.0404635	0.264769	0.735231
YDR293C	SSD1	3.2022	21	0.188313	0.0196425	0.104307	0.895693
YDR294C	DPL1	2.59379	29	0.284167	0.0159104	0.0559896	0.94401
YDR295C	HDA2	0.512353		0.0925307	0.0031428	0.0339649	0.966035
YDR296W	MHR1	2.24154			0.0137497	na	na
YDR297W	SUR2	3.2022	8	0.381398	0.0196425	0.0515013	0.948499
YDR298C	ATP5	5.25162	13		0.0322137	na	na
YDR299W	BFR2	1.34493	7	0.321288	0.00824984	0.0256774	0.974323
YDR300C	PRO1	0.928639	12		0.00569632	na	na
YDR301W	CFT1	0.992683		0.0863211	0.00608917	0.0705409	0.929459
YDR302W	GPI11	0.768529	16	0.0310299	0.00471419	0.151924	0.848076
YDR303C	RSC3	0.576397	15	0.0531554	0.00353564	0.0665152	0.933485
YDR304C	CPR5	11.1757	34	0.128382	0.0685522	0.53397	0.46603
YDR305C	HNT2	2.59379		0.113976	0.0159104	0.139595	0.860405
YDR306C		0.800551		0.0617106	0.00491062	0.0795749	0.920425
YDR307W		1.44099		0.0550236	0.00883911	0.160642	0.839358
YDR308C	SRB7	1.82526	15	0.086346	0.0111962	0.129667	0.870333
YDR309C	GIC2	3.39434	10	0.168571	0.020821	0.123515	0.876485
YDR310C	SUM1	1.47301			0.00903554	na	na
YDR311W	TFB1	2.14548		0.150519	0.0131605	0.0874341	0.912566
YDR312W	SSF2	2.08143	10	0.132521	0.0127676	0.0963442	0.903656
YDR313C	PIB1	0.768529	26	0.114436	0.00471419	0.0411952	0.958805
YDR314C		0.384265		0.0857005	0.0023571	0.0275039	0.972496
YDR315C	IPK1	0.448309	31	0.0398377	0.00274995	0.0690287	0.930971
YDR316W	OMS1	0.544375	20	0.167646	0.00333922	0.0199182	0.980082
YDR317W	HIM1	0.16011		0.0322518	0.000982124	0.0304518	0.969548
YDR318W	MCM21			0.0670758		na	na
YDR319C			44	0.121727		na	na
YDR320C	SWA2	0.832573		0.0886341	0.00510704	0.0576194	0.942381
YDR320C-A	DAD4	5.28364		0.264816	0.0324101	0.122387	0.877613
YDR320W-B						na	na
YDR321W	ASP1	4.89937	21	0.139638	0.030053	0.215221	0.784779
YDR322C-A	TIM11	2.33761			0.014339	na	na
YDR322W	MRPL35	1.53706		0.172593	0.00942839	0.054628	0.945372
YDR323C	PEP7	0.256176		0.050641	0.0015714	0.0310302	0.96897
YDR324C	UTP4	2.65783		0.242134	0.0163033	0.0673315	0.932669
YDR325W	YCG1	0.256176		0.101241	0.0015714	0.0155214	0.984479
YDR326C	YSP2	0.0960661		0.185746	0.000589274	0.00317246	0.996828
YDR327W				0.101315		na	na
YDR328C	SKP1		29	0.196132		na	na
YDR329C	PEX3	1.92132		0.0617288	0.0117855	0.190924	0.809076
YDR330W	UBX5	1.66515		0.082099	0.0102141	0.124412	0.875588
YDR331W	GPI8	1.15279		0.0642734	0.00707129	0.110019	0.889981
YDR332W		1.37695		0.0640642	0.00844626	0.131841	0.868159
YDR333C		2.20952		0.102531	0.0135533	0.132188	0.867812
YDR334W	SWR1	0.704485		0.211933	0.00432134	0.0203901	0.97961
YDR335W	MSN5	4.41904		0.19442	0.0271066	0.139423	0.860577
YDR336W		0.960661		0.0899744	0.00589274	0.0654936	0.934506
YDR337W	MRPS28	1.40897	13	0.207989	0.00864269	0.0415535	0.958447
YDR338C		0.224154		0.0668208	0.00137497	0.020577	0.979423
YDR339C	FCF1	3.2022		0.148078	0.0196425	0.132649	0.867351
YDR340W						na	na
YDR341C		5.86003	29	0.30785	0.0359457	0.116764	0.883236
YDR342C	HXT7		59	0.0484863		na	na
YDR343C	HXT6		56			na	na
YDR344C		0.0640441	24	0.0816804	0.000392849	0.00480959	0.99519
YDR345C	HXT3	14.7301	25	0.308508	0.0903554	0.292879	0.707121
YDR346C	SVF1	5.50779	8	0.263367	0.033785	0.128281	0.871719
YDR347W	MRP1	3.2022	14	0.12044	0.0196425	0.163089	0.836911
YDR348C		2.59379		0.258648	0.0159104	0.0615137	0.938486
YDR349C	YPS7	4.25893		0.129109	0.0261245	0.202345	0.797655
YDR350C	TCM10	0.704485		0.0971243	0.00432134	0.0444929	0.955507
YDR351W	SBE2	1.21684		0.138136	0.00746414	0.0540345	0.945965
YDR352W		0.608419		0.235481	0.00373207	0.0158487	0.984151
YDR353W	TRR1	16.5554	15	0.280568	0.101552	0.36195	0.63805
YDR354C-A						na	na
YDR354W	TRP4	2.84996	9	0.102058	0.0174818	0.171293	0.828707
YDR355C						na	na
YDR356W	SPC110	0.480331	15		0.00294637	na	na
YDR357C		3.93871			0.0241602	na	na
YDR358W	GGA1	0.512353	88	0.12014	0.0031428	0.0261595	0.97384
YDR359C	VID21	0.480331	12	0.125582	0.00294637	0.0234617	0.976538
YDR360W	OPI7			0.0757808		na	na
YDR361C	BCP1	1.76121	8	0.138484	0.0108034	0.0780118	0.921988
YDR362C	TFC6	1.02471		0.0923308	0.00628559	0.0680769	0.931923
YDR363W	ESC2	0.608419			0.00373207	na	na
YDR363W-A	SEM1	7.14092			0.0438027	na	na
YDR364C	CDC40	0.480331			0.00294637	na	na
YDR365C	ESF1	11.56	9		0.0709093	na	na
YDR366C			56	0.0223528		na	na
YDR367W		4.73926	23	0.0415374	0.0290709	0.699872	0.300128
YDR368W	YPR1	2.11346	44		0.012964	na	na
YDR369C	XRS2	0.832573		0.0423895	0.00510704	0.120479	0.879521
YDR370C		2.33761			0.014339	na	na
YDR371C-A						na	na
YDR371W	CTS2	3.4904	23	0.0887356	0.0214103	0.241282	0.758718
YDR372C	VPS74	7.17294		0.225044	0.0439991	0.195514	0.804486
YDR373W	FRQ1	4.19489	22	0.138045	0.0257316	0.186401	0.813599
YDR374C		0.256176			0.0015714	na	na
YDR374W-A		1.82526			0.0111962	na	na
YDR375C	BCS1	1.37695		0.0836306	0.00844626	0.100995	0.899005
YDR376W	ARH1	0.864595			0.00530347	na	na
YDR377W	ATP17	4.83533	17		0.0296601	na	na
YDR378C	LSM6	8.74202		0.178413	0.0536239	0.300561	0.699439
YDR379C-A						na	na
YDR379W	RGA2		20			na	na
YDR380W	ARO10	0.384265			0.0023571	na	na
YDR381C-A		2.14548		0.108282	0.0131605	0.121539	0.878461
YDR381W	YRA1	6.88474			0.0422313	na	na
YDR382W	RPP2B	72.4339	24	1.12418	0.444313	0.395234	0.604766
YDR383C	NKP1	4.67522		0.110615	0.028678	0.259259	0.740741
YDR384C	ATO3	1.79323	21	0.0747965	0.0109998	0.147063	0.852937
YDR385W	EFT2		34	0.299711		na	na
YDR386W	MUS81	0.832573		0.0675945	0.00510704	0.0755541	0.924446
YDR387C		1.08875	28	0.0684719	0.00667844	0.0975355	0.902464
YDR388W	RVS167	5.98812	51	0.210438	0.0367314	0.174548	0.825452
YDR389W	SAC7	0.704485		0.154673	0.00432134	0.0279386	0.972061
YDR390C	UBA2	4.89937	10	0.0908521	0.030053	0.33079	0.66921
YDR391C		2.1775		0.169217	0.0133569	0.0789335	0.921066
YDR392W	SPT3	1.34493		0.223015	0.00824984	0.0369922	0.963008
YDR393W	SHE9	1.18482	14		0.00726771	na	na
YDR394W	RPT3	6.94878	14	0.234915	0.0426242	0.181445	0.818555
YDR395W	SXM1	2.81794	25	0.18384	0.0172854	0.0940241	0.905976
YDR396W				0.353371		na	na
YDR397C	NCB2			0.69076		na	na
YDR398W	UTP5	2.36963	8	0.297584	0.0145354	0.0488449	0.951155
YDR399W	HPT1	9.95886		0.424952	0.0610881	0.143753	0.856247
YDR400W	URH1	1.12077		0.132502	0.00687486	0.051885	0.948115
YDR401W			95	0.0208899		na	na
YDR402C	DIT2					na	na
YDR403W	DIT1	0.192132	54		0.00117855	na	na
YDR404C	RPB7	3.74658	11		0.0229817	na	na
YDR405W	MRP20	1.69717		0.103121	0.0104105	0.100955	0.899045
YDR406W	PDR15		37	0.04129		na	na
YDR406W-A						na	na
YDR407C	TRS120		15	0.0463431		na	na
YDR408C	ADE8	3.97073	12	0.245069	0.0243567	0.0993869	0.900613
YDR409W	SIZ1	0.512353	32	0.0776756	0.0031428	0.0404605	0.959539
YDR410C	STE14	2.04941		0.109217	0.0125712	0.115103	0.884897
YDR411C	DFM1	1.47301	16	0.305508	0.00903554	0.0295755	0.970425
YDR412W				0.172223		na	na
YDR413C			7	0.086177		na	na
YDR414C	ERD1	2.11346		0.089505	0.012964	0.144841	0.855159
YDR415C		0.704485	14	0.240739	0.00432134	0.0179503	0.98205
YDR416W	SYF1	1.6011		0.145872	0.00982124	0.0673278	0.932672
YDR417C			26	0.521779		na	na
YDR418W	RPL12B	45.055	23	0.378894	0.27637	0.729412	0.270588
YDR419W	RAD30	0.128088		0.0583196	0.000785699	0.0134723	0.986528
YDR420W	HKR1	0.512353		0.142755	0.0031428	0.0220153	0.977985
YDR421W	ARO80	2.04941	26	0.0865814	0.0125712	0.145195	0.854805
YDR422C	SIP1	1.15279	19	0.110717	0.00707129	0.0638682	0.936132
YDR423C	CAD1	1.56908	12	0.178972	0.00962481	0.0537784	0.946222
YDR424C	DYN2	4.80331		0.204023	0.0294637	0.144414	0.855586
YDR425W	SNX41					na	na
YDR426C						na	na
YDR427W	RPN9		19	0.182572		na	na
YDR428C				0.0838772		na	na
YDR429C	TIF35	18.829	8	0.433171	0.115498	0.266633	0.733367
YDR430C	CYM1	0.192132	31		0.00117855	na	na
YDR431W						na	na
YDR432W	NPL3		28	0.325724		na	na
YDR433W			34	0.670621		na	na
YDR434W	GPI17	5.50779		0.0510129	0.033785	0.662284	0.337716
YDR435C	PPM1	1.24886	21	0.122052	0.00766056	0.0627645	0.937235
YDR436W	PPZ2	0.416287		0.0999456	0.00255352	0.0255491	0.974451
YDR437W	GPI19	0.448309		0.161967	0.00274995	0.0169784	0.983022
YDR438W		0.256176		0.136971	0.0015714	0.0114725	0.988528
YDR439W	LRS4	0.512353		0.134491	0.0031428	0.0233681	0.976632
YDR440W	DOT1	0.768529	10	0.0677529	0.00471419	0.0695792	0.930421
YDR441C	APT2	1.05673	8	0.314212	0.00648202	0.0206295	0.979371
YDR442W				0.140709		na	na
YDR443C	SSN2		15			na	na
YDR444W				0.119323		na	na
YDR445C			46			na	na
YDR446W	ECM11	2.24154			0.0137497	na	na
YDR447C	RPS17B	107.914	28	0.441285	0.661951	1	0
YDR448W	ADA2	0.448309	14	0.206341	0.00274995	0.0133272	0.986673
YDR449C	UTP6	1.56908	5		0.00962481	na	na
YDR450W	RPS18A	80.3753	22	0.285557	0.493026	1	0
YDR451C	YHP1	0.704485	9	0.401949	0.00432134	0.010751	0.989249
YDR452W	PPN1	4.41904	12	0.0950157	0.0271066	0.285286	0.714714
YDR453C	TSA2	1.44099	37		0.00883911	na	na
YDR454C	GUK1	12.3605			0.0758199	na	na
YDR455C		0.0640441	23	0.146319	0.000392849	0.00268488	0.997315
YDR456W	NHX1	1.08875	12		0.00667844	na	na
YDR457W	TOM1	2.59379		0.0814036	0.0159104	0.195451	0.804549
YDR458C		1.15279	17	0.11869	0.00707129	0.0595776	0.940422
YDR459C	PFA5	0.800551	26	0.136992	0.00491062	0.035846	0.964154
YDR460W	TFB3	0.544375	14	0.164978	0.00333922	0.0202403	0.97976
YDR461C-A		1.69717			0.0104105	na	na
YDR461W	MFA1	27.2187			0.166961	na	na
YDR462W	MRPL28	2.24154	23	0.185082	0.0137497	0.0742901	0.92571
YDR463W	STP1	2.84996	7	0.127304	0.0174818	0.137323	0.862677
YDR464C-A						na	na
YDR464W	SPP41	0.544375			0.00333922	na	na
YDR465C	RMT2	7.30103	12		0.0447848	na	na
YDR466W	PKH3					na	na
YDR467C			29			na	na
YDR468C	TLG1	3.81062	19	0.187395	0.0233745	0.124734	0.875266
YDR469W	SDC1	1.12077		0.109712	0.00687486	0.0626629	0.937337
YDR470C	UGO1	0.256176		0.0532168	0.0015714	0.0295282	0.970472
YDR471W	RPL27B	59.4649	16	0.629129	0.364761	0.579787	0.420213
YDR472W	TRS31	0.960661	34		0.00589274	na	na
YDR473C	PRP3	1.40897		0.112835	0.00864269	0.0765957	0.923404
YDR475C		1.37695		0.248077	0.00844626	0.034047	0.965953
YDR476C		2.08143	14	0.242246	0.0127676	0.0527052	0.947295
YDR477W	SNF1	2.11346	18	0.136038	0.012964	0.095297	0.904703
YDR478W	SNM1		17	0.0970146		na	na
YDR479C	PEX29		44	0.120867		na	na
YDR480W	DIG2	1.12077	15	0.0810538	0.00687486	0.0848185	0.915181
YDR481C	PHO8	4.0668	20	0.351667	0.0249459	0.0709363	0.929064
YDR482C	CWC21	1.82526	13	0.262658	0.0111962	0.0426266	0.957373
YDR483W	KRE2	3.93871	31	0.120218	0.0241602	0.200971	0.799029
YDR484W	VPS52	0.544375		0.0691144	0.00333922	0.0483144	0.951686
YDR485C	VPS72	0.384265		0.15223	0.0023571	0.0154838	0.984516
YDR486C	VPS60	1.47301	18	0.121468	0.00903554	0.0743862	0.925614
YDR487C	RIB3	8.77404	17	0.299219	0.0538204	0.17987	0.82013
YDR488C	PAC11	0.544375	12	0.189838	0.00333922	0.0175898	0.98241
YDR489W	SLD5		12	0.0715604		na	na
YDR490C	PKH1			0.0649553		na	na
YDR491C		0.0640441	13	0.105699	0.000392849	0.0037167	0.996283
YDR492W	IZH1	0.960661		0.126079	0.00589274	0.0467385	0.953261
YDR493W		1.76121	17	0.186204	0.0108034	0.0580189	0.941981
YDR494W	RSM28		7	0.127242		na	na
YDR495C	VPS3					na	na
YDR496C	PUF6	0.992683	6	0.230004	0.00608917	0.0264742	0.973526
YDR497C	ITR1	6.85272		0.159768	0.0420349	0.263099	0.736901
YDR498C	SEC20	1.21684	10	0.137315	0.00746414	0.0543579	0.945642
YDR499W	LCD1	0.960661		0.057082	0.00589274	0.103233	0.896767
YDR500C	RPL37B	38.1062	22	0.693466	0.233745	0.337068	0.662932
YDR501W	PLM2	0.192132		0.0528519	0.00117855	0.0222991	0.977701
YDR502C	SAM2	10.7594	16	0.107167	0.0659987	0.61585	0.38415
YDR503C	LPP1	0.32022			0.00196425	na	na
YDR504C	SPG3	1.40897	51		0.00864269	na	na
YDR505C	PSP1			0.0650038		na	na
YDR506C		0.352243		0.0905404	0.00216067	0.0238642	0.976136
YDR507C	GIN4	0.832573		0.17361	0.00510704	0.0294167	0.970583
YDR508C	GNP1	2.97805		0.188058	0.0182675	0.0971378	0.902862
YDR509W		0.192132		0.372942	0.00117855	0.00316014	0.99684
YDR510C-A						na	na
YDR510W	SMT3		19			na	na
YDR511W	ACN9		33	0.171441		na	na
YDR512C	EMI1		20	0.0799504		na	na
YDR513W	GRX2		71			na	na
YDR514C			22	0.12221		na	na
YDR515W	SLF1	0.704485		0.0588919	0.00432134	0.0733775	0.926622
YDR516C	EMI2	5.50779		0.156316	0.033785	0.216133	0.783867
YDR517W	GRH1	4.16287	25	0.202264	0.0255352	0.126247	0.873753
YDR518W	EUG1	3.74658		0.0428909	0.0229817	0.535817	0.464183
YDR519W	FPR2	4.51511	23	0.120582	0.0276959	0.229685	0.770315
YDR520C		1.12077		0.0692485	0.00687486	0.0992781	0.900722
YDR521W				0.0722977		na	na
YDR522C	SPS2	0.032022	24	0.134881	0.000196425	0.00145628	0.998544
YDR523C	SPS1	0.0640441		0.0222799	0.000392849	0.0176324	0.982368
YDR524C	AGE1	0.672463		0.0701254	0.00412492	0.058822	0.941178
YDR524C-A						na	na
YDR524C-B		102.342			0.627773	na	na
YDR524W-C		149.927			0.91966	na	na
YDR525W	API2	0.0640441	66		0.000392849	na	na
YDR525W-A	SNA2	4.22691			0.0259281	na	na
YDR526C			14	0.187513		na	na
YDR527W	RBA50	1.63312		0.0958746	0.0100177	0.104487	0.895513
YDR528W	HLR1	0.896617	14	0.0553688	0.00549989	0.0993319	0.900668
YDR529C	QCR7	6.43643	28	0.11351	0.0394814	0.347823	0.652177
YDR530C	APA2	2.08143	36	0.0864509	0.0127676	0.147686	0.852314
YDR531W				0.164386		na	na
YDR532C			29	0.143389		na	na
YDR533C	HSP31	1.6011	62	0.0627047	0.00982124	0.156627	0.843373
YDR534C	FIT1	0.032022	26	0.0232163	0.000196425	0.00846063	0.991539
YDR535C		0.192132			0.00117855	na	na
YDR536W	STL1	0.288198	26	0.041369	0.00176782	0.0427331	0.957267
YDR537C						na	na
YDR538W	PAD1	0.768529			0.00471419	na	na
YDR539W		0.992683	16	0.0638828	0.00608917	0.0953177	0.904682
YDR540C		0.512353		0.0538362	0.0031428	0.058377	0.941623
YDR541C		1.63312		0.101662	0.0100177	0.0985388	0.901461
YDR542W			10			na	na
YDR543C						na	na
YDR544C			10			na	na
YDR545C-A						na	na
YDR545W	YRF1-1					na	na
YEL001C		2.72187	25	0.086304	0.0166961	0.193457	0.806543
YEL002C	WBP1	6.50048	29	0.118883	0.0398742	0.335407	0.664593
YEL003W	GIM4	3.55445	17	0.152715	0.0218031	0.142771	0.857229
YEL004W	YEA4	0.736507	51		0.00451777	na	na
YEL005C	VAB2	0.960661	41	0.050088	0.00589274	0.117648	0.882352
YEL006W	YEA6	1.12077	51		0.00687486	na	na
YEL007W		2.11346	20		0.012964	na	na
YEL008C-A						na	na
YEL008W				0.123396		na	na
YEL009C	GCN4	25.6497	19	1.36308	0.157336	0.115427	0.884573
YEL009C-A				0.0207391		na	na
YEL010W			70			na	na
YEL011W	GLC3	4.6432			0.0284816	na	na
YEL012W	UBC8	1.44099	34	0.0801468	0.00883911	0.110287	0.889713
YEL013W	VAC8	1.02471	36	0.180131	0.00628559	0.0348946	0.965105
YEL014C			38	0.25926		na	na
YEL015W	EDC3		14	0.144559		na	na
YEL016C	NPP2		21	0.0639852		na	na
YEL017C-A	PMP2		29			na	na
YEL017W	GTT3		17	0.0724496		na	na
YEL018C-A						na	na
YEL018W	EAF5	1.44099	22	0.211875	0.00883911	0.0417186	0.958281
YEL019C	MMS21	0.128088	40	0.0385062	0.000785699	0.0204045	0.979596
YEL020C		0.352243	32	0.123496	0.00216067	0.0174958	0.982504
YEL020C-B						na	na
YEL020W-A	TIM9					na	na
YEL021W	URA3	0.0640441	32		0.000392849	na	na
YEL022W	GEA2	1.98537			0.0121783	na	na
YEL023C		0.128088		0.0438929	0.000785699	0.0179004	0.9821
YEL024W	RIP1	3.36232	15	0.0454719	0.0206246	0.453568	0.546432
YEL025C		2.11346	19	0.0911873	0.012964	0.142169	0.857831
YEL026W	SNU13	25.9058	16		0.158908	na	na
YEL027W	CUP5	31.0294	25	0.0876777	0.190336	1	0
YEL028W		0.608419	36	0.106569	0.00373207	0.0350201	0.96498
YEL029C	BUD16	3.23423	27	0.0641636	0.0198389	0.309193	0.690807
YEL030C-A				0.0782959		na	na
YEL030W	ECM10	0.704485	249	0.0454151	0.00432134	0.0951521	0.904848
YEL031W	SPF1	1.95334			0.0119819	na	na
YEL032C-A						na	na
YEL032W	MCM3	0.768529	7	0.17301	0.00471419	0.0272481	0.972752
YEL033W			33	0.20172		na	na
YEL034C-A				0.316552		na	na
YEL034W	HYP2		18	0.392702		na	na
YEL035C	UTR5	0.0640441	50	0.495165	0.000392849	0.000793371	0.999207
YEL036C	ANP1	2.24154	13		0.0137497	na	na
YEL037C	RAD23	5.73195	10		0.03516	na	na
YEL038W	UTR4	6.5325	26	0.0837927	0.0400706	0.478212	0.521788
YEL039C	CYC7	6.34037		0.0315886	0.0388921	1	0
YEL040W	UTR2	38.0422	9	0.603601	0.233353	0.3866	0.6134
YEL041W	YEF1	0.032022	43		0.000196425	na	na
YEL042W	GDA1	3.87467	11	0.115993	0.0237674	0.204904	0.795096
YEL043W		2.01739	20		0.0123748	na	na
YEL044W	IES6	2.30559	14	0.229006	0.0141426	0.0617563	0.938244
YEL045C			17	0.0528639		na	na
YEL046C	GLY1	13.6414	9	1.2018	0.0836769	0.0696261	0.930374
YEL047C		1.79323		0.181402	0.0109998	0.0606374	0.939363
YEL048C		0.512353	21		0.0031428	na	na
YEL049W	PAU2			0.0195518		na	na
YEL050C	RML2		19			na	na
YEL050W-A						na	na
YEL051W	VMA8	18.1245	19	0.229424	0.111176	0.48459	0.51541
YEL052W	AFG1	1.95334	20		0.0119819	na	na
YEL053C	MAK10	1.15279	15	0.0617611	0.00707129	0.114494	0.885506
YEL053W-A						na	na
YEL054C	RPL12A	19.9818	22		0.122569	na	na
YEL055C	POL5		35	0.0687679		na	na
YEL056W	HAT2		24			na	na
YEL057C			96	0.0383523		na	na
YEL058W	PCM1		33	0.286717		na	na
YEL059C-A	SOM1	1.40897	25		0.00864269	na	na
YEL059W		0.0640441	27	0.0265686	0.000392849	0.0147862	0.985214
YEL060C	PRB1	7.87742			0.0483205	na	na
YEL061C	CIN8	0.512353	20	0.094783	0.0031428	0.0331578	0.966842
YEL062W	NPR2	0.448309		0.106532	0.00274995	0.0258134	0.974187
YEL063C	CAN1	0.896617		0.204155	0.00549989	0.0269398	0.97306
YEL064C	AVT2	0.192132		0.0470511	0.00117855	0.0250482	0.974952
YEL065W	SIT1	1.6011	13		0.00982124	na	na
YEL066W	HPA3	0.608419		0.0620061	0.00373207	0.0601887	0.939811
YEL067C		0.0640441	30	0.0263516	0.000392849	0.014908	0.985092
YEL068C		1.12077	37		0.00687486	na	na
YEL069C	HXT13					na	na
YEL070W	DSF1		41	0.00670958		na	na
YEL071W	DLD3	12.2004	38	0.456888	0.0748378	0.163799	0.836201
YEL072W	RMD6	1.05673	76	0.0389954	0.00648202	0.166225	0.833775
YEL073C		0.0640441			0.000392849	na	na
YEL074W		0.0640441	14		0.000392849	na	na
YEL075C						na	na
YEL075W-A						na	na
YEL076C			5			na	na
YEL076C-A						na	na
YEL077C			6	0.127713		na	na
YEL077W-A						na	na
YER001W	MNN1	3.84265	48		0.023571	na	na
YER002W	NOP16	6.62856		0.326482	0.0406599	0.12454	0.87546
YER003C	PMI40	2.72187	33	0.0982994	0.0166961	0.169849	0.830151
YER004W		4.38702	38	0.241509	0.0269102	0.111425	0.888575
YER005W	YND1	1.02471	68	0.139067	0.00628559	0.0451983	0.954802
YER006C-A						na	na
YER006W	NUG1		10	0.244771		na	na
YER007C-A	TMA20	5.05948	19	0.104621	0.0310351	0.296644	0.703356
YER007W	PAC2	3.65051		0.0544617	0.0223924	0.411159	0.588841
YER008C	SEC3	1.47301	46	0.103785	0.00903554	0.0870605	0.91294
YER009W	NTF2	19.8857		0.147072	0.12198	0.829387	0.170613
YER010C		9.41448		0.0649452	0.0577489	0.889194	0.110806
YER011W	TIR1	2.27357	49		0.0139462	na	na
YER012W	PRE1	2.91401	14	0.180692	0.0178746	0.098923	0.901077
YER013W	PRP22	0.352243		0.0647733	0.00216067	0.0333574	0.966643
YER014C-A	BUD25					na	na
YER014W	HEM14					na	na
YER015W	FAA2	0.640441		0.0272756	0.00392849	0.144029	0.855971
YER016W	BIM1	1.21684	10		0.00746414	na	na
YER017C	AFG3	0.960661	10	0.133114	0.00589274	0.0442685	0.955731
YER018C	SPC25	0.512353	16	0.425988	0.0031428	0.00737766	0.992622
YER019C-A	SBH2		14			na	na
YER019W	ISC1			0.148636		na	na
YER020W	GPA2	2.14548	21		0.0131605	na	na
YER021W	RPN3	5.60386	18	0.256822	0.0343743	0.133845	0.866155
YER022W	SRB4	1.85728	23	0.0915738	0.0113926	0.124409	0.875591
YER023C-A						na	na
YER023W	PRO3	7.23698	40		0.044392	na	na
YER024W	YAT2	0.256176	19	0.0970213	0.0015714	0.0161964	0.983804
YER025W	GCD11	4.57915	8	0.248907	0.0280887	0.112848	0.887152
YER026C	CHO1	2.81794	13	0.114646	0.0172854	0.150771	0.849229
YER027C	GAL83	5.28364	18	0.114623	0.0324101	0.282753	0.717247
YER028C	MIG3	1.53706		0.0575215	0.00942839	0.163911	0.836089
YER029C	SMB1	1.3129		0.163366	0.00805341	0.0492968	0.950703
YER030W		8.26169	21	0.214452	0.0506776	0.236312	0.763688
YER031C	YPT31	10.6954		0.128673	0.0656059	0.509866	0.490134
YER032W	FIR1	0.608419	16	0.0573735	0.00373207	0.0650487	0.934951
YER033C	ZRG8	0.256176			0.0015714	na	na
YER034W		0.768529	26	0.137037	0.00471419	0.0344009	0.965599
YER035W	EDC2	1.76121	18	1.34868	0.0108034	0.00801031	0.99199
YER036C	ARB1	12.5206	14	0.620735	0.0768021	0.123728	0.876272
YER037W	PHM8		49	0.111249		na	na
YER038C	KRE29		35	0.0376874		na	na
YER038W-A						na	na
YER039C	HVG1		16	0.102237		na	na
YER039C-A				0.0627037		na	na
YER040W	GLN3	0.32022	16	0.0689963	0.00196425	0.0284689	0.971531
YER041W	YEN1	0.544375			0.00333922	na	na
YER042W	MXR1	5.34768	33	0.0513232	0.0328029	0.639144	0.360856
YER043C	SAH1	5.6679	35	0.359717	0.0347672	0.0966514	0.903349
YER044C	ERG28	5.69992		0.11356	0.0349636	0.307887	0.692113
YER044C-A	MEI4	0.032022			0.000196425	na	na
YER045C	ACA1	0.960661	25		0.00589274	na	na
YER046W	SPO73		31	0.0933865		na	na
YER046W-A						na	na
YER047C	SAP1		12	0.109885		na	na
YER048C	CAJ1	12.2004	15	0.187227	0.0748378	0.399717	0.600283
YER048W-A	ISD11	2.68985			0.0164997	na	na
YER049W		3.04209	14	0.292862	0.0186603	0.0637172	0.936283
YER050C	RSM18	5.60386	16	0.142968	0.0343743	0.240434	0.759566
YER051W		0.864595	16	0.0504333	0.00530347	0.105158	0.894842
YER052C	HOM3	7.07687		0.199538	0.0434099	0.217552	0.782448
YER053C	PIC2	8.00551		0.0893309	0.0491062	0.549711	0.450289
YER053C-A		1.56908			0.00962481	na	na
YER054C	GIP2	0.896617			0.00549989	na	na
YER055C	HIS1	15.6588	9	0.236491	0.0960517	0.406154	0.593846
YER056C	FCY2	11.2718	20		0.0691415	na	na
YER056C-A	RPL34A	33.431	25	0.557827	0.205067	0.367618	0.632382
YER057C	HMF1	7.10889	55	0.113808	0.0436063	0.383155	0.616845
YER058W	PET117	1.18482		0.131231	0.00726771	0.0553811	0.944619
YER059W	PCL6	2.24154	18	0.0841429	0.0137497	0.163409	0.836591
YER060W	FCY21	1.15279		0.108591	0.00707129	0.0651185	0.934882
YER060W-A	FCY22	0.832573	28	0.0560244	0.00510704	0.0911575	0.908843
YER061C	CEM1	1.79323	21	0.0634706	0.0109998	0.173305	0.826695
YER062C	HOR2	22.1272	18		0.135729	na	na
YER063W	THO1	1.79323	17	0.126347	0.0109998	0.0870599	0.91294
YER064C		1.76121	21	0.162184	0.0108034	0.0666118	0.933388
YER065C	ICL1	0.448309		0.0961448	0.00274995	0.0286021	0.971398
YER066C-A		0.0640441			0.000392849	na	na
YER066W		0.480331	37	0.078049	0.00294637	0.0377503	0.96225
YER067C-A						na	na
YER067W				0.0798993		na	na
YER068C-A		0.0640441			0.000392849	na	na
YER068W	MOT2	2.01739	20	0.195054	0.0123748	0.0634427	0.936557
YER069W	ARG5,6	0.544375	14	0.0766019	0.00333922	0.0435918	0.956408
YER070W	RNR1	2.97805	7	0.532053	0.0182675	0.034334	0.965666
YER071C		3.17018	36		0.019446	na	na
YER072W	VTC1	74.3232		0.204091	0.455902	1	0
YER073W	ALD5	6.02014		0.224507	0.0369278	0.164484	0.835516
YER074W	RPS24A	52.324	16		0.320958	na	na
YER074W-A	YOS1	12.2324		0.0632482	0.0750342	1	0
YER075C	PTP3	0.192132	21		0.00117855	na	na
YER076C		0.0640441	42	0.0550297	0.000392849	0.00713887	0.992861
YER076W-A		0.32022		0.0492923	0.00196425	0.039849	0.960151
YER077C		0.992683	24	0.0962824	0.00608917	0.0632428	0.936757
YER078C		1.05673	27		0.00648202	na	na
YER078W-A		0.0640441			0.000392849	na	na
YER079C-A				0.0559746		na	na
YER079W		6.69261		0.0752338	0.0410528	0.545669	0.454331
YER080W		2.01739	38	0.115754	0.0123748	0.106905	0.893095
YER081W	SER3	2.1775		0.256992	0.0133569	0.051974	0.948026
YER082C	UTP7	1.6011	16	0.294509	0.00982124	0.0333479	0.966652
YER083C	GET2	7.23698	16		0.044392	na	na
YER084W		0.0640441	7		0.000392849	na	na
YER084W-A						na	na
YER085C			13			na	na
YER086W	ILV1	3.87467	17	0.123028	0.0237674	0.193187	0.806813
YER087C-A			20			na	na
YER087C-B	SBH1	12.2004			0.0748378	na	na
YER087W				0.108262		na	na
YER088C	DOT6	4.77129	21	0.178323	0.0292673	0.164125	0.835875
YER088C-A		0.192132			0.00117855	na	na
YER088W-B						na	na
YER089C	PTC2		18	0.229447		na	na
YER090C-A						na	na
YER090W	TRP2	2.84996	20	0.0588135	0.0174818	0.297241	0.702759
YER091C	MET6	18.1885	21		0.111569	na	na
YER091C-A		0.0640441			0.000392849	na	na
YER092W	IES5		12	0.217388		na	na
YER093C	TSC11			0.105382		na	na
YER093C-A		0.512353	18		0.0031428	na	na
YER094C	PUP3	18.3486		0.315733	0.112551	0.356477	0.643523
YER095W	RAD51	0.768529		0.0702189	0.00471419	0.0671357	0.932864
YER096W	SHC1	0.0640441	69		0.000392849	na	na
YER097W						na	na
YER098W	UBP9	0.832573	45	0.0267465	0.00510704	0.190942	0.809058
YER099C	PRS2	7.46114	18	0.13423	0.045767	0.340958	0.659042
YER100W	UBC6	3.2022	24	0.152563	0.0196425	0.12875	0.87125
YER101C	AST2	0.704485		0.0465439	0.00432134	0.0928445	0.907155
YER102W	RPS8B	102.855	21	0.277914	0.630916	1	0
YER103W	SSA4	20.0778		0.0792326	0.123158	1	0
YER104W	RTT105	0.32022	85	0.0608069	0.00196425	0.032303	0.967697
YER105C	NUP157	1.66515	25	0.0996196	0.0102141	0.102531	0.897469
YER106W	MAM1	0.288198			0.00176782	na	na
YER107C	GLE2	1.85728			0.0113926	na	na
YER107W-A		2.4657			0.0151247	na	na
YER109C	FLO8	0.256176	16	0.0714163	0.0015714	0.0220033	0.977997
YER110C	KAP123	2.24154	22	0.0460739	0.0137497	0.298427	0.701573
YER111C	SWI4	0.384265			0.0023571	na	na
YER112W	LSM4	1.95334	5	0.162674	0.0119819	0.0736559	0.926344
YER113C		0.32022		0.0995787	0.00196425	0.0197256	0.980274
YER114C	BOI2	0.512353	19	0.0588206	0.0031428	0.0534302	0.94657
YER115C	SPR6	1.24886	38	0.109963	0.00766056	0.069665	0.930335
YER116C	SLX8	0.384265	17	0.0753154	0.0023571	0.0312964	0.968704
YER117W	RPL23B	30.9013	25	0.63491	0.18955	0.298546	0.701454
YER118C	SHO1	2.36963	10		0.0145354	na	na
YER119C	AVT6	0.896617		0.0404922	0.00549989	0.135826	0.864174
YER119C-A			18			na	na
YER120W	SCS2	13.6734	16	0.189992	0.0838734	0.441456	0.558544
YER121W		0.544375	49		0.00333922	na	na
YER122C	GLO3	1.6011	17		0.00982124	na	na
YER123W	YCK3	0.736507		0.124051	0.00451777	0.0364188	0.963581
YER124C	DSE1	4.57915	13	1.12688	0.0280887	0.0249261	0.975074
YER125W	RSP5	1.50504	19	0.214914	0.00923196	0.0429566	0.957043
YER126C	NSA2	1.21684	12	0.226245	0.00746414	0.0329914	0.967009
YER127W	LCP5	1.72919	11		0.0106069	na	na
YER128W		0.544375		0.0783281	0.00333922	0.0426312	0.957369
YER129W	SAK1	0.384265		0.130806	0.0023571	0.0180198	0.98198
YER130C		3.23423	17	0.425926	0.0198389	0.0465782	0.953422
YER131W	RPS26B	61.3863	22	0.398958	0.376546	0.943825	0.0561748
YER132C	PMD1	0.608419			0.00373207	na	na
YER133W	GLC7	7.87742	19	0.315606	0.0483205	0.153104	0.846896
YER133W-A						na	na
YER134C				0.0813978		na	na
YER135C		0.0640441	44		0.000392849	na	na
YER136W	GDI1	6.05217	27		0.0371243	na	na
YER137C		0.640441	45	0.106855	0.00392849	0.0367649	0.963235
YER137W-A						na	na
YER138W-A						na	na
YER139C		0.704485	24	0.0895374	0.00432134	0.048263	0.951737
YER140W		0.512353		0.101164	0.0031428	0.0310662	0.968934
YER141W	COX15	1.82526	33	0.0900201	0.0111962	0.124375	0.875625
YER142C	MAG1	0.608419	32	0.0591661	0.00373207	0.0630778	0.936922
YER143W	DDI1	2.11346	25	0.134262	0.012964	0.0965578	0.903442
YER144C	UBP5	1.02471	29		0.00628559	na	na
YER145C	FTR1	2.62581	14	0.167363	0.0161068	0.0962391	0.903761
YER145C-A		0.0640441			0.000392849	na	na
YER146W	LSM5		16	0.286721		na	na
YER147C	SCC4	0.608419	22	0.167839	0.00373207	0.022236	0.977764
YER147C-A				0.201926		na	na
YER148W	SPT15	9.38246	10	0.178595	0.0575524	0.322251	0.677749
YER148W-A						na	na
YER149C	PEA2		12	0.0978329		na	na
YER150W	SPI1	21.2947		0.0519382	0.130622	1	0
YER151C	UBP3	3.84265			0.023571	na	na
YER152C		12.0723	28	0.197708	0.0740521	0.374552	0.625448
YER152W-A						na	na
YER153C	PET122		18			na	na
YER154W	OXA1	4.77129	13	0.176185	0.0292673	0.166117	0.833883
YER155C	BEM2	3.39434		0.198585	0.020821	0.104847	0.895153
YER156C		3.23423	7	0.45352	0.0198389	0.0437443	0.956256
YER157W	COG3	0.800551	20	0.0856896	0.00491062	0.057307	0.942693
YER158C		0.416287		0.0901505	0.00255352	0.0283251	0.971675
YER158W-A						na	na
YER159C	BUR6		6	0.711307		na	na
YER161C	SPT2	0.768529	27	0.173992	0.00471419	0.0270943	0.972906
YER162C	RAD4	0.512353	22	0.0862551	0.0031428	0.0364361	0.963564
YER163C		5.21959	41	0.0999159	0.0320172	0.320442	0.679558
YER164W	CHD1	1.6011	41	0.0859711	0.00982124	0.114239	0.885761
YER165C-A		0.0640441			0.000392849	na	na
YER165W	PAB1	17.7402	15	0.627992	0.108819	0.173281	0.826719
YER166W	DNF1	1.56908			0.00962481	na	na
YER167W	BCK2	6.11621	24	0.215144	0.0375171	0.174381	0.825619
YER168C	CCA1	2.59379	19	0.0740069	0.0159104	0.214985	0.785015
YER169W	RPH1	0.736507	24	0.137205	0.00451777	0.0329271	0.967073
YER170W	ADK2	1.21684	19	0.0713	0.00746414	0.104686	0.895314
YER171W	RAD3	2.91401	9		0.0178746	na	na
YER172C	BRR2	1.21684			0.00746414	na	na
YER172C-A						na	na
YER173W	RAD24	0.448309	25	0.0734607	0.00274995	0.0374343	0.962566
YER174C	GRX4	1.18482	14	0.110344	0.00726771	0.0658639	0.934136
YER175C	TMT1	0.768529	55	0.0427071	0.00471419	0.110384	0.889616
YER175W-A		0.608419			0.00373207	na	na
YER176W	ECM32	1.34493	17	0.183165	0.00824984	0.0450405	0.954959
YER177W	BMH1	25.7137	18	0.835531	0.157729	0.188777	0.811223
YER178W	PDA1	15.1785	43	0.145004	0.0931053	0.642089	0.357911
YER179W	DMC1	0.192132	57	0.0264599	0.00117855	0.044541	0.955459
YER180C	ISC10	0.832573	33	0.170094	0.00510704	0.0300248	0.969975
YER180C-A	SLO1	0.192132			0.00117855	na	na
YER181C		0.0640441	106		0.000392849	na	na
YER182W			27	0.0713681		na	na
YER183C	FAU1		44	0.0938262		na	na
YER184C		0.256176	18		0.0015714	na	na
YER185W		0.192132		0.0115198	0.00117855	0.102307	0.897693
YER186C		2.01739			0.0123748	na	na
YER187W		0.256176		0.111372	0.0015714	0.0141095	0.985891
YER188C-A						na	na
YER188W		0.192132			0.00117855	na	na
YER189W						na	na
YER190C-A						na	na
YER190C-B						na	na
YER190W	YRF1-2					na	na
YFL001W	DEG1	1.56908		0.115079	0.00962481	0.0836366	0.916363
YFL002C	SPB4	1.50504			0.00923196	na	na
YFL003C	MSH4	0.128088		0.116773	0.000785699	0.00672845	0.993272
YFL004W	VTC2	9.25437	19	0.269483	0.0567667	0.21065	0.78935
YFL005W	SEC4	6.43643		0.207858	0.0394814	0.189944	0.810056
YFL007W	BLM10	1.95334		0.0700638	0.0119819	0.171014	0.828986
YFL008W	SMC1	1.37695	27	0.0858804	0.00844626	0.0983491	0.901651
YFL009W	CDC4	1.53706	34	0.104517	0.00942839	0.0902089	0.909791
YFL010C	WWM1					na	na
YFL010W-A	AUA1					na	na
YFL011W	HXT10	0.0640441			0.000392849	na	na
YFL012W		0.032022			0.000196425	na	na
YFL012W-A		0.0640441			0.000392849	na	na
YFL013C	IES1			0.134606		na	na
YFL013W-A			42			na	na
YFL014W	HSP12	2.24154			0.0137497	na	na
YFL015C			24			na	na
YFL015W-A						na	na
YFL016C	MDJ1	5.18757	59	0.633414	0.0318208	0.0502369	0.949763
YFL017C	GNA1		20	0.193457		na	na
YFL017W-A	SMX2		71			na	na
YFL018C	LPD1	8.71	32	0.074782	0.0534275	0.714443	0.285557
YFL019C		0.128088	28		0.000785699	na	na
YFL020C	PAU5	0.0640441	10	0.0119198	0.000392849	0.0329578	0.967042
YFL021C-A		0.0640441			0.000392849	na	na
YFL021W	GAT1	0.960661		0.0397324	0.00589274	0.148311	0.851689
YFL022C	FRS2	8.9982	19	0.178879	0.0551953	0.308562	0.691438
YFL023W	BUD27	0.800551		0.183355	0.00491062	0.026782	0.973218
YFL024C	EPL1	1.15279			0.00707129	na	na
YFL025C	BST1	0.640441		0.163556	0.00392849	0.0240192	0.975981
YFL026W	STE2	2.78592	45	0.569889	0.0170889	0.0299864	0.970014
YFL027C	GYP8	1.3129			0.00805341	na	na
YFL028C	CAF16	3.87467	14	0.11268	0.0237674	0.210928	0.789072
YFL029C	CAK1			0.0716294		na	na
YFL030W	AGX1					na	na
YFL031C-A						na	na
YFL031W	HAC1		17	1.04765		na	na
YFL032W			16	0.216122		na	na
YFL033C	RIM15	0.448309			0.00274995	na	na
YFL034C-A	RPL22B	15.4026	12		0.0944803	na	na
YFL034C-B	MOB2	0.992683		0.119445	0.00608917	0.050979	0.949021
YFL034W		0.448309		0.0425517	0.00274995	0.064626	0.935374
YFL036W	RPO41	0.672463		0.146456	0.00412492	0.0281648	0.971835
YFL037W	TUB2	12.8408	39	0.104423	0.0787663	0.754298	0.245702
YFL038C	YPT1	6.18026	29	0.326987	0.03791	0.115937	0.884063
YFL039C	ACT1	56.8071	46	0.215728	0.348457	1	0
YFL040W		0.0640441	37		0.000392849	na	na
YFL041W	FET5	1.56908		0.129044	0.00962481	0.0745854	0.925415
YFL041W-A		0.416287			0.00255352	na	na
YFL042C		1.72919			0.0106069	na	na
YFL044C	OTU1	1.3129		0.300933	0.00805341	0.0267615	0.973239
YFL045C	SEC53	19.4694	23	0.397584	0.119426	0.30038	0.69962
YFL046W		4.6432		0.0833745	0.0284816	0.34161	0.65839
YFL047W	RGD2	0.32022		0.096392	0.00196425	0.0203777	0.979622
YFL048C	EMP47	4.96342		0.170007	0.0304458	0.179086	0.820914
YFL049W	SWP82	0.480331		0.159507	0.00294637	0.0184718	0.981528
YFL050C	ALR2	0.448309		0.110871	0.00274995	0.0248031	0.975197
YFL051C		0.0640441	44	0.0371428	0.000392849	0.0105767	0.989423
YFL052W		0.128088		0.0143865	0.000785699	0.0546137	0.945386
YFL053W	DAK2	0.224154		0.0129265	0.00137497	0.106368	0.893632
YFL054C		0.192132			0.00117855	na	na
YFL055W	AGP3	0.128088	26	0.0266079	0.000785699	0.0295288	0.970471
YFL056C	AAD6			0.105332		na	na
YFL057C	AAD16			0.0818905		na	na
YFL058W	THI5			0.0110827		na	na
YFL059W	SNZ3		27	0.0360141		na	na
YFL060C	SNO3			0.0426182		na	na
YFL061W				0.0223889		na	na
YFL062W	COS4					na	na
YFL063W						na	na
YFL064C			3			na	na
YFL065C						na	na
YFL066C			3			na	na
YFL067W				0.03969		na	na
YFL068W						na	na
YFR001W	LOC1	2.33761		0.134922	0.014339	0.106276	0.893724
YFR002W	NIC96	3.45838		0.18783	0.0212139	0.112942	0.887058
YFR003C	YPI1	5.09151	29	0.175486	0.0312315	0.177971	0.822029
YFR004W	RPN11	10.3431	8	0.325689	0.0634452	0.194803	0.805197
YFR005C	SAD1	1.3129	20	0.074109	0.00805341	0.10867	0.89133
YFR006W		1.08875		0.110337	0.00667844	0.0605274	0.939473
YFR007W		0.800551		0.0875018	0.00491062	0.0561202	0.94388
[truncated: 4,577 more rows]
